# Supplementary material for: Ring Expansion of Alkylidenecarbenes Derived from Lactams, Lactones, and Thiolactones into Strained Heterocyclic Alkynes: A Theoretical Study
Source: MDPI journal article supplement (doi:10.3390/molecules24030593), 2019-02-07
Supplement: s1 [file s1]

## ELECTRONIC SUPPORTING INFORMATION

# The Ring Expansion of Alkylidenecarbenes derived from Lactams, Lactones, and Thiolactones into Strained Heterocyclic Alkynes: A Theoretical Study

Nguyen Nhat Thu Le,<sup>1</sup> Josefine Just,<sup>1</sup> Jonathan M. Pankauski,<sup>1</sup> Paul R. Rablen,<sup>2,\*</sup> and Dasan M. Thamattoor<sup>1,\*</sup>

<sup>1</sup> Department of Chemistry, Colby College, Waterville, ME 04901, USA; [nnle@colby.edu](mailto:nnle@colby.edu) (N.N.T.L.); [jjust@colby.edu](mailto:jjust@colby.edu) (J.J.); [jmpank21@colby.edu](mailto:jmpank21@colby.edu) (J.M.P.); [dmthamat@colby.edu](mailto:dmthamat@colby.edu) (D.M.T.)

<sup>2</sup> Department of Chemistry and Biochemistry, Swarthmore College, 500 College Avenue, Swarthmore, PA 19081, USA; [prablen1@swarthmore.edu](mailto:prablen1@swarthmore.edu) (P.R.R.)

\* Correspondence: [prablen1@swarthmore.edu](mailto:prablen1@swarthmore.edu) (P.R.R.); [dmthamat@colby.edu](mailto:dmthamat@colby.edu) (D.M.T.)

## Table of Contents

|      |                                                                                                                                                                                                                                       |     |
|------|---------------------------------------------------------------------------------------------------------------------------------------------------------------------------------------------------------------------------------------|-----|
| (1)  | <b>Figure 1S.</b> CCSD(T)/cc-pVTZ//B3LYP/6-311+G** structures and energies of singlet and triplet <b>12</b> , and the PES for the conversion of singlet <b>12</b> into 1-azacyclopent-2-yne ( <b>13</b> ) by two different pathways.  | S2  |
| (2)  | <b>Figure 2S.</b> CCSD(T)/cc-pVTZ//B3LYP/6-311+G** structures and energies of singlet and triplet <b>14</b> .                                                                                                                         | S3  |
| (3)  | <b>Figure 3S.</b> CCSD(T)/cc-pVTZ//B3LYP/6-311+G** structures and energies of singlet and triplet <b>16</b> , and the PES for the conversion of singlet <b>16</b> into 1-thiocyclopent-2-yne ( <b>17</b> ) by two different pathways. | S3  |
| (4)  | <b>Figure 4S.</b> CCSD(T)/cc-pVTZ//B3LYP/6-311+G** structures and energies of singlet and triplet <b>18</b> , and the PES for the conversion of singlet <b>18</b> into 1-azacyclohex-2-yne ( <b>19</b> ) by two different pathways.   | S4  |
| (5)  | <b>Figure 5S.</b> CCSD(T)/cc-pVTZ//B3LYP/6-311+G** structures and energies of singlet and triplet <b>20</b> , and the PES for the conversion of singlet <b>20</b> into 1-oxacyclohex-2-yne ( <b>21</b> ) by two different pathways.   | S5  |
| (6)  | <b>Figure 6S.</b> CCSD(T)/cc-pVTZ//B3LYP/6-311+G** structures and energies of singlet and triplet <b>22</b> , and the PES for the conversion of singlet <b>21</b> into 1-thiocyclohex-2-yne ( <b>23</b> ) by two different pathways.  | S6  |
| (7)  | <b>Figure 7S.</b> CCSD(T)/cc-pVTZ//B3LYP/6-311+G** structures and energies of singlet and triplet <b>24</b> , and the PES for the conversion of singlet <b>24</b> into 1-azacyclohept-2-yne ( <b>25</b> ) by two different pathways.  | S7  |
| (8)  | <b>Figure 8S.</b> CCSD(T)/cc-pVTZ//B3LYP/6-311+G** structures and energies of singlet and triplet <b>26</b> , and the PES for the conversion of singlet <b>26</b> into 1-oxacyclohept-2-yne ( <b>27</b> ) by two different pathways.  | S8  |
| (9)  | <b>Figure 9S.</b> CCSD(T)/cc-pVTZ//B3LYP/6-311+G** structures and energies of singlet and triplet <b>28</b> , and the PES for the conversion of singlet <b>28</b> into 1-thiocyclohept-2-yne ( <b>29</b> ) by two different pathways. | S9  |
| (10) | Coordinates and energies for (R/U)B3LYP/6-311+G** optimized structures                                                                                                                                                                | S10 |
| (11) | Summary output of (R/U)CCSD(T)/cc-pVTZ//B3LYP/6-311+G** calculations                                                                                                                                                                  | S32 |
| (12) | Coordinates and energies for (R/U)CCSD/6-311+G** optimized structures                                                                                                                                                                 | S46 |
| (13) | Summary output of (R/U)CCSD(T)/cc-pVTZ//CCSD/6-311+G** calculations                                                                                                                                                                   | S69 |
| (14) | Summary of Natural Population Analysis at CCSD/6-311+G**                                                                                                                                                                              | S84 |

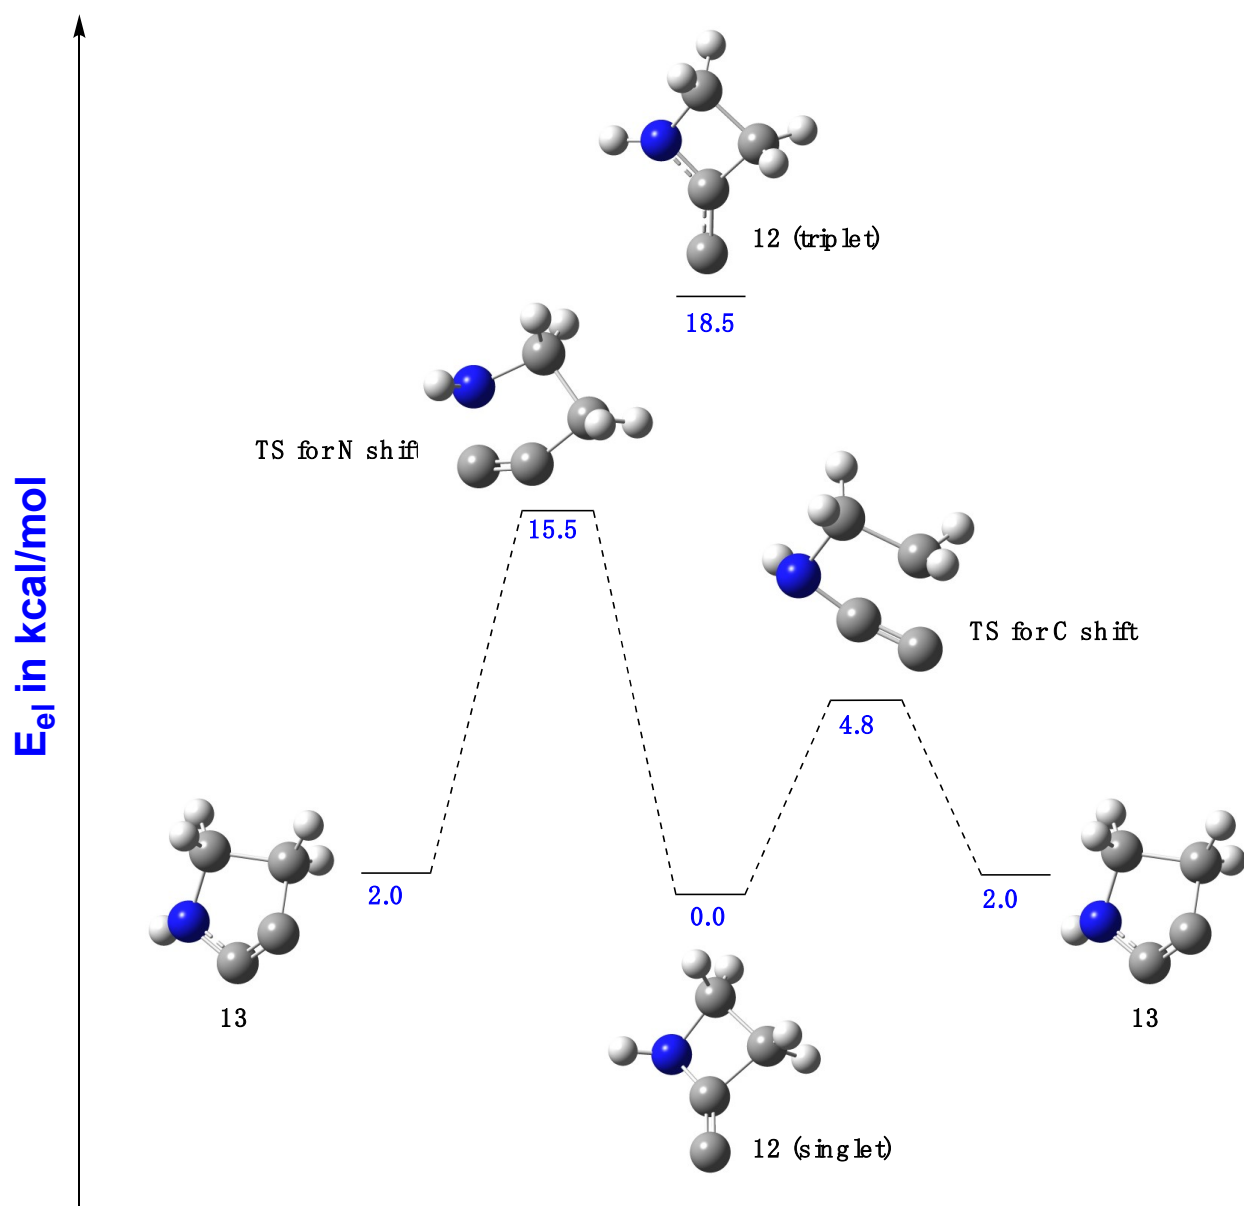

**Figure 1S.** CCSD(T)/cc-pVTZ//B3LYP/6-311+G\*\* structures and energies of singlet and triplet **12**, and the PES for the conversion of singlet **12** into 1-azacyclopent-2-yne (**13**) by two different pathways.

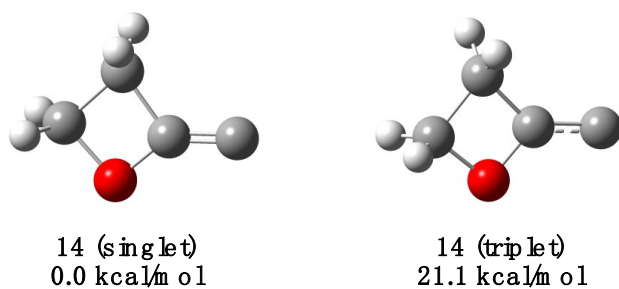

Figure 2S. CCSD(T)/cc-pVTZ//B3LYP/6-311+G\*\* structures and energies of singlet and triplet 14.

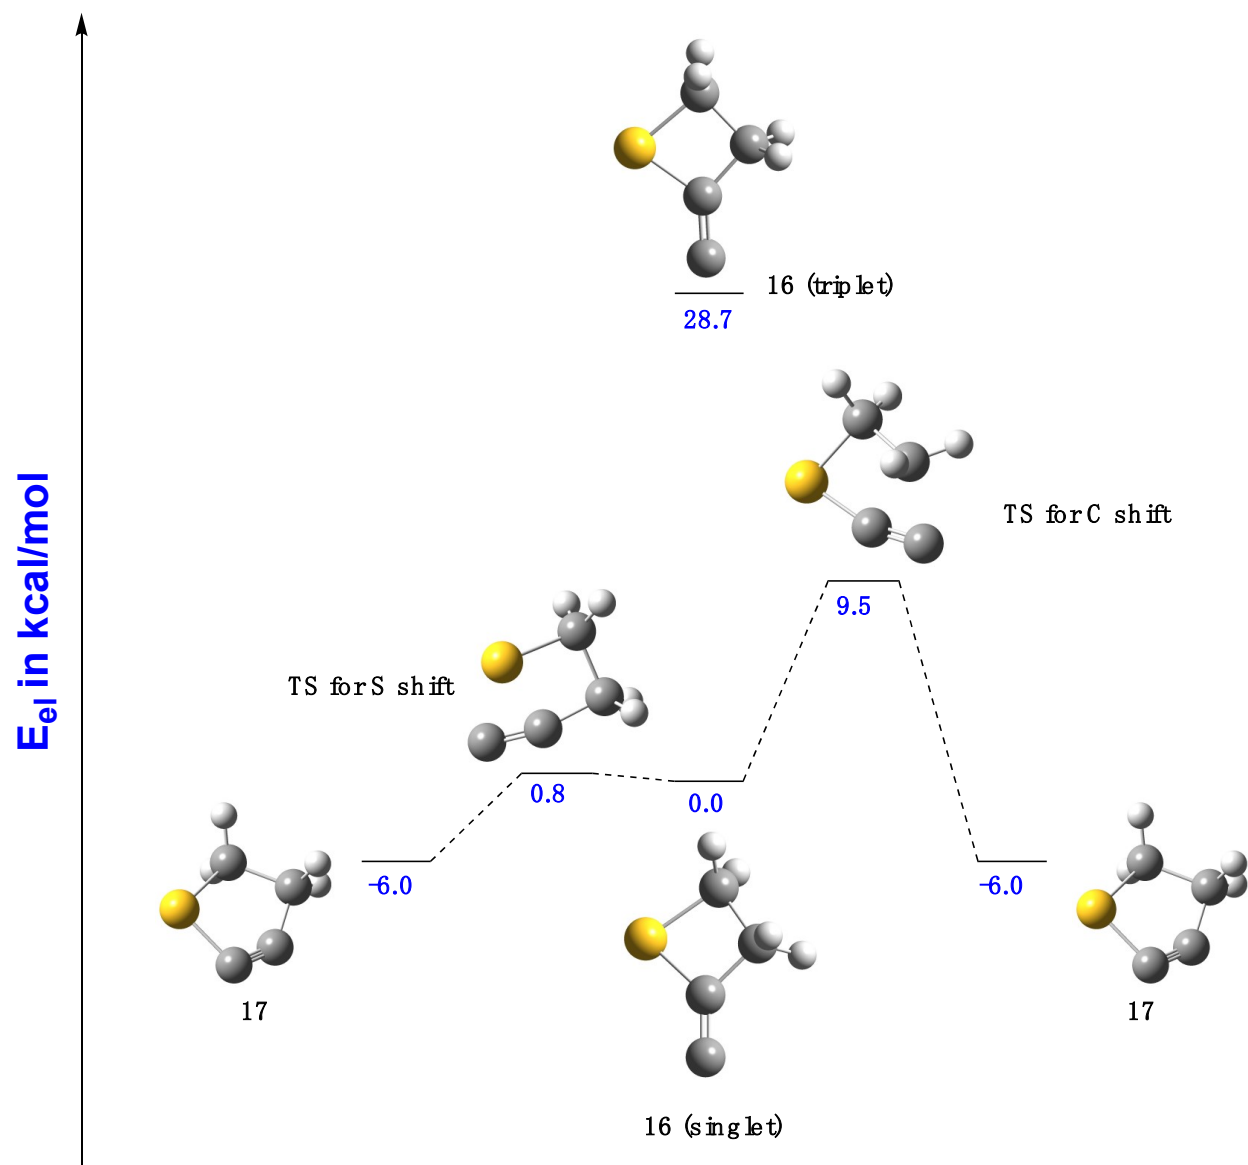

Figure 3S. CCSD(T)/cc-pVTZ//B3LYP/6-311+G\*\* structures and energies of singlet and triplet 16, and the PES for the conversion of singlet 16 into 1-thiocyclopent-2-yne (17) by two different pathways.

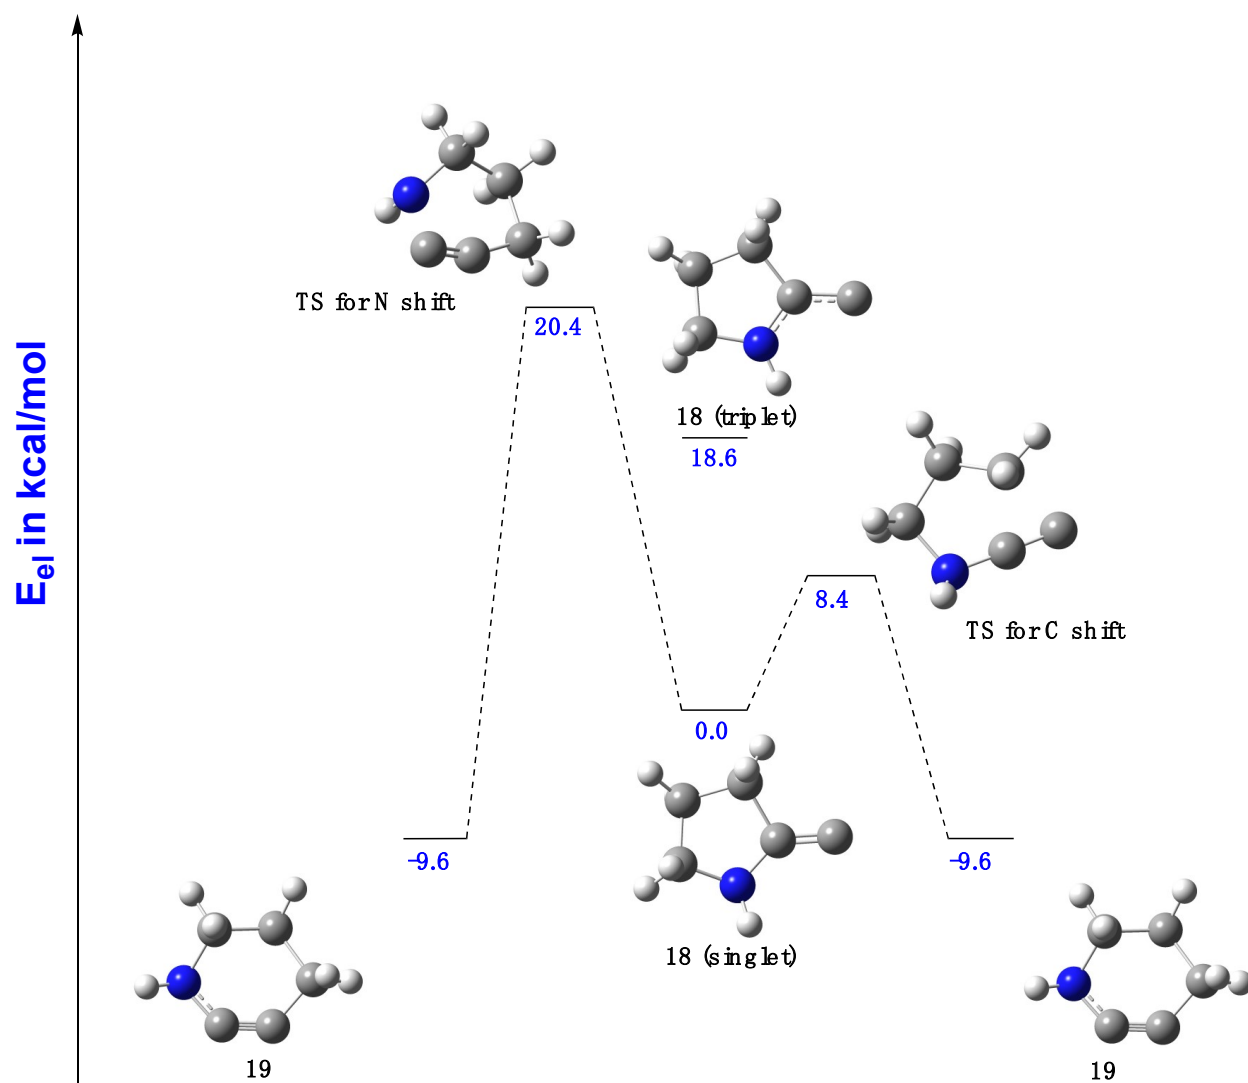

**Figure 4S.** CCSD(T)/cc-pVTZ//B3LYP/6-311+G\*\* structures and energies of singlet and triplet **18**, and the PES for the conversion of singlet **18** into 1-azacyclohex-2-yne (**19**) by two different pathways.

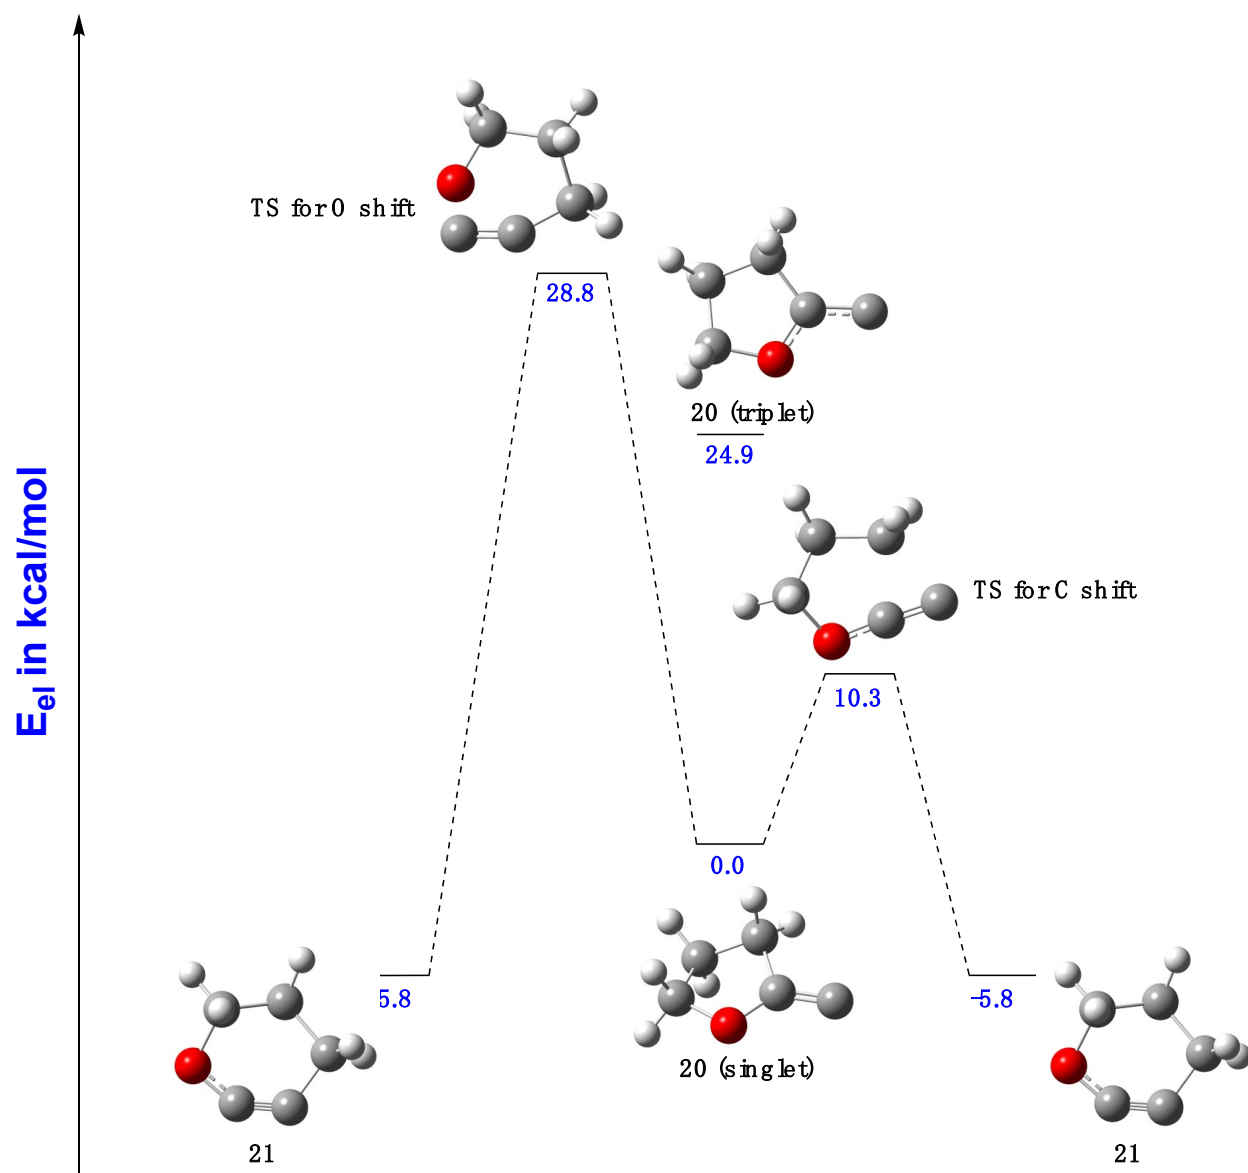

**Figure 5S.** CCSD(T)/cc-pVTZ//B3LYP/6-311+G\*\* structures and energies of singlet and triplet **20**, and the PES for the conversion of singlet **20** into 1-oxacyclohex-2-yne (**21**) by the two different pathways.

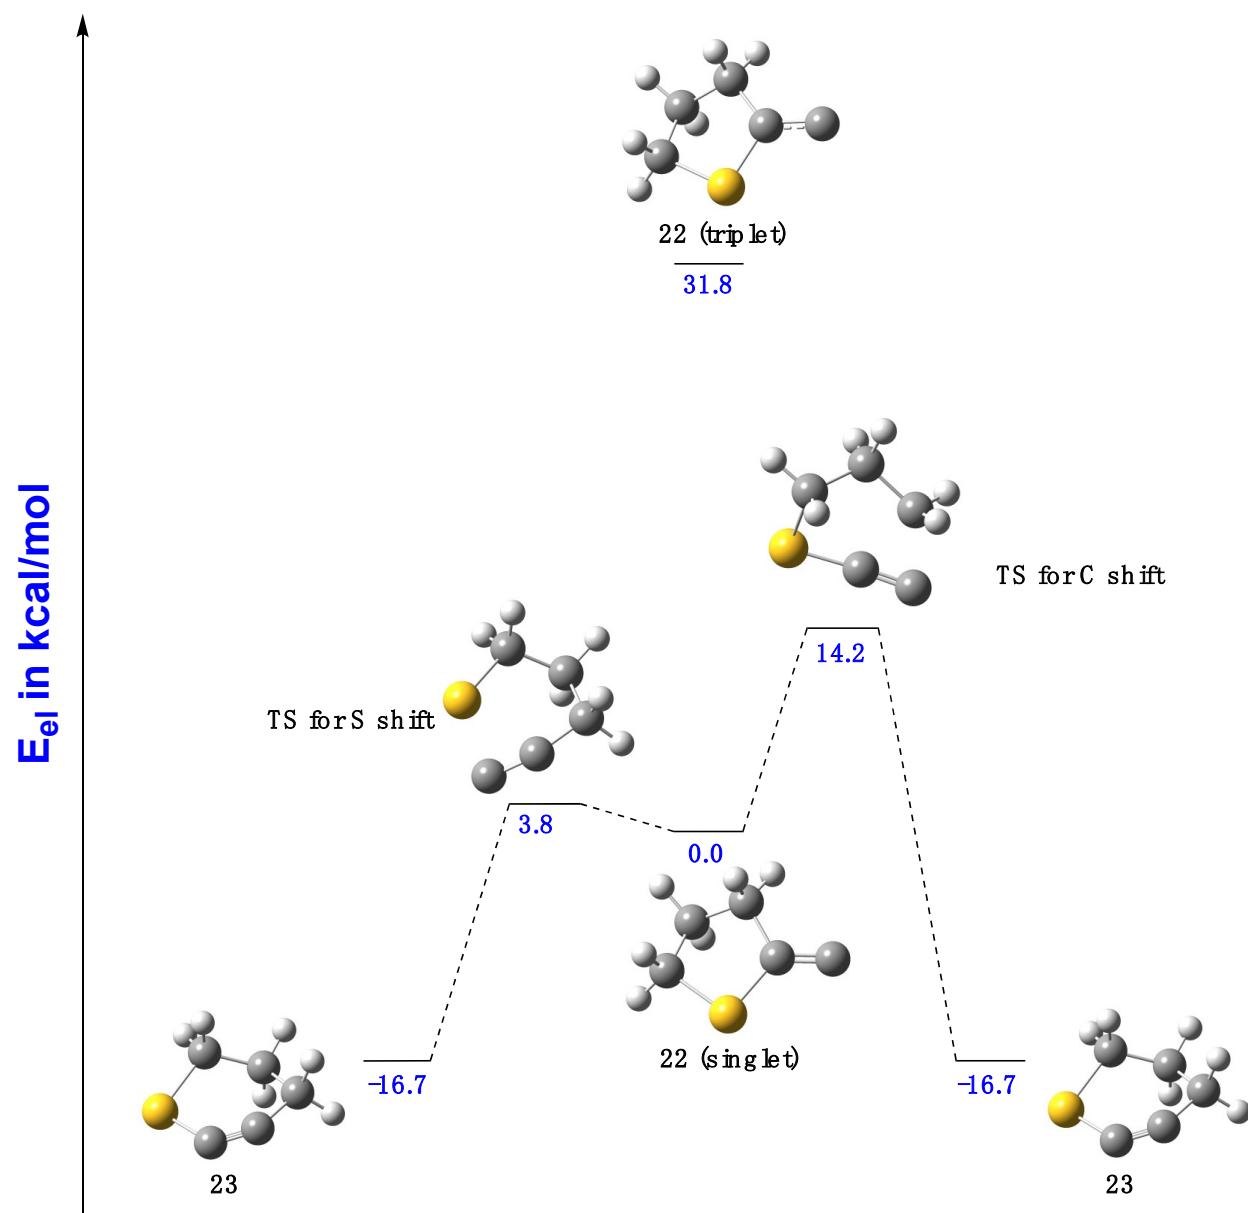

**Figure 6S.** CCSD(T)/cc-pVTZ//B3LYP/6-311+G\*\* structures and energies of singlet and triplet **22**, and the PES for the conversion of singlet **22** into 1-thiacyclohex-2-yne (**23**) by the two different pathways.

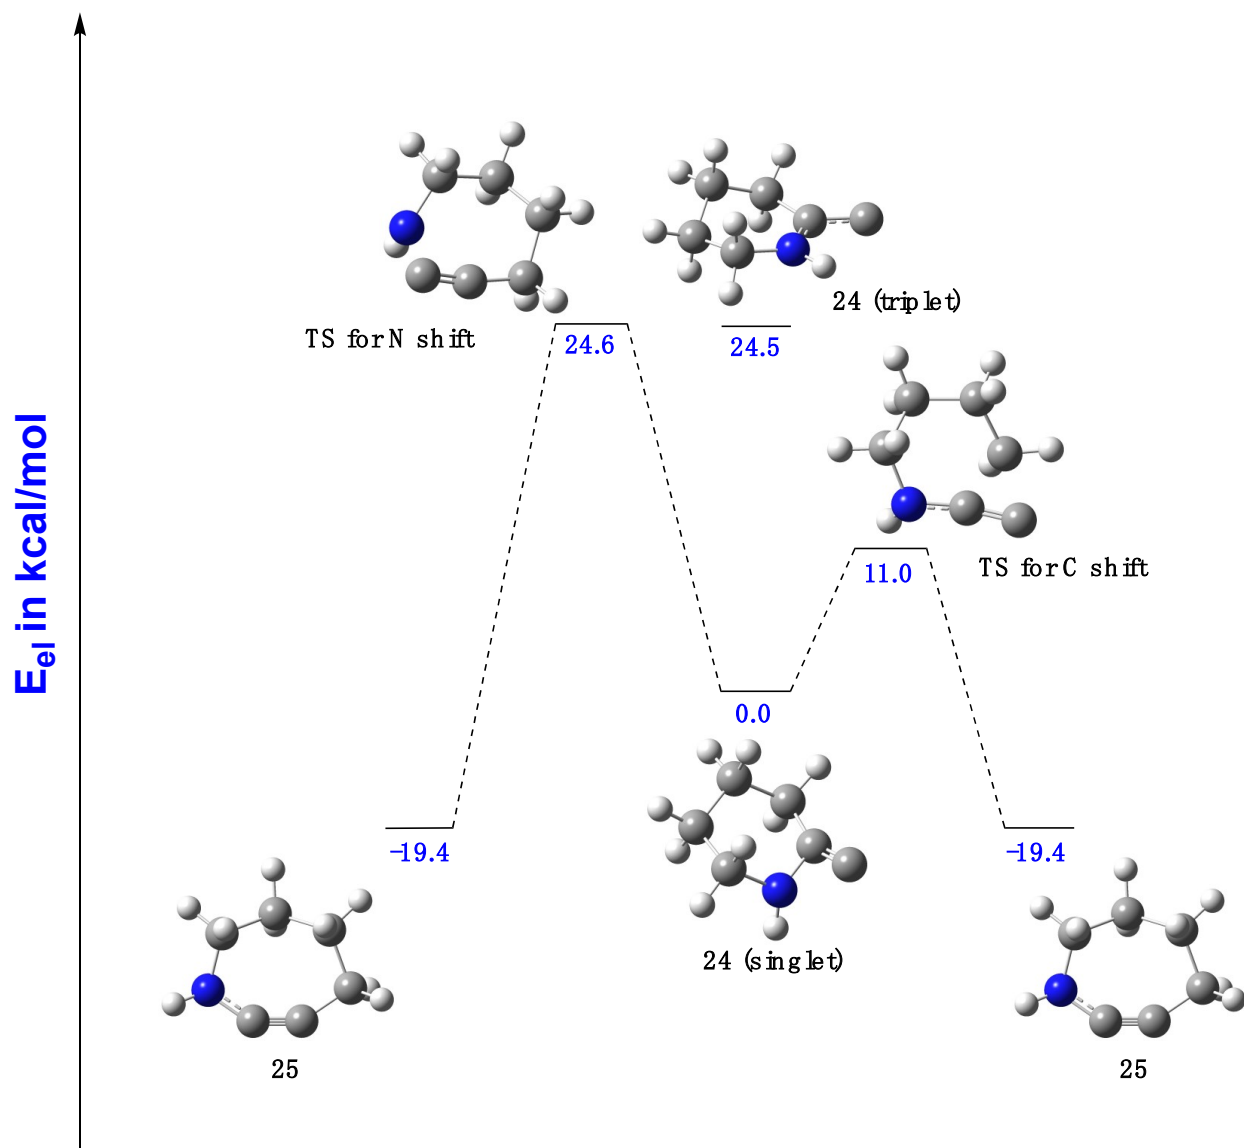

**Figure 7S.** CCSD(T)/cc-pVTZ//B3LYP/6-311+G\*\* structures and energies of singlet and triplet **24**, and the PES for the conversion of singlet **24** into 1-azacyclohept-2-yne (**25**) by two different pathways.

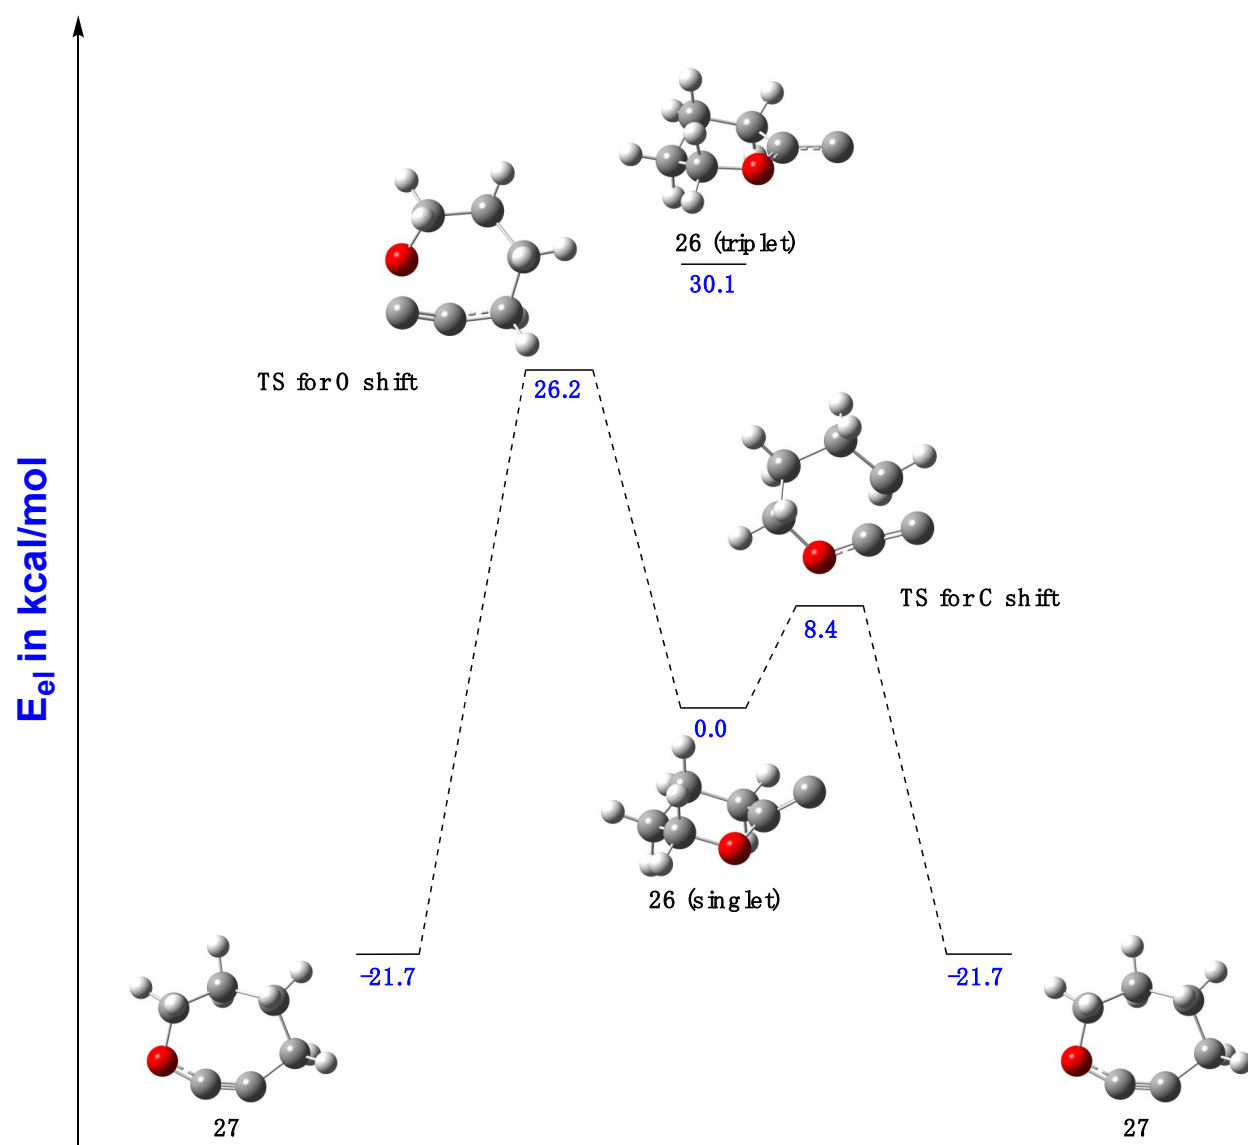

**Figure 8S.** CCSD(T)/cc-pVTZ//B3LYP/6-311+G\*\* structures and energies of singlet and triplet **26**, and the PES for the conversion of singlet **26** into 1-oxacyclohept-2-yne (**27**) by two different pathways.



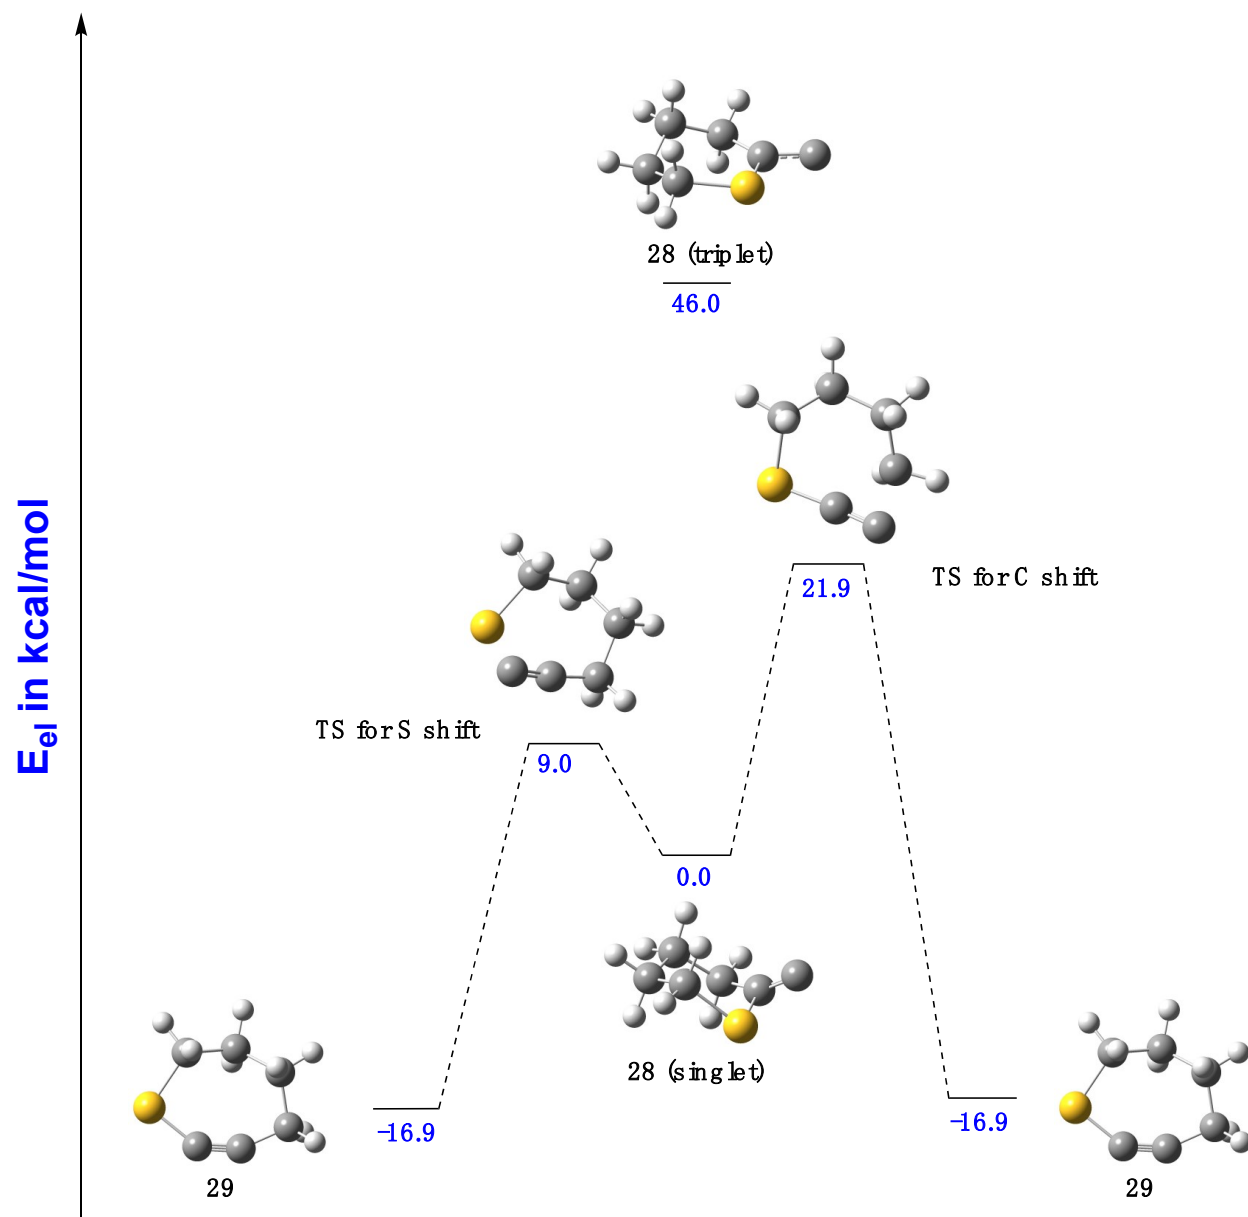

**Figure 9S.** CCSD(T)/cc-pVTZ//B3LYP/6-311+G\*\* structures and energies of singlet and triplet **28**, and the PES for the conversion of singlet **28** into 1-thiocyclohept-2-yne (**29**) by two different pathways.

## Coordinates and energies for (R/U)B3LYP/6-311+G\*\* optimized structures

---

### 2-(1-azacyclobutylidene)carbene (singlet 12)

---

Charge = 0 Multiplicity = 1

Redundant internal coordinates found in file. (old form).

C,0,-1.3434815232,0.0147533323,0.1402852988  
C,0,-0.2379572499,1.0896565029,-0.0747266241  
H,0,-1.6830348883,-0.0242641438,1.1796170693  
H,0,-2.2027682157,0.0437783301,-0.5312170138  
H,0,-0.0990219156,1.8224868533,0.7152555112  
H,0,-0.2730083851,1.5724541489,-1.0504527386  
C,0,0.7281045072,-0.1295351108,-0.0596359057  
C,0,2.0215570052,-0.0181197386,0.123912723  
N,0,-0.3477653565,-1.0369935763,-0.2036358798  
H,0,-0.3188259781,-1.8967225979,0.3323185597

|                                              |                             |
|----------------------------------------------|-----------------------------|
| Zero-point correction=                       | 0.079194 (Hartree/Particle) |
| Thermal correction to Energy=                | 0.084095                    |
| Thermal correction to Enthalpy=              | 0.085039                    |
| Thermal correction to Gibbs Free Energy=     | 0.051655                    |
| Sum of electronic and zero-point Energies=   | -209.969948                 |
| Sum of electronic and thermal Energies=      | -209.965047                 |
| Sum of electronic and thermal Enthalpies=    | -209.964103                 |
| Sum of electronic and thermal Free Energies= | -209.997487                 |

---

### 2-(1-azacyclobutylidene)carbene (triplet 12)

---

Charge = 0 Multiplicity = 3

Redundant internal coordinates found in file. (old form).

C,0,-1.3862301421,-0.1517682689,0.0004573112  
C,0,-0.4259379986,1.0743919483,0.0000769363  
H,0,-2.0002535077,-0.2767213623,0.8950689186  
H,0,-2.0007174549,-0.2769129977,-0.8938089894  
H,0,-0.4635073267,1.699540639,0.8921286289  
H,0,-0.4639698004,1.6993491644,-0.8920893321  
C,0,0.7245300461,0.0405062884,-0.0001105863  
C,0,2.1151718622,0.042496872,-0.0004717578  
N,0,-0.1743093164,-0.9846932569,0.0002320563  
H,0,-0.0175153615,-1.9861750263,0.0002988143

|                                              |                             |
|----------------------------------------------|-----------------------------|
| Zero-point correction=                       | 0.078286 (Hartree/Particle) |
| Thermal correction to Energy=                | 0.083137                    |
| Thermal correction to Enthalpy=              | 0.084081                    |
| Thermal correction to Gibbs Free Energy=     | 0.049861                    |
| Sum of electronic and zero-point Energies=   | -209.950101                 |
| Sum of electronic and thermal Energies=      | -209.945250                 |
| Sum of electronic and thermal Enthalpies=    | -209.944306                 |
| Sum of electronic and thermal Free Energies= | -209.978526                 |

S\*\*2 before annihilation 2.0085, after 2.0000

---

**1-azacyclopent-2-yne (13)**

---

Charge = 0 Multiplicity = 1

Redundant internal coordinates found in file. (old form).

C,0,-0.0134651444,1.090101456,0.1880164957  
C,0,1.2120788901,0.1466390134,-0.2396048864  
H,0,0.0787423647,1.3302768723,1.2516502472  
H,0,-0.103401599,2.0218007251,-0.377836391  
H,0,2.1434859555,0.4364235766,0.2486299962  
H,0,1.3558679457,0.1702248526,-1.3254182741  
C,0,0.5748107749,-1.119299598,0.3180465006  
C,0,-0.6555943474,-1.058271952,-0.1000602607  
N,0,-1.1738074709,0.1757870522,-0.0290783944  
H,0,-1.9640023693,0.4570490018,-0.5903210332

|                                              |                             |
|----------------------------------------------|-----------------------------|
| Zero-point correction=                       | 0.079286 (Hartree/Particle) |
| Thermal correction to Energy=                | 0.083900                    |
| Thermal correction to Enthalpy=              | 0.084845                    |
| Thermal correction to Gibbs Free Energy=     | 0.052323                    |
| Sum of electronic and zero-point Energies=   | -209.967193                 |
| Sum of electronic and thermal Energies=      | -209.962579                 |
| Sum of electronic and thermal Enthalpies=    | -209.961635                 |
| Sum of electronic and thermal Free Energies= | -209.994156                 |

---

**TS from singlet 12 to 13 by C shift**

---

Charge = 0 Multiplicity = 1

Redundant internal coordinates found in file. (old form).

C,0,-1.0508075951,0.601288151,0.0670123149  
H,0,-1.6561330026,0.9520666993,-0.768768218  
H,0,-1.47955625,0.9493807823,1.0063364359  
C,0,1.6587950421,-0.3771606182,0.0523225319  
C,0,0.4640457065,-0.7900647225,0.0038276945  
C,0,0.479523942,1.0027283925,-0.0835173536  
H,0,0.7116488876,1.4608488112,-1.0406552075  
H,0,0.8299367984,1.6042079988,0.7473029666  
N,0,-0.913381317,-0.8922185794,0.0789286198  
H,0,-1.3230682121,-1.3422479149,-0.7345947845

|                                              |                             |
|----------------------------------------------|-----------------------------|
| Zero-point correction=                       | 0.078555 (Hartree/Particle) |
| Thermal correction to Energy=                | 0.083153                    |
| Thermal correction to Enthalpy=              | 0.084098                    |
| Thermal correction to Gibbs Free Energy=     | 0.051118                    |
| Sum of electronic and zero-point Energies=   | -209.959693                 |
| Sum of electronic and thermal Energies=      | -209.955095                 |
| Sum of electronic and thermal Enthalpies=    | -209.954151                 |
| Sum of electronic and thermal Free Energies= | -209.987130                 |

\*\*\*\*\* 1 imaginary frequencies (negative Signs) \*\*\*\*\* -214.9654 cm<sup>-1</sup>

---

**TS from singlet 12 to 13 by N shift**

---

Charge = 0 Multiplicity = 1

Redundant internal coordinates found in file. (old form).

C,0,-0.7981904401,0.8207452227,0.1434498704  
C,0,-1.1186886546,-0.6753214085,-0.0554293063  
H,0,-1.2893157018,1.4735223308,-0.5774795277  
H,0,-1.0108084147,1.1696529027,1.1536164188  
H,0,-1.6603086997,-0.9042386417,-0.9754118204  
H,0,-1.6133262548,-1.1569658704,0.7887611033  
C,0,1.4964687103,-0.5123433683,0.209740181  
C,0,0.3354869228,-0.951785444,-0.1333990396  
N,0,0.7324674282,0.8780382005,-0.0539310289  
H,0,0.9578251042,1.1820040762,-0.9993418505

Zero-point correction= 0.077837 (Hartree/Particle)  
Thermal correction to Energy= 0.082367  
Thermal correction to Enthalpy= 0.083311  
Thermal correction to Gibbs Free Energy= 0.050786  
Sum of electronic and zero-point Energies= -209.943380  
Sum of electronic and thermal Energies= -209.938850  
Sum of electronic and thermal Enthalpies= -209.937906  
Sum of electronic and thermal Free Energies= -209.970431

\*\*\*\*\* 1 imaginary frequencies (negative Signs) \*\*\*\*\* -177.4897 cm<sup>-1</sup>

---

**2-(1-oxacyclobutylidene)carbene (singlet 14)**

---

Charge = 0 Multiplicity = 1

Redundant internal coordinates found in file. (old form).

C,0,1.3329680689,-0.0430833077,0.0000387537  
C,0,0.2697108711,1.0825019075,-0.000063949  
H,0,1.946750788,-0.1195303541,-0.8977177715  
H,0,1.9466911572,-0.1194229312,0.8978451924  
H,0,0.2354549277,1.6997020611,-0.8953376502  
H,0,0.2353955651,1.6998096096,0.8951333144  
C,0,-0.6997665874,-0.1145477956,-0.0000242849  
C,0,-2.0140048194,-0.0203072869,-0.0000732756  
O,0,0.2877380288,-1.0735359027,0.0000656707

Zero-point correction= 0.066643 (Hartree/Particle)  
Thermal correction to Energy= 0.071438  
Thermal correction to Enthalpy= 0.072382  
Thermal correction to Gibbs Free Energy= 0.038972  
Sum of electronic and zero-point Energies= -229.846258  
Sum of electronic and thermal Energies= -229.841464  
Sum of electronic and thermal Enthalpies= -229.840520  
Sum of electronic and thermal Free Energies= -229.873930

---

**2-(1-oxacyclobutylidene)carbene (triplet 14)**

---

Charge = 0 Multiplicity = 3

Redundant internal coordinates found in file. (old form).

C,0,1.3455341023,-0.1732413204,-0.0001468612  
C,0,0.4320278514,1.0623497026,0.0000018132  
H,0,1.9330857494,-0.3571673838,-0.8985637283  
H,0,1.9332391796,-0.3572703193,0.8981485782  
H,0,0.4674092284,1.6909738018,-0.8907498049  
H,0,0.4675612746,1.6908719201,0.8908192475  
C,0,-0.691232416,0.0359890661,0.0000389666  
C,0,-2.0833941972,0.0138692594,0.0001609859  
O,0,0.1475442276,-1.0377447265,-0.0000941971

|                                              |                             |
|----------------------------------------------|-----------------------------|
| Zero-point correction=                       | 0.065925 (Hartree/Particle) |
| Thermal correction to Energy=                | 0.070551                    |
| Thermal correction to Enthalpy=              | 0.071495                    |
| Thermal correction to Gibbs Free Energy=     | 0.037612                    |
| Sum of electronic and zero-point Energies=   | -229.821298                 |
| Sum of electronic and thermal Energies=      | -229.816672                 |
| Sum of electronic and thermal Enthalpies=    | -229.815728                 |
| Sum of electronic and thermal Free Energies= | -229.849611                 |

S\*\*2 before annihilation 2.0061, after 2.0000

---

**2-(1-thiocyclobutylidene)carbene (singlet 16)**

---

Charge = 0 Multiplicity = 1

Redundant internal coordinates found in file. (old form).

C,0,1.2762343398,0.6728282913,0.0796624426  
C,0,-0.1123381118,1.3380978301,-0.0663406191  
H,0,1.9787464138,0.8789287927,-0.7250371778  
H,0,1.7493577167,0.8362298021,1.0461528807  
H,0,-0.2418412372,1.8373387775,-1.0272447382  
H,0,-0.3692568679,2.0310119646,0.734657213  
C,0,-0.9179477315,0.0306644103,-0.0120657973  
C,0,-2.1977218051,-0.2111053983,0.0701176835  
S,0,0.5379252832,-1.0350834702,-0.0317428876

|                                              |                             |
|----------------------------------------------|-----------------------------|
| Zero-point correction=                       | 0.063888 (Hartree/Particle) |
| Thermal correction to Energy=                | 0.069249                    |
| Thermal correction to Enthalpy=              | 0.070193                    |
| Thermal correction to Gibbs Free Energy=     | 0.034423                    |
| Sum of electronic and zero-point Energies=   | -552.849794                 |
| Sum of electronic and thermal Energies=      | -552.844433                 |
| Sum of electronic and thermal Enthalpies=    | -552.843489                 |
| Sum of electronic and thermal Free Energies= | -552.879259                 |

---

**2-(1-thiocyclobutylidene)carbene (triplet 16)**

---

Charge = 0 Multiplicity = 3

Redundant internal coordinates found in file. (old form).

C,0,1.3385051591,0.5731893366,0.0000315234  
C,0,0.0014194279,1.3474805834,-0.0000233131  
H,0,1.9512159853,0.6934347918,-0.892067176

H,0,1.9511722132,0.6934855504,0.892153441  
H,0,-0.1536793272,1.9727536935,-0.8835599886  
H,0,-0.1537227691,1.9728037518,0.8834703153  
C,0,-0.8974865948,0.1191915481,-0.0000105758  
C,0,-2.249550458,-0.1163037502,-0.0000383151  
S,0,0.4530043635,-1.0546325054,0.000056089

Zero-point correction= 0.062845 (Hartree/Particle)  
Thermal correction to Energy= 0.067985  
Thermal correction to Enthalpy= 0.068929  
Thermal correction to Gibbs Free Energy= 0.033280  
Sum of electronic and zero-point Energies= -552.815247  
Sum of electronic and thermal Energies= -552.810108  
Sum of electronic and thermal Enthalpies= -552.809164  
Sum of electronic and thermal Free Energies= -552.844813

S\*\*2 before annihilation 2.0076, after 2.0000

---

### 1-thiocyclopent-2-yne (17)

---

Charge = 0 Multiplicity = 1  
Redundant internal coordinates found in file. (old form).  
C,0,-0.501734839,1.1279700589,0.1474603321  
C,0,-1.5723720238,0.021486764,-0.1748002788  
H,0,-0.5690369669,2.0082026147,-0.4923766803  
H,0,-0.5866824124,1.4260185432,1.1924217591  
H,0,-1.8483331517,0.0126082704,-1.2339152071  
H,0,-2.4665185751,0.1621805563,0.4326610898  
C,0,-0.7151893378,-1.1232095049,0.194002348  
C,0,0.495502539,-1.3463391895,0.0191558852  
S,0,1.2023049576,0.2692427569,-0.062877618

Zero-point correction= 0.064385 (Hartree/Particle)  
Thermal correction to Energy= 0.069498  
Thermal correction to Enthalpy= 0.070442  
Thermal correction to Gibbs Free Energy= 0.036087  
Sum of electronic and zero-point Energies= -552.854953  
Sum of electronic and thermal Energies= -552.849840  
Sum of electronic and thermal Enthalpies= -552.848895  
Sum of electronic and thermal Free Energies= -552.883251

---

### TS from singlet 16 to 17 by C shift

---

Charge = 0 Multiplicity = 1  
Redundant internal coordinates found in file. (old form).  
C,0,0.2382316316,1.2162003554,0.1546082513  
C,0,-1.2066288394,0.6919410836,-0.1708375193  
H,0,0.567919829,1.9999986033,-0.5252392274  
H,0,0.3209628877,1.5473062051,1.1883268096  
H,0,-1.4674395597,0.8561597048,-1.2130386373  
H,0,-1.9314021673,1.1488280111,0.4962262831  
C,0,-0.3596170726,-0.9489696869,0.0641635132  
C,0,-1.6187047928,-1.0030232455,0.1116168326  
S,0,1.2618960834,-0.3305490308,-0.0562403056

Zero-point correction= 0.063074 (Hartree/Particle)  
 Thermal correction to Energy= 0.067927  
 Thermal correction to Enthalpy= 0.068871  
 Thermal correction to Gibbs Free Energy= 0.034801  
 Sum of electronic and zero-point Energies= -552.831095  
 Sum of electronic and thermal Energies= -552.826242  
 Sum of electronic and thermal Enthalpies= -552.825298  
 Sum of electronic and thermal Free Energies= -552.859368

\*\*\*\*\* 1 imaginary frequencies (negative Signs) \*\*\*\*\* -322.2747 cm<sup>-1</sup>

---

### TS from singlet 16 to 17 by S shift

---

Charge = 0 Multiplicity = 1  
 Redundant internal coordinates found in file. (old form).  
 C,0,1.0839889987,-0.7302133491,0.3379619976  
 C,0,1.2934530751,0.7013548745,-0.2046436451  
 H,0,1.6549930175,-1.5148280949,-0.1550361397  
 H,0,1.1841184868,-0.7904347561,1.4208593357  
 H,0,1.6701275462,0.688320986,-1.2303074566  
 H,0,1.918574232,1.3557940776,0.4051659911  
 C,0,-0.1517248201,1.0479838293,-0.1482538389  
 C,0,-1.3212357328,1.2517309979,0.3359073751  
 S,0,-0.7403759134,-0.8357556852,-0.1499532293

Zero-point correction= 0.063334 (Hartree/Particle)  
 Thermal correction to Energy= 0.068149  
 Thermal correction to Enthalpy= 0.069093  
 Thermal correction to Gibbs Free Energy= 0.035138  
 Sum of electronic and zero-point Energies= -552.845288  
 Sum of electronic and thermal Energies= -552.840473  
 Sum of electronic and thermal Enthalpies= -552.839529  
 Sum of electronic and thermal Free Energies= -552.873484

\*\*\*\*\* 1 imaginary frequencies (negative Signs) \*\*\*\*\* -145.7311 cm<sup>-1</sup>

---

### 2-(1-azacyclopentylidene)carbene (singlet 18)

---

Charge = 0 Multiplicity = 1  
 Redundant internal coordinates found in file. (old form).  
 C,0,0.204379168,1.1953633373,0.1616022746  
 C,0,-1.2313074195,0.7790540418,-0.2319740067  
 C,0,-1.3040813368,-0.6883707232,0.1928631825  
 H,0,0.6007227346,2.0079658705,-0.444785303  
 H,0,0.247889326,1.4928184723,1.2116929624  
 H,0,-1.3645071445,0.8591060529,-1.3130448331  
 H,0,-1.9811857444,1.4020170407,0.258914908  
 H,0,-1.4989737158,-0.7720433863,1.2720353271  
 H,0,-2.0702950594,-1.2538812752,-0.3418984517  
 C,0,0.9690278167,-0.1382029342,-0.0239504344  
 C,0,2.2817732804,-0.054583648,-0.0284677879  
 N,0,0.0339640788,-1.1732435467,-0.1758278253  
 H,0,0.310070016,-2.0821983019,0.1679479876

|                                              |                             |
|----------------------------------------------|-----------------------------|
| Zero-point correction=                       | 0.108975 (Hartree/Particle) |
| Thermal correction to Energy=                | 0.114712                    |
| Thermal correction to Enthalpy=              | 0.115656                    |
| Thermal correction to Gibbs Free Energy=     | 0.079884                    |
| Sum of electronic and zero-point Energies=   | -249.300248                 |
| Sum of electronic and thermal Energies=      | -249.294511                 |
| Sum of electronic and thermal Enthalpies=    | -249.293566                 |
| Sum of electronic and thermal Free Energies= | -249.329338                 |

---

## 2-(1-azacyclopentylidene)carbene (triplet 18)

---

Charge = 0 Multiplicity = 3  
 Redundant internal coordinates found in file. (old form).  
 C,0,0.04501099,1.2250798078,0.1506510568  
 C,0,-1.3538987917,0.6727353707,-0.1984288753  
 C,0,-1.2487483735,-0.8336728046,0.1138151363  
 H,0,0.3622761135,2.0516397587,-0.4848884235  
 H,0,0.0984978092,1.5753111397,1.1876771229  
 H,0,-1.5535013005,0.8115741954,-1.2636984198  
 H,0,-2.1596659737,1.1514714351,0.3591721472  
 H,0,-1.5660752985,-1.0660843108,1.1377957616  
 H,0,-1.823294786,-1.4611130379,-0.570936861  
 C,0,0.972035858,0.0250184646,-0.0006052411  
 C,0,2.3744833036,-0.0090923939,-0.0766819961  
 N,0,0.1867081398,-1.0777267538,-0.0336476845  
 H,0,0.6019443098,-1.999904871,-0.0604757235

|                                              |                             |
|----------------------------------------------|-----------------------------|
| Zero-point correction=                       | 0.108790 (Hartree/Particle) |
| Thermal correction to Energy=                | 0.114388                    |
| Thermal correction to Enthalpy=              | 0.115333                    |
| Thermal correction to Gibbs Free Energy=     | 0.078919                    |
| Sum of electronic and zero-point Energies=   | -249.279114                 |
| Sum of electronic and thermal Energies=      | -249.273515                 |
| Sum of electronic and thermal Enthalpies=    | -249.272571                 |
| Sum of electronic and thermal Free Energies= | -249.308985                 |

S\*\*2 before annihilation 2.0084, after 2.0000

---

## 1-azacyclohex-2-yne (19)

---

Charge = 0 Multiplicity = 1  
 Redundant internal coordinates found in file. (old form).  
 C,0,1.5801199842,-0.1711593695,0.154686294  
 C,0,0.6764763933,1.053711776,-0.2734712036  
 C,0,-0.7789794766,1.0165966826,0.2388616292  
 H,0,2.4678792862,-0.2126947698,-0.4816635095  
 H,0,1.9203627714,-0.0780343107,1.1906334777  
 H,0,0.6643938607,1.0992500263,-1.3655685671  
 H,0,1.1359727407,1.9798275459,0.0894974271  
 H,0,-0.7798162732,1.0932894028,1.3341093258  
 H,0,-1.3269062506,1.8705644388,-0.1675990901  
 C,0,0.6153236727,-1.2780437356,-0.0304408689  
 C,0,-0.6045433896,-1.2490334028,-0.0238053568  
 N,0,-1.5155951705,-0.2351992862,-0.1863090515  
 H,0,-2.4037331488,-0.3407059977,0.2891664938



|                                              |                             |
|----------------------------------------------|-----------------------------|
| Zero-point correction=                       | 0.109574 (Hartree/Particle) |
| Thermal correction to Energy=                | 0.115199                    |
| Thermal correction to Enthalpy=              | 0.116143                    |
| Thermal correction to Gibbs Free Energy=     | 0.080765                    |
| Sum of electronic and zero-point Energies=   | -249.312124                 |
| Sum of electronic and thermal Energies=      | -249.306498                 |
| Sum of electronic and thermal Enthalpies=    | -249.305554                 |
| Sum of electronic and thermal Free Energies= | -249.340933                 |

---

#### TS from singlet 18 to 19 by C shift

---

Charge = 0 Multiplicity = 1  
 Redundant internal coordinates found in file. (old form).  
 C,0,0.7379620457,0.957767942,0.4160518772  
 C,0,-0.6462199006,1.1600434603,-0.2138604095  
 C,0,-1.4659201088,-0.1475098909,-0.0984367656  
 H,0,1.4315142125,1.7350422499,0.1137558038  
 H,0,0.7274989674,0.8906236897,1.504589675  
 H,0,-0.5123326632,1.424808252,-1.2646327513  
 H,0,-1.1653521085,1.992272287,0.2723125513  
 H,0,-2.1447566002,-0.1325976597,0.7573768472  
 H,0,-2.0595533056,-0.321896811,-0.997863129  
 C,0,0.7655960805,-0.7894115341,-0.0601168739  
 C,0,1.9079355719,-0.3420070543,-0.3793588594  
 N,0,-0.4912819323,-1.2634124156,0.0960205072  
 H,0,-0.6346212586,-1.7789765153,0.956380527

|                                              |                             |
|----------------------------------------------|-----------------------------|
| Zero-point correction=                       | 0.107746 (Hartree/Particle) |
| Thermal correction to Energy=                | 0.113225                    |
| Thermal correction to Enthalpy=              | 0.114169                    |
| Thermal correction to Gibbs Free Energy=     | 0.078937                    |
| Sum of electronic and zero-point Energies=   | -249.286835                 |
| Sum of electronic and thermal Energies=      | -249.281356                 |
| Sum of electronic and thermal Enthalpies=    | -249.280411                 |
| Sum of electronic and thermal Free Energies= | -249.315643                 |

\*\*\*\*\* 1 imaginary frequencies (negative Signs) \*\*\*\*\* -371.7409 cm<sup>-1</sup>

---

#### TS from singlet 18 to 19 by N shift

---

Charge = 0 Multiplicity = 1  
 Redundant internal coordinates found in file. (old form).  
 C,0,-0.1559886935,1.2380260113,-0.312835786  
 C,0,-1.3592741415,0.4073033433,0.1485284961  
 H,0,-0.0660258128,1.2139966119,-1.4021516228  
 H,0,-0.2585085983,2.2853527431,-0.0098325972  
 H,0,-1.5513057704,0.5953738322,1.2089139527  
 H,0,-2.2750755554,0.6402082916,-0.4031489732  
 C,0,0.4739795814,-1.0845474194,0.0384050371  
 C,0,1.6707064184,-0.7223541797,-0.1965627876  
 N,0,1.1194619027,0.7537082528,0.2368813335  
 H,0,1.1650826057,0.8436087556,1.2476017254  
 C,0,-0.978390235,-1.1134175493,-0.021734596  
 H,0,-1.3114794445,-1.4876382078,-0.9947305891  
 H,0,-1.4452212568,-1.7168704857,0.7603964069

Zero-point correction= 0.107442 (Hartree/Particle)  
 Thermal correction to Energy= 0.112765  
 Thermal correction to Enthalpy= 0.113709  
 Thermal correction to Gibbs Free Energy= 0.078989  
 Sum of electronic and zero-point Energies= -249.268946  
 Sum of electronic and thermal Energies= -249.263623  
 Sum of electronic and thermal Enthalpies= -249.262679  
 Sum of electronic and thermal Free Energies= -249.297399

\*\*\*\*\* 1 imaginary frequencies (negative Signs) \*\*\*\*\* -437.7413 cm<sup>-1</sup>

---

### 2-(1-oxacyclopentylidene)carbene (singlet 20)

---

Charge = 0 Multiplicity = 1  
 Redundant internal coordinates found in file. (old form).  
 C,0,0.2087729331,1.1685864567,0.2411367587  
 C,0,-1.1897776504,0.7821773645,-0.283983928  
 C,0,-1.2918310993,-0.6866587101,0.1158120142  
 H,0,0.6573295913,2.0111021805,-0.2823234713  
 H,0,0.1803517348,1.3942616901,1.310788696  
 H,0,-1.229866693,0.8875609837,-1.3703672414  
 H,0,-1.9777020584,1.3956874821,0.1573826539  
 H,0,-1.6182391816,-0.8105279529,1.153408344  
 H,0,-1.9245462534,-1.2893331171,-0.535478451  
 O,0,0.0600988548,-1.2061985219,-0.0032342022  
 C,0,0.9365646437,-0.1633400623,0.0152748799  
 C,0,2.2416361784,-0.0907127932,-0.1559990528

Zero-point correction= 0.096347 (Hartree/Particle)  
 Thermal correction to Energy= 0.101896  
 Thermal correction to Enthalpy= 0.102840  
 Thermal correction to Gibbs Free Energy= 0.067392  
 Sum of electronic and zero-point Energies= -269.175921  
 Sum of electronic and thermal Energies= -269.170372  
 Sum of electronic and thermal Enthalpies= -269.169428  
 Sum of electronic and thermal Free Energies= -269.204876

---

### 2-(1-oxacyclopentylidene)carbene (triplet 20)

---

Charge = 0 Multiplicity = 3  
 Redundant internal coordinates found in file. (old form).  
 C,0,0.0437227641,1.2043256594,0.1646821882  
 C,0,-1.3436495503,0.6604929813,-0.2158071001  
 C,0,-1.2097558894,-0.825622935,0.1196305138  
 H,0,0.3866395943,2.0399285942,-0.445269442  
 H,0,0.0841547337,1.5308897936,1.2112287395  
 H,0,-1.524376051,0.7936087123,-1.2849475886  
 H,0,-2.1612041924,1.1330420497,0.3299759148  
 H,0,-1.4683617635,-1.0534663537,1.1573671639  
 H,0,-1.7493827121,-1.5008996341,-0.5424641883  
 O,0,0.2111544968,-1.1199936653,-0.0380323713  
 C,0,0.9482874064,0.0012088257,0.002938429  
 C,0,2.3520011634,-0.0377020281,-0.0914192588

|                                              |                             |
|----------------------------------------------|-----------------------------|
| Zero-point correction=                       | 0.095879 (Hartree/Particle) |
| Thermal correction to Energy=                | 0.101324                    |
| Thermal correction to Enthalpy=              | 0.102268                    |
| Thermal correction to Gibbs Free Energy=     | 0.066076                    |
| Sum of electronic and zero-point Energies=   | -269.144925                 |
| Sum of electronic and thermal Energies=      | -269.139481                 |
| Sum of electronic and thermal Enthalpies=    | -269.138536                 |
| Sum of electronic and thermal Free Energies= | -269.174728                 |

S\*\*2 before annihilation 2.0060, after 2.0000

---

### 1-oxacyclohex-2-yne (21)

---

Charge = 0 Multiplicity = 1  
 Redundant internal coordinates found in file. (old form).  
 C,0,1.5625390274,-0.0688921083,0.0735734479  
 C,0,0.5670270373,1.101748721,-0.2616312055  
 C,0,-0.8588523436,0.9325484628,0.2968527262  
 H,0,2.3350341408,-0.1248401392,-0.6970509432  
 H,0,2.0750889139,0.0871340593,1.0270772542  
 H,0,0.500710951,1.2116551611,-1.3477163974  
 H,0,0.9525894029,2.0468895061,0.1378460466  
 H,0,-0.8652794736,0.8987743806,1.3888251616  
 H,0,-1.5282465909,1.7127679354,-0.0625153623  
 O,0,-1.5078627164,-0.3445003116,-0.1631043206  
 C,0,0.6766213477,-1.2812849859,0.1422488914  
 C,0,-0.5151676966,-1.1968286813,-0.107892299

|                                              |                             |
|----------------------------------------------|-----------------------------|
| Zero-point correction=                       | 0.096780 (Hartree/Particle) |
| Thermal correction to Energy=                | 0.102216                    |
| Thermal correction to Enthalpy=              | 0.103160                    |
| Thermal correction to Gibbs Free Energy=     | 0.068293                    |
| Sum of electronic and zero-point Energies=   | -269.182101                 |
| Sum of electronic and thermal Energies=      | -269.176666                 |
| Sum of electronic and thermal Enthalpies=    | -269.175722                 |
| Sum of electronic and thermal Free Energies= | -269.210588                 |

---

### TS from singlet 20 to 21 by C shift

---

Charge = 0 Multiplicity = 1  
 Redundant internal coordinates found in file. (old form).  
 C,0,0.7388575093,1.084288393,0.0535966108  
 C,0,-0.7885113387,1.0735884174,-0.2082080981  
 C,0,-1.3756554285,-0.2366491077,0.3028467111  
 H,0,1.2546716003,1.6617428787,-0.7059548513  
 H,0,0.967802734,1.4599581836,1.045949454  
 H,0,-0.9823575004,1.1521773275,-1.2800459556  
 H,0,-1.2476716901,1.9348113353,0.2855178559  
 H,0,-1.3656647998,-0.3053230362,1.3943503438  
 H,0,-2.3660236442,-0.4750975999,-0.0799561073  
 O,0,-0.4659389468,-1.2525237585,-0.2317865969  
 C,0,0.7433544684,-0.7768146341,-0.0742453787  
 C,0,1.9256040366,-0.3787033992,0.1238980123

Zero-point correction= 0.095460 (Hartree/Particle)  
 Thermal correction to Energy= 0.100693  
 Thermal correction to Enthalpy= 0.101637  
 Thermal correction to Gibbs Free Energy= 0.066827  
 Sum of electronic and zero-point Energies= -269.158799  
 Sum of electronic and thermal Energies= -269.153567  
 Sum of electronic and thermal Enthalpies= -269.152622  
 Sum of electronic and thermal Free Energies= -269.187432

\*\*\*\*\* 1 imaginary frequencies (negative Signs) \*\*\*\*\* -350.7228 cm<sup>-1</sup>

---

### TS from singlet 20 to 21 by O shift

---

Charge = 0 Multiplicity = 1  
 Redundant internal coordinates found in file. (old form).  
 C,0,1.0803852866,-1.0172040215,-0.0031061124  
 C,0,1.2768184249,0.5573960609,0.0759093903  
 C,0,-0.0429865471,1.2365830487,-0.2801526366  
 H,0,1.4304767921,-1.3932463458,-0.9697325139  
 H,0,1.635024741,-1.516220777,0.7936657749  
 H,0,2.0935242162,0.8660558171,-0.5817140532  
 H,0,1.548111924,0.805352173,1.1036506041  
 H,0,-0.0645764775,2.2738591383,0.064900472  
 H,0,-0.2390870763,1.2109126999,-1.3572439051  
 O,0,-1.1124250748,0.5880590649,0.4249953534  
 C,0,-0.3597119826,-1.1518529508,0.0807951632  
 C,0,-1.5384342264,-0.7834449076,-0.2825535368

Zero-point correction= 0.094429 (Hartree/Particle)  
 Thermal correction to Energy= 0.099618  
 Thermal correction to Enthalpy= 0.100562  
 Thermal correction to Gibbs Free Energy= 0.066078  
 Sum of electronic and zero-point Energies= -269.133868  
 Sum of electronic and thermal Energies= -269.128679  
 Sum of electronic and thermal Enthalpies= -269.127735  
 Sum of electronic and thermal Free Energies= -269.162218

\*\*\*\*\* 1 imaginary frequencies (negative Signs) \*\*\*\*\* -440.9571 cm<sup>-1</sup>

---

### 2-(1-thiocyclopentylidene)carbene (singlet 22)

---

Charge = 0 Multiplicity = 1  
 Redundant internal coordinates found in file. (old form).  
 C,0,0.2829570169,1.3880765267,0.3054378565  
 C,0,-1.0952757094,1.1459823809,-0.3277961893  
 C,0,-1.5374614623,-0.2539465166,0.0945935172  
 H,0,0.7864228914,2.265180294,-0.1028709177  
 H,0,0.1952511433,1.5151103706,1.3889720342  
 H,0,-1.0150166602,1.2001655137,-1.4162525425  
 H,0,-1.8146858543,1.9032384746,-0.0010603277  
 H,0,-1.9174401087,-0.2685129645,1.117292798  
 H,0,-2.2856291626,-0.683620438,-0.5714667059  
 C,0,1.0635571561,0.0967911805,0.0294520533  
 C,0,2.3473540219,0.1630305317,-0.2014891915  
 S,0,-0.019155272,-1.3232693537,0.0144566154

|                                              |                             |
|----------------------------------------------|-----------------------------|
| Zero-point correction=                       | 0.093289 (Hartree/Particle) |
| Thermal correction to Energy=                | 0.099375                    |
| Thermal correction to Enthalpy=              | 0.100319                    |
| Thermal correction to Gibbs Free Energy=     | 0.063139                    |
| Sum of electronic and zero-point Energies=   | -592.174055                 |
| Sum of electronic and thermal Energies=      | -592.167969                 |
| Sum of electronic and thermal Enthalpies=    | -592.167025                 |
| Sum of electronic and thermal Free Energies= | -592.204205                 |

---

## 2-(1-thiocyclopentylidene)carbene (triplet 22)

---

Charge = 0 Multiplicity = 3  
 Redundant internal coordinates found in file. (old form).  
 C,0,0.0324947051,1.4314869789,0.2016221376  
 C,0,-1.3369975979,0.9431741628,-0.287245427  
 C,0,-1.4843979272,-0.5158292391,0.1619671626  
 H,0,0.3866523774,2.316603978,-0.3293151624  
 H,0,-0.0016352086,1.6902234297,1.2684557664  
 H,0,-1.373872599,0.9914077622,-1.379260095  
 H,0,-2.1568129813,1.5531561478,0.1010010703  
 H,0,-1.763689149,-0.5995750804,1.214994925  
 H,0,-2.1915262716,-1.0899669182,-0.4365569235  
 C,0,1.0281144952,0.2940573252,0.0262116726  
 C,0,2.41220224,0.3616764627,-0.0923710943  
 S,0,0.1996819169,-1.2468440096,-0.0304150322

|                                              |                             |
|----------------------------------------------|-----------------------------|
| Zero-point correction=                       | 0.092570 (Hartree/Particle) |
| Thermal correction to Energy=                | 0.098460                    |
| Thermal correction to Enthalpy=              | 0.099404                    |
| Thermal correction to Gibbs Free Energy=     | 0.061872                    |
| Sum of electronic and zero-point Energies=   | -592.134052                 |
| Sum of electronic and thermal Energies=      | -592.128162                 |
| Sum of electronic and thermal Enthalpies=    | -592.127217                 |
| Sum of electronic and thermal Free Energies= | -592.164750                 |

S\*\*2 before annihilation 2.0070, after 2.0000

---

## 1-thiocyclohex-2-yne (23)

---

Charge = 0 Multiplicity = 1  
 Redundant internal coordinates found in file. (old form).  
 C,0,1.8552487155,-0.3718766797,0.0828027618  
 C,0,1.1352458761,0.975649674,-0.3262845583  
 C,0,-0.2322109873,1.2328416327,0.3269386092  
 H,0,2.6170330278,-0.6074840261,-0.6650713865  
 H,0,2.3576220013,-0.2832954401,1.0507592807  
 H,0,1.0221527393,0.9857006251,-1.4129830376  
 H,0,1.7980639859,1.8043628721,-0.0539050773  
 H,0,-0.1465729517,1.2605664566,1.4153751157  
 H,0,-0.6365954684,2.1877582749,-0.0169618075  
 C,0,0.7336964774,-1.3036259925,0.1188967933  
 C,0,-0.4768832606,-1.3547119677,-0.0255062013  
 S,0,-1.568988155,-0.0262724292,-0.0859754922

Zero-point correction= 0.094213 (Hartree/Particle)  
 Thermal correction to Energy= 0.100057  
 Thermal correction to Enthalpy= 0.101001  
 Thermal correction to Gibbs Free Energy= 0.064826  
 Sum of electronic and zero-point Energies= -592.197745  
 Sum of electronic and thermal Energies= -592.191900  
 Sum of electronic and thermal Enthalpies= -592.190956  
 Sum of electronic and thermal Free Energies= -592.227131

---

**TS from singlet 22 to 23 by C shift**

---

Charge = 0 Multiplicity = 1  
 Redundant internal coordinates found in file. (old form).  
 C,0,1.5556213118,0.4074265101,-0.0231084347  
 C,0,0.4252492382,1.4217228251,-0.2974535564  
 C,0,-0.8728616958,1.0833160487,0.4287673719  
 H,0,2.295953292,0.4465649693,-0.8157711835  
 H,0,2.0152899814,0.5928628366,0.9429991802  
 H,0,0.2262029393,1.4731433103,-1.3700091706  
 H,0,0.7902097534,2.4066942213,0.0183380309  
 H,0,-0.756081879,1.0745450443,1.5135112652  
 H,0,-1.7016173287,1.7371801026,0.1558079741  
 C,0,0.3453183541,-1.0800057136,0.0039475828  
 C,0,1.5382882853,-1.4418163974,0.1996912681  
 S,0,-1.301828252,-0.6305857573,-0.143178328

Zero-point correction= 0.092311 (Hartree/Particle)  
 Thermal correction to Energy= 0.098023  
 Thermal correction to Enthalpy= 0.098967  
 Thermal correction to Gibbs Free Energy= 0.062662  
 Sum of electronic and zero-point Energies= -592.150162  
 Sum of electronic and thermal Energies= -592.144450  
 Sum of electronic and thermal Enthalpies= -592.143506  
 Sum of electronic and thermal Free Energies= -592.179811

\*\*\*\*\* 1 imaginary frequencies (negative Signs) \*\*\*\*\* -402.6099 cm<sup>-1</sup>

---

**TS from singlet 22 to 23 by S shift**

---

Charge = 0 Multiplicity = 1  
 Redundant internal coordinates found in file. (old form).  
 C,0,-1.4080397055,0.8068128264,0.3916688735  
 C,0,-1.4926576329,-0.571706169,-0.3264805448  
 C,0,-0.2252813587,-1.399392987,-0.0728661301  
 H,0,-2.1715543054,1.4940571138,0.0145066633  
 H,0,-1.5438442154,0.7144071387,1.4736357863  
 H,0,-1.5963906083,-0.3831479845,-1.3963752787  
 H,0,-2.3780316354,-1.1235786352,0.0035188286  
 H,0,-0.3059612606,-1.9806101322,0.8472133954  
 H,0,-0.0336628028,-2.0791518605,-0.9028964357  
 C,0,-0.0796454326,1.2915061708,0.0621471969  
 C,0,1.0082819713,1.3828024577,-0.5809147135  
 S,0,1.3256218163,-0.356100509,0.1912460089

Zero-point correction= 0.092575 (Hartree/Particle)  
 Thermal correction to Energy= 0.098224  
 Thermal correction to Enthalpy= 0.099168  
 Thermal correction to Gibbs Free Energy= 0.063090  
 Sum of electronic and zero-point Energies= -592.168769  
 Sum of electronic and thermal Energies= -592.163119  
 Sum of electronic and thermal Enthalpies= -592.162175  
 Sum of electronic and thermal Free Energies= -592.198253

\*\*\*\*\* 1 imaginary frequencies (negative Signs) \*\*\*\*\* -294.0750 cm<sup>-1</sup>

---

### 2-(1-azacyclohexylidene)carbene (singlet 24)

---

Charge = 0 Multiplicity = 1  
 Redundant internal coordinates found in file. (old form).  
 C,0,1.3862145681,0.762912824,-0.3248493105  
 C,0,0.1752632336,1.5151824202,0.2855326324  
 C,0,0.143924951,-1.4742375228,-0.1920327481  
 C,0,1.4465874953,-0.7152644454,0.113978509  
 H,0,0.3481126669,1.695983249,1.3542486138  
 H,0,0.0370464027,2.4868182186,-0.1940240154  
 H,0,1.3069284391,0.8102257862,-1.4161595103  
 H,0,2.3159502512,1.268101041,-0.0474700284  
 H,0,0.1674340842,-2.4898513645,0.211577214  
 H,0,-0.0222269872,-1.5428591385,-1.2713346749  
 H,0,1.6429410071,-0.7693931839,1.1922476568  
 H,0,2.2839933715,-1.2151269266,-0.3832046944  
 C,0,-1.0216065341,0.6638577678,0.0934040454  
 C,0,-2.0917563363,0.2643004462,-0.5501837014  
 N,0,-1.0000030741,-0.756051324,0.3852311428  
 H,0,-1.3113925392,-1.0522078473,1.3018758692

Zero-point correction= 0.138648 (Hartree/Particle)  
 Thermal correction to Energy= 0.145001  
 Thermal correction to Enthalpy= 0.145945  
 Thermal correction to Gibbs Free Energy= 0.108938  
 Sum of electronic and zero-point Energies= -288.604834  
 Sum of electronic and thermal Energies= -288.598481  
 Sum of electronic and thermal Enthalpies= -288.597537  
 Sum of electronic and thermal Free Energies= -288.634544

---

### 2-(1-azacyclohexylidene)carbene (triplet 24)

---

Charge = 0 Multiplicity = 3  
 Redundant internal coordinates found in file. (old form).  
 C,0,1.0352933971,1.1976696921,-0.3202902861  
 C,0,-0.4283832672,1.310233324,0.1268308305  
 C,0,0.9519689519,-1.3016486704,-0.1238808294  
 C,0,1.6842998321,-0.0357381387,0.3143312504  
 H,0,-0.4722587332,1.633166243,1.1751533459  
 H,0,-0.9692907335,2.0694052957,-0.441801343  
 H,0,1.085794768,1.1169463225,-1.4126213848  
 H,0,1.5809409869,2.1043298462,-0.0456220783  
 H,0,1.2498744559,-2.1625401785,0.4809205088  
 H,0,1.197862184,-1.5362064801,-1.1682820616

H,0,1.6494833709,0.0502432647,1.406094488  
H,0,2.736670009,-0.1223547442,0.0314173737  
C,0,-1.2066919594,0.0127616973,0.0274621078  
C,0,-2.6152906511,-0.0452671965,-0.0034249509  
N,0,-0.501409246,-1.1436083368,-0.0094134737  
H,0,-1.0761243655,-1.9762249402,-0.0854844975

Zero-point correction= 0.138109 (Hartree/Particle)  
Thermal correction to Energy= 0.144643  
Thermal correction to Enthalpy= 0.145587  
Thermal correction to Gibbs Free Energy= 0.106818  
Sum of electronic and zero-point Energies= -288.577245  
Sum of electronic and thermal Energies= -288.570712  
Sum of electronic and thermal Enthalpies= -288.569767  
Sum of electronic and thermal Free Energies= -288.608537

S\*\*2 before annihilation 2.0087, after 2.0000

---

### 1-azacyclohepty-2-yne (25)

---

Charge = 0 Multiplicity = 1  
Redundant internal coordinates found in file. (old form).  
C,0,1.297120596,0.8898948122,0.2659987912  
C,0,1.8208291752,-0.547370371,-0.0512367639  
C,0,-1.376495639,0.7979812873,0.242602418  
C,0,-0.0527172057,1.2932081889,-0.4008334049  
H,0,2.2742502164,-0.5763021779,-1.0493136084  
H,0,2.5982576657,-0.8326254143,0.6632741957  
H,0,1.1904342566,0.9848765267,1.3518782326  
H,0,2.062875017,1.6117017651,-0.0399794536  
H,0,-2.1982349447,1.4339688086,-0.0995210998  
H,0,-1.2973216207,0.9026776304,1.335249279  
H,0,-0.0498257065,1.015045958,-1.4605869538  
H,0,-0.1032575988,2.3866987103,-0.3716263477  
C,0,0.6069614695,-1.3646198395,0.0088130792  
C,0,-0.6036568792,-1.3665688995,-0.018117717  
N,0,-1.7213615523,-0.5992494598,-0.1268941757  
H,0,-2.5783682494,-0.9491575254,0.280487529

Zero-point correction= 0.138825 (Hartree/Particle)  
Thermal correction to Energy= 0.145440  
Thermal correction to Enthalpy= 0.146384  
Thermal correction to Gibbs Free Energy= 0.108732  
Sum of electronic and zero-point Energies= -288.637116  
Sum of electronic and thermal Energies= -288.630501  
Sum of electronic and thermal Enthalpies= -288.629557  
Sum of electronic and thermal Free Energies= -288.667209

---

### TS from singlet 24 to 25 by C shift

---

Charge = 0 Multiplicity = 1  
Redundant internal coordinates found in file. (old form).  
C,0,-0.2469644039,1.4644667703,0.2379758039  
C,0,1.0566821461,0.9557718775,-0.3841701014  
C,0,-1.3717117858,-0.8260805944,0.2849507264



C,0,-1.4939757364,0.6425018716,-0.1305244041  
 H,0,1.0226636785,0.8916594658,-1.4740359724  
 H,0,1.8773180628,1.6132237404,-0.1156985043  
 H,0,-0.1269458428,1.4932381709,1.326621343  
 H,0,-0.3912379009,2.5008836558,-0.0889897544  
 H,0,-2.2268454934,-1.4097260145,-0.0622898257  
 H,0,-1.3342397186,-0.9107694956,1.3751275853  
 H,0,-1.6614058374,0.700022194,-1.2138164177  
 H,0,-2.3766094156,1.0789468033,0.3482138936  
 C,0,2.1394061301,-0.4282007655,0.4419496366  
 C,0,1.0009661721,-0.798753164,0.0220613576  
 N,0,-0.1506818057,-1.4632868814,-0.2451052864  
 H,0,-0.2356242492,-1.7722816343,-1.20756708

Zero-point correction= 0.136619 (Hartree/Particle)  
 Thermal correction to Energy= 0.142983  
 Thermal correction to Enthalpy= 0.143927  
 Thermal correction to Gibbs Free Energy= 0.106772  
 Sum of electronic and zero-point Energies= -288.591095  
 Sum of electronic and thermal Energies= -288.584731  
 Sum of electronic and thermal Enthalpies= -288.583786  
 Sum of electronic and thermal Free Energies= -288.620942

\*\*\*\*\* 1 imaginary frequencies (negative Signs) \*\*\*\*\* -409.2975 cm<sup>-1</sup>

---

#### TS from singlet 24 to 25 by N shift

---

Charge = 0 Multiplicity = 1  
 Redundant internal coordinates found in file. (old form).  
 C,0,1.6167215333,-0.0145144208,-0.285591666  
 C,0,0.9967695902,1.3072688887,0.2320774082  
 C,0,-0.6065372753,-1.3554247294,-0.2349493671  
 C,0,0.8717292416,-1.2626311546,0.2062155651  
 H,0,1.2232787261,1.4587447902,1.2944131572  
 H,0,1.4180770819,2.1638433147,-0.3072576493  
 H,0,1.6166387923,0.0032290122,-1.3799037493  
 H,0,2.6598364945,-0.0556402303,0.0408807414  
 H,0,-1.0014787498,-2.3280748778,0.0820376732  
 H,0,-0.6748917736,-1.3233103762,-1.3264981302  
 H,0,0.9187841187,-1.3132152803,1.3023986074  
 H,0,1.3917521833,-2.1528567885,-0.164814341  
 C,0,-0.4358511717,1.2889301546,-0.0033034847  
 C,0,-1.6316989195,1.1011601027,-0.375919322  
 N,0,-1.5472904561,-0.3603634987,0.2769161323  
 H,0,-1.5886934159,-0.3188299064,1.2897344249

Zero-point correction= 0.136077 (Hartree/Particle)  
 Thermal correction to Energy= 0.142451  
 Thermal correction to Enthalpy= 0.143395  
 Thermal correction to Gibbs Free Energy= 0.106211  
 Sum of electronic and zero-point Energies= -288.572636  
 Sum of electronic and thermal Energies= -288.566261  
 Sum of electronic and thermal Enthalpies= -288.565317  
 Sum of electronic and thermal Free Energies= -288.602501

\*\*\*\*\* 1 imaginary frequencies (negative Signs) \*\*\*\*\* -494.6920 cm<sup>-1</sup>

---

**2-(1-oxacyclohexylidene)carbene (singlet 26)**

---

Charge = 0 Multiplicity = 1

Redundant internal coordinates found in file. (old form).

C,0,-0.8157336321,1.3025908077,0.2971731786  
C,0,0.5767966066,1.2057018669,-0.3467547365  
C,0,-0.9431956009,-1.2128728845,0.2310745391  
C,0,-1.6640619366,0.0880124957,-0.1046528432  
H,0,0.5100172816,1.3147888158,-1.4356781579  
H,0,1.2471026687,1.9871570804,0.0208691112  
H,0,-0.7111834009,1.3424516277,1.3868623878  
H,0,-1.3000562072,2.2322513164,-0.0157928348  
H,0,-1.4626026832,-2.0829733044,-0.170081665  
H,0,-0.8392415469,-1.3333507436,1.3163706154  
H,0,-1.8712043882,0.1187328863,-1.1800964756  
H,0,-2.629211928,0.0995995112,0.4114234836  
C,0,1.1474448067,-0.1836471243,-0.0644015697  
C,0,2.3713123439,-0.1161297521,0.4112473408  
O,0,0.3777716165,-1.272662599,-0.3592603739

|                                              |                             |
|----------------------------------------------|-----------------------------|
| Zero-point correction=                       | 0.125149 (Hartree/Particle) |
| Thermal correction to Energy=                | 0.131658                    |
| Thermal correction to Enthalpy=              | 0.132603                    |
| Thermal correction to Gibbs Free Energy=     | 0.094998                    |
| Sum of electronic and zero-point Energies=   | -308.475844                 |
| Sum of electronic and thermal Energies=      | -308.469335                 |
| Sum of electronic and thermal Enthalpies=    | -308.468391                 |
| Sum of electronic and thermal Free Energies= | -308.505996                 |

---

**2-(1-oxacyclohexylidene)carbene (triplet 26)**

---

Charge = 0 Multiplicity = 3

Redundant internal coordinates found in file. (old form).

C,0,-1.0521793684,1.1955359123,0.2955719201  
C,0,0.4252423708,1.2856771219,-0.1024858631  
C,0,-0.911386142,-1.2831914819,0.1549032574  
C,0,-1.6641598735,-0.0585397604,-0.3295688219  
H,0,0.5092344419,1.6230422154,-1.1453399054  
H,0,0.9686286319,2.0277043552,0.486720487  
H,0,-1.1443404159,1.1441489583,1.3863895133  
H,0,-1.5821820514,2.0955486576,-0.0255426294  
H,0,-1.1774035655,-2.1882304267,-0.3908571975  
H,0,-1.0852624098,-1.4582658476,1.2213025336  
H,0,-1.617894793,0.0024329788,-1.4225352234  
H,0,-2.717563585,-0.1720797071,-0.0570216302  
C,0,1.1921610391,-0.014895933,-0.020775426  
C,0,2.6031561425,-0.0603228359,-0.0055863206  
O,0,0.5363275783,-1.182285207,0.0002933063

|                                            |                             |
|--------------------------------------------|-----------------------------|
| Zero-point correction=                     | 0.124716 (Hartree/Particle) |
| Thermal correction to Energy=              | 0.131233                    |
| Thermal correction to Enthalpy=            | 0.132177                    |
| Thermal correction to Gibbs Free Energy=   | 0.093261                    |
| Sum of electronic and zero-point Energies= | -308.437714                 |

Sum of electronic and thermal Energies= -308.431197  
Sum of electronic and thermal Enthalpies= -308.430253  
Sum of electronic and thermal Free Energies= -308.469169

S\*\*2 before annihilation 2.0060, after 2.0000

---

### 1-oxacyclohepty-2-yne (27)

---

Charge = 0 Multiplicity = 1  
Redundant internal coordinates found in file. (old form).  
C,0,1.2545456314,0.9282699806,0.259666275  
C,0,1.8153080022,-0.4863836614,-0.0722178081  
C,0,-1.412998292,0.7240872111,0.2464827203  
C,0,-0.1175445049,1.2774721684,-0.3907981157  
H,0,2.2106863562,-0.5108626169,-1.0941946157  
H,0,2.6440097073,-0.7346454029,0.5962040402  
H,0,1.1549626632,1.0138414391,1.3473055303  
H,0,1.9862357969,1.684156793,-0.0475265943  
H,0,-2.2845778335,1.2635632623,-0.1247603298  
H,0,-1.3721940439,0.8005907848,1.3376700571  
H,0,-0.1100908283,1.0255875601,-1.4572816826  
H,0,-0.2324320724,2.3666035634,-0.339909851  
C,0,0.6417543903,-1.3722716054,0.0567585997  
C,0,-0.5604389365,-1.303825356,-0.0415350151  
O,0,-1.715181036,-0.6893551202,-0.0709182102

Zero-point correction= 0.126376 (Hartree/Particle)  
Thermal correction to Energy= 0.132727  
Thermal correction to Enthalpy= 0.133671  
Thermal correction to Gibbs Free Energy= 0.096541  
Sum of electronic and zero-point Energies= -308.507809  
Sum of electronic and thermal Energies= -308.501458  
Sum of electronic and thermal Enthalpies= -308.500514  
Sum of electronic and thermal Free Energies= -308.537644

---

### TS from singlet 26 to 27 by C shift

---

Charge = 0 Multiplicity = 1  
Redundant internal coordinates found in file. (old form).  
C,0,-0.1605724764,1.4668659868,0.2499047583  
C,0,1.1198173177,0.9081198312,-0.3749069834  
C,0,-1.381699053,-0.7792898132,0.2610608245  
C,0,-1.4399262465,0.6915834756,-0.11704097  
H,0,1.0695315374,0.8187139555,-1.4621768275  
H,0,1.9642650933,1.5428728132,-0.1293749924  
H,0,-0.0353430926,1.4942500413,1.3375140406  
H,0,-0.2741720553,2.5055179035,-0.0813612241  
H,0,-2.2356108366,-1.3393411293,-0.1163229418  
H,0,-1.2894683213,-0.92631451,1.3408564797  
H,0,-1.6233406724,0.7718149987,-1.1943253174  
H,0,-2.3025414853,1.1394102864,0.3870062698  
C,0,0.9060553125,-0.8835765122,0.0117309019  
C,0,2.0338738025,-0.5189302349,0.4531732302  
O,0,-0.2186748238,-1.4130520927,-0.3731112484

Zero-point correction= 0.124172 (Hartree/Particle)  
 Thermal correction to Energy= 0.130329  
 Thermal correction to Enthalpy= 0.131273  
 Thermal correction to Gibbs Free Energy= 0.094460  
 Sum of electronic and zero-point Energies= -308.463018  
 Sum of electronic and thermal Energies= -308.456862  
 Sum of electronic and thermal Enthalpies= -308.455917  
 Sum of electronic and thermal Free Energies= -308.492731

\*\*\*\*\* 1 imaginary frequencies (negative Signs) \*\*\*\*\* -430.4986 cm<sup>-1</sup>

---

### TS from singlet 26 to 27 by O shift

---

Charge = 0 Multiplicity = 1  
 Redundant internal coordinates found in file. (old form).  
 C,0,-1.5734736644,0.2113437246,-0.3002504313  
 C,0,-1.1468781566,-1.1797530036,0.2385931605  
 C,0,0.8110034193,1.2369930496,-0.207932646  
 C,0,-0.6693625158,1.3590666168,0.180780412  
 H,0,-1.4020854782,-1.3060185419,1.297099753  
 H,0,-1.663857482,-1.9790752796,-0.3076100113  
 H,0,-1.5690436848,0.1741712167,-1.3938253679  
 H,0,-2.6026219768,0.4024531308,0.0177157187  
 H,0,1.3549431396,2.1182004352,0.1459774122  
 H,0,0.9374847503,1.1608119731,-1.293487434  
 H,0,-0.730821604,1.447424263,1.2716863924  
 H,0,-1.04865571,2.3003279553,-0.232388251  
 C,0,0.2734981443,-1.3473831088,0.0194405394  
 C,0,1.4617431105,-1.1850802153,-0.4248037076  
 O,0,1.4736007087,0.138735784,0.4324114609

Zero-point correction= 0.123262 (Hartree/Particle)  
 Thermal correction to Energy= 0.129406  
 Thermal correction to Enthalpy= 0.130350  
 Thermal correction to Gibbs Free Energy= 0.093621  
 Sum of electronic and zero-point Energies= -308.439827  
 Sum of electronic and thermal Energies= -308.433683  
 Sum of electronic and thermal Enthalpies= -308.432738  
 Sum of electronic and thermal Free Energies= -308.469467

\*\*\*\*\* 1 imaginary frequencies (negative Signs) \*\*\*\*\* -468.1541 cm<sup>-1</sup>

---

### 2-(1-thiocyclohexylidene)carbene (singlet 28)

---

Charge = 0 Multiplicity = 1  
 Redundant internal coordinates found in file. (old form).  
 C,0,-1.7694379561,0.4277200646,0.2240685371  
 C,0,-0.7985958611,1.4690749695,-0.3842721009  
 C,0,-0.0294657316,-1.4908429217,0.4060893538  
 C,0,-1.4122215611,-1.0399705831,-0.0856375777  
 H,0,-0.8898442722,1.4905017519,-1.4752309418  
 H,0,-1.0366513695,2.4691084513,-0.0111362215  
 H,0,-1.7881339664,0.571472994,1.3094883006  
 H,0,-2.7805662346,0.6295403307,-0.1421003785  
 H,0,0.1572766057,-2.5364653094,0.1492351929

H,0,0.0868992792,-1.3687048127,1.4855686439  
H,0,-1.476412975,-1.2143514773,-1.1658480432  
H,0,-2.1664651295,-1.6859031361,0.3778465894  
C,0,0.5894822012,1.1197009033,0.0019273063  
C,0,1.5864860471,1.1501733737,0.8357353625  
S,0,1.305984924,-0.5106955988,-0.4073440228

Zero-point correction= 0.122510 (Hartree/Particle)  
Thermal correction to Energy= 0.129334  
Thermal correction to Enthalpy= 0.130279  
Thermal correction to Gibbs Free Energy= 0.091907  
Sum of electronic and zero-point Energies= -631.486752  
Sum of electronic and thermal Energies= -631.479928  
Sum of electronic and thermal Enthalpies= -631.478984  
Sum of electronic and thermal Free Energies= -631.517355

---

### 2-(1-thiocyclohexylidene)carbene (triplet 28)

---

Charge = 0 Multiplicity = 3  
Redundant internal coordinates found in file. (old form).  
C,0,-1.1950663302,1.3021063105,0.3431804799  
C,0,0.2442827816,1.5589095427,-0.1183045713  
C,0,-1.1905020989,-1.2267504271,0.1208098662  
C,0,-1.8190981592,0.0826935277,-0.3435837274  
H,0,0.2382657786,1.8787006752,-1.1696266607  
H,0,0.6911246987,2.3869332442,0.43916004  
H,0,-1.2178971739,1.1605353432,1.4302909891  
H,0,-1.7935284535,2.1927183781,0.1323804454  
H,0,-1.5252929668,-2.0771605853,-0.4763427942  
H,0,-1.4362644699,-1.429799118,1.1664401004  
H,0,-1.7225601416,0.178656033,-1.43066007  
H,0,-2.8908711522,0.0346617887,-0.1250759314  
C,0,1.2082922235,0.3939041391,-0.0258054551  
C,0,2.5963200311,0.518210623,-0.0076403984  
S,0,0.6621564329,-1.2561824752,0.0140426876

Zero-point correction= 0.121368 (Hartree/Particle)  
Thermal correction to Energy= 0.128407  
Thermal correction to Enthalpy= 0.129351  
Thermal correction to Gibbs Free Energy= 0.089026  
Sum of electronic and zero-point Energies= -631.427492  
Sum of electronic and thermal Energies= -631.420454  
Sum of electronic and thermal Enthalpies= -631.419510  
Sum of electronic and thermal Free Energies= -631.459835

S\*\*2 before annihilation 2.0072, after 2.0000

---

### 1-thiocyclohepty-2-yne (29)

---

Charge = 0 Multiplicity = 1  
Redundant internal coordinates found in file. (old form).  
C,0,1.763681238,0.6903511646,0.2422869733  
C,0,1.9959529863,-0.8239899285,-0.0509076135  
C,0,-0.8374255759,1.2328619098,0.290959068  
C,0,0.5251360517,1.3380244322,-0.440971706

H,0,2.4039818612,-0.954323524,-1.0600217226  
H,0,2.7261154903,-1.2373993,0.6506199011  
H,0,1.6799934002,0.8257132967,1.325427997  
H,0,2.6608822178,1.2332408164,-0.0727973813  
H,0,-1.4882455444,2.0586062656,-0.0077954104  
H,0,-0.6931684771,1.2895128602,1.372566656  
H,0,0.4240496469,0.9759009908,-1.4691258832  
H,0,0.7324162223,2.4109469006,-0.5172726181  
C,0,0.6678949334,-1.4163251351,0.050027066  
C,0,-0.5418848845,-1.3556926055,-0.0077625447  
S,0,-1.8677295661,-0.2870401438,-0.0450337816

Zero-point correction= 0.123350 (Hartree/Particle)  
Thermal correction to Energy= 0.130262  
Thermal correction to Enthalpy= 0.131206  
Thermal correction to Gibbs Free Energy= 0.092442  
Sum of electronic and zero-point Energies= -631.513818  
Sum of electronic and thermal Energies= -631.506906  
Sum of electronic and thermal Enthalpies= -631.505962  
Sum of electronic and thermal Free Energies= -631.544726

---

**TS from singlet 28 to 29 by C shift**

---

Charge = 0 Multiplicity = 1  
Redundant internal coordinates found in file. (old form).  
C,0,1.3834327722,1.0692424489,0.124601873  
C,0,1.5966577575,-0.3173546163,-0.4739908425  
C,0,-1.1991060669,0.9952844454,0.4551297747  
C,0,0.0108793003,1.7207820163,-0.1350859015  
H,0,1.2941341819,-0.4001970138,-1.5187888282  
H,0,2.6403924619,-0.6094655938,-0.4091625348  
H,0,1.5789569467,1.0177701765,1.2008576027  
H,0,2.149789451,1.7305211927,-0.2976358871  
H,0,-2.1238110484,1.5256863273,0.2186063496  
H,0,-1.1252424284,0.8837250224,1.5383454753  
H,0,-0.13743895,1.8357342811,-1.2147257978  
H,0,0.026129676,2.732489238,0.2865601323  
C,0,0.1080947719,-1.2903551572,0.1572817355  
C,0,1.1812649421,-1.7757407004,0.6191388532  
S,0,-1.4246427678,-0.695520067,-0.2679150047

Zero-point correction= 0.120845 (Hartree/Particle)  
Thermal correction to Energy= 0.127561  
Thermal correction to Enthalpy= 0.128505  
Thermal correction to Gibbs Free Energy= 0.090135  
Sum of electronic and zero-point Energies= -631.454859  
Sum of electronic and thermal Energies= -631.448143  
Sum of electronic and thermal Enthalpies= -631.447199  
Sum of electronic and thermal Free Energies= -631.485569

\*\*\*\*\* 1 imaginary frequencies (negative Signs) \*\*\*\*\* -476.4702 cm<sup>-1</sup>

---

**TS from singlet 28 to 29 by S shift**

---

Charge = 0 Multiplicity = 1

Redundant internal coordinates found in file. (old form).

C,0,1.8900214565,0.0401400227,0.2089748649  
C,0,1.2678496407,-1.2754387478,-0.3137657887  
C,0,-0.3123475676,1.4095136914,0.3950000924  
C,0,1.1088818763,1.3051669352,-0.1800482756  
H,0,1.3446671388,-1.3385125955,-1.4057784471  
H,0,1.8042098499,-2.1408286905,0.0926116351  
H,0,1.9691349621,-0.0196382851,1.2993155231  
H,0,2.9081717296,0.1159428192,-0.1839313154  
H,0,-0.731209438,2.3954131685,0.1731995108  
H,0,-0.3184357599,1.2809472656,1.4804284591  
H,0,1.0588564394,1.3901909702,-1.2714076769  
H,0,1.6747668772,2.1746439744,0.1746505588  
C,0,-0.1254762028,-1.384499015,0.0869094133  
C,0,-1.2835763299,-1.4201163528,0.5827978911  
S,0,-1.5599456724,0.2550278396,-0.314875445

|                                              |                             |
|----------------------------------------------|-----------------------------|
| Zero-point correction=                       | 0.121562 (Hartree/Particle) |
| Thermal correction to Energy=                | 0.128117                    |
| Thermal correction to Enthalpy=              | 0.129062                    |
| Thermal correction to Gibbs Free Energy=     | 0.091023                    |
| Sum of electronic and zero-point Energies=   | -631.476956                 |
| Sum of electronic and thermal Energies=      | -631.470402                 |
| Sum of electronic and thermal Enthalpies=    | -631.469457                 |
| Sum of electronic and thermal Free Energies= | -631.507496                 |

\*\*\*\*\* 1 imaginary frequencies (negative Signs) \*\*\*\*\* -320.9202 cm<sup>-1</sup>

## Summary output of (R/U)CCSD(T)/cc-pVTZ//B3LYP/6-311+G\*\*calculations

---

### 2-(1-azacyclobutylidene)carbene (singlet 12)

---

1\1\GINC-NSCC-N11\SP\RCCSD(T)-FC\CC-pVTZ\C4H5N1\DMTHAMAT\16-Dec-2018\0  
\\# rccsd=(t,t1diag)/cc-pvtz geom=connectivity\\Betalactamcarbene sing  
let\\0,1\C,0,-1.343404,0.015001,0.14058\C,0,-0.237766,1.089694,-0.0748  
95\H,0,-1.682752,-0.023736,1.179989\H,0,-2.202823,0.044003,-0.530754\H  
,0,-0.098563,1.822679,0.714897\H,0,-0.272944,1.57228,-1.050721\C,0,0.7  
2812,-0.129636,-0.059729\C,0,2.021626,-0.01837,0.123532\N,0,-0.347912,  
-1.036968,-0.20331\H,0,-0.31899,-1.896583,0.33283\\Version=ES64L-G16Re  
vA.03\State=1-A\HF=-208.7213894\MP2=-209.5331152\MP3=-209.5675915\MP4D  
=-209.5877055\MP4DQ=-209.565349\MP4SDQ=-209.5732201\CCSD=-209.5730701\  
CCSD(T)=-209.6135694\RMSD=5.120e-09\PG=C01 [X(C4H5N1)]\\@

T1 Diagnostic = 0.01511286

---

### 2-(1-azacyclobutylidene)carbene (triplet 12)

---

1\1\GINC-NSCC-N11\SP\UCCSD(T)-FC\CC-pVTZ\C4H5N1(3)\DMTHAMAT\16-Dec-201  
8\0\\# uccsd=(t,t1diag)/cc-pvtz geom=connectivity\\Betalactamcarbene t  
riplet\\0,3\C,0,-1.386202,-0.151788,0.\C,0,-0.425928,1.074386,0.\H,0,-  
2.000456,-0.276846,0.894439\H,0,-2.000456,-0.276846,-0.894439\H,0,-0.4  
63737,1.699439,0.892109\H,0,-0.463737,1.699438,-0.892109\C,0,0.724555,  
0.040517,0.\C,0,2.115197,0.042528,0.\N,0,-0.174269,-0.984695,0.\H,0,-0  
.017461,-1.986175,0.\\Version=ES64L-G16RevA.03\State=3-A\HF=-208.7182  
948\MP2=-209.5043886\MP3=-209.5408934\MP4D=-209.5589257\MP4DQ=-209.537  
9743\PUHF=-208.7226274\PMP2-0=-209.5073561\PMP3-0=-209.5426322\MP4SDQ=  
-209.5457531\CCSD=-209.545694\CCSD(T)=-209.584102\S2=2.030644\S2-1=2.0  
11153\S2A=2.00043\RMSD=7.258e-09\PG=CS [SG(C4H1N1),X(H4)]\\@

T1 Diagnostic = 0.01728975

---

### 1-azacyclopent-2-yne (13)

---

1\1\GINC-NSCC-N2\SP\RCCSD(T)-FC\CC-pVTZ\C4H5N1\DMTHAMAT\16-Dec-2018\0\  
\\# rccsd=(t,t1diag)/cc-pvtz geom=connectivity\\Azacyclopentyne singlet  
\\0,1\C,0,0.013307,1.090041,-0.188129\C,0,-1.212033,0.146463,0.239823\  
H,0,-0.079107,1.330053,-1.251782\H,0,0.103202,2.021833,0.377577\H,0,-2  
.14356,0.436046,-0.248301\H,0,-1.355649,0.170182,1.325657\C,0,-0.57467  
4,-1.119463,-0.317753\C,0,0.65579,-1.0582,0.100146\N,0,1.173815,0.1759  
23,0.028906\H,0,1.964061,0.457377,0.589981\\Version=ES64L-G16RevA.03\  
tate=1-A\HF=-208.6986845\MP2=-209.5235954\MP3=-209.5525679\MP4D=-209.5  
721829\MP4DQ=-209.5485655\MP4SDQ=-209.5602967\CCSD=-209.5637483\CCSD(T  
)=-209.6104394\RMSD=4.475e-09\PG=C01 [X(C4H5N1)]\\@

T1 Diagnostic = 0.03994815

---

### TS from singlet 12 to 13 by C shift

---

1\1\GINC-NSCC-N2\SP\RCCSD(T)-FC\CC-pVTZ\C4H5N1\DMTHAMAT\16-Dec-2018\0\  
\\# rccsd=(t,t1diag)/cc-pvtz geom=connectivity\\TS to azacyclopentyne -  
C shift\\0,1\C,0,1.050276,0.602158,-0.067013\H,0,1.655316,0.953428,0.  
768768\H,0,1.478742,0.950599,-1.006337\C,0,-1.658529,-0.378496,-0.0523



23\C,0,-0.463444,-0.790427,-0.003828\C,0,-0.480381,1.002352,0.083517\H  
,0,-0.712879,1.460284,1.040655\H,0,-0.831283,1.603547,-0.747303\N,0,0.  
914065,-0.891461,-0.078929\H,0,1.324118,-1.341156,0.734595\\Version=ES  
64L-G16RevA.03\State=1-A\HF=-208.6975103\MP2=-209.5355031\MP3=-209.559  
0878\MP4D=-209.5793348\MP4DQ=-209.5545536\MP4SDQ=-209.5625906\CCSD=-20  
9.5615427\CCSD(T)=-209.6059138\RMSE=9.650e-09\PG=C01 [X(C4H5N1)]\\@

T1 Diagnostic = 0.01311808

---

#### TS from singlet 12 to 13 by N shift

---

1\1\GINC-NSCC-N2\SP\RCCSD(T)-FC\CC-pVTZ\C4H5N1\DMTHAMAT\16-Dec-2018\0\  
\# rccsd=(t,t1diag)/cc-pvtz geom=connectivity\\TS to azacyclopentyne -  
N shift\0,1\C,0,0.797868,0.821219,-0.143157\C,0,1.119061,-0.674717,0  
.055582\H,0,1.288484,1.474133,0.577995\H,0,1.010571,1.170383,-1.153217  
\H,0,1.660559,-0.903502,0.975669\H,0,1.614154,-1.15599,-0.788553\C,0,-  
1.49611,-0.513002,-0.210233\C,0,-0.334997,-0.951917,0.133138\N,0,-0.73  
2868,0.877721,0.053841\H,0,-0.958619,1.181433,0.999239\\Version=ES64L-  
G16RevA.03\State=1-A\HF=-208.6752787\MP2=-209.5123155\MP3=-209.5365509  
\MP4D=-209.5579008\MP4DQ=-209.5328074\MP4SDQ=-209.543394\CCSD=-209.542  
6866\CCSD(T)=-209.5887943\RMSE=5.700e-09\PG=C01 [X(C4H5N1)]\\@

T1 Diagnostic = 0.02104273

---

#### 2-(1-oxacyclobutylidene)carbene (singlet 14)

---

1\1\GINC-NSCC-N2\SP\RCCSD(T)-FC\CC-pVTZ\C4H4O1\DMTHAMAT\17-Dec-2018\0\  
\# rccsd=(t,t1diag)/cc-pvtz geom=connectivity\\Betalactone carbene sin  
glet\0,1\C,0,-1.332982,-0.042939,-0.000047\C,0,-0.269611,1.082539,0.0  
00056\H,0,-1.946773,-0.119324,0.89771\H,0,-1.946713,-0.119216,-0.89785  
3\H,0,-0.235293,1.699736,0.89533\H,0,-0.235234,1.699843,-0.895141\C,0,  
0.699745,-0.114609,0.000016\C,0,2.013993,-0.020501,0.000065\O,0,-0.287  
856,-1.073497,-0.000074\\Version=ES64L-G16RevA.03\State=1-A\HF=-228.55  
09854\MP2=-229.3841222\MP3=-229.413458\MP4D=-229.4340852\MP4DQ=-229.41  
19129\MP4SDQ=-229.4212644\CCSD=-229.420647\CCSD(T)=-229.4612941\RMSE=8  
.239e-09\PG=C01 [X(C4H4O1)]\\@

T1 Diagnostic = 0.01588445

---

#### 2-(1-oxacyclobutylidene)carbene (triplet 14)

---

1\1\GINC-NSCC-N11\SP\UCCSD(T)-FC\CC-pVTZ\C4H4O1(3)\DMTHAMAT\17-Dec-201  
8\0\# uccsd=(t,t1diag)/cc-pvtz geom=connectivity\\Betalactone carbene  
triplet\0,3\C,0,-1.345507,-0.173587,0.000125\C,0,-0.432338,1.062253,  
-0.000023\H,0,-1.933009,-0.357673,0.898542\H,0,-1.933162,-0.357776,-0.  
89817\H,0,-0.467891,1.690867,0.890728\H,0,-0.468043,1.690765,-0.890841  
\C,0,0.691202,0.036198,-0.00006\C,0,2.08337,0.014458,-0.000182\O,0,-0.  
147282,-1.037764,0.000073\\Version=ES64L-G16RevA.03\State=3-A\HF=-228.  
5437085\MP2=-229.3506101\MP3=-229.3811329\MP4D=-229.4001667\MP4DQ=-229  
.3797524\PUHF=-228.5469165\PM2-0=-229.3526331\PM3-0=-229.3822476\MP4  
SDQ=-229.389621\CCSD=-229.388996\CCSD(T)=-229.4276439\S2=2.017582\S2-1  
=2.004525\S2A=2.000136\RMSE=7.950e-09\PG=C01 [X(C4H4O1)]\\@

T1 Diagnostic = 0.02036099

---

**2-(1-thiocyclobutylidene)carbene (singlet 16)**

---

1\1\GINC-NSCC-N2\SP\RCCSD(T)-FC\CC-pVTZ\C4H4S1\DMTHAMAT\17-Dec-2018\0\ \\# rccsd=(t,t1diag)/cc-pvtz geom=connectivity\\Beta thiolactone carben e singlet\\0,1\C,0,1.274233,0.675772,0.082144\C,0,-0.115561,1.337602,-0.067815\H,0,1.977873,0.88203,-0.721529\H,0,1.745059,0.841992,1.049276 \\H,0,-0.244291,1.834817,-1.029873\H,0,-0.375653,2.031366,0.731421\C,0,-0.918291,0.02843,-0.012782\C,0,-2.197671,-0.216116,0.067296\S,0,0.540047,-1.034021,-0.027647\\Version=ES64L-G16RevA.03\State=1-A\HF=-551.2369181\MP2=-552.0125845\MP3=-552.0553031\MP4D=-552.076663\MP4DQ=-552.0525421\MP4SDQ=-552.0601524\CCSD=-552.0596781\CCSD(T)=-552.1018986\RMSE=1.210e-09\PG=C01 [X(C4H4S1)]\\@

T1 Diagnostic = 0.01561639

---

**2-(1-thiocyclobutylidene)carbene (triplet 16)**

---

1\1\GINC-NSCC-N2\SP\UCCSD(T)-FC\CC-pVTZ\C4H4S1(3)\DMTHAMAT\17-Dec-2018\0\ \\# uccsd=(t,t1diag)/cc-pvtz geom=connectivity\\Beta thiolactone carbene triplet\\0,3\C,0,-1.338443,0.57332,-0.000017\C,0,-0.001286,1.347487,0.000038\H,0,-1.951143,0.693623,0.892082\H,0,-1.951099,0.693673,-0.892139\H,0,0.153871,1.972746,0.883575\H,0,0.153915,1.972796,-0.883456\C,0,0.897506,0.119115,0.000025\C,0,2.249548,-0.116506,0.000053\S,0,-0.453094,-1.054584,-0.000041\\Version=ES64L-G16RevA.03\State=3-A\HF=-551.2126042\MP2=-551.963628\MP3=-552.0084682\MP4D=-552.0278381\MP4DQ=-552.0049926\PUHF=-551.2161134\MP2-0=-551.9658542\MP3-0=-552.0097256\MP4SDQ=-552.0135874\CCSD=-552.0147656\CCSD(T)=-552.0562229\S2=2.021701\S2-1=2.005714\S2A=2.000245\RMSE=6.305e-09\PG=C01 [X(C4H4S1)]\\@

T1 Diagnostic = 0.02735355

---

**1-thiocyclopent-2-yne (17)**

---

1\1\GINC-NSCC-N11\SP\RCCSD(T)-FC\CC-pVTZ\C4H4S1\DMTHAMAT\16-Dec-2018\0\ \\# rccsd=(t,t1diag)/cc-pvtz geom=connectivity\\Thiacyclopentyne singlet\\0,1\C,0,-0.502017,-1.127988,-0.147096\C,0,-1.572507,-0.021179,0.174536\H,0,-0.56969,-2.008018,0.492981\H,0,-0.586733,-1.426326,-1.191994 \\H,0,-1.848766,-0.011929,1.23357\H,0,-2.466512,-0.161859,-0.433137\C,0,-0.714973,1.123224,-0.194361\C,0,0.495718,1.346144,-0.019238\S,0,1.202148,-0.269567,0.063471\\Version=ES64L-G16RevA.03\State=1-A\HF=-551.220899\MP2=-552.0259986\MP3=-552.0558637\MP4D=-552.0777824\MP4DQ=-552.0512278\MP4SDQ=-552.0625754\CCSD=-552.0633167\CCSD(T)=-552.1115175\RMSE=8.137e-09\PG=C01 [X(C4H4S1)]\\@

T1 Diagnostic = 0.03131390

---

**TS from singlet 16 to 17 by C shift**

---

1\1\GINC-NSCC-N11\SP\RCCSD(T)-FC\CC-pVTZ\C4H4S1\DMTHAMAT\17-Dec-2018\0\ \\# rccsd=(t,t1diag)/cc-pvtz geom=connectivity\\TS to thiacyclopentyne - C shift\\0,1\C,0,-0.238305,1.216177,-0.154523\C,0,1.206588,0.692006,0.170922\H,0,-0.568041,1.999955,0.525324\H,0,-0.321056,1.547277,-1.188242\H,0,1.467388,0.856241,1.213124\H,0,1.931333,1.148938,-0.496141\C,0,0.359677,-0.948957,-0.064079\C,0,1.618768,-1.002933,-0.111532\S,0,-1.261874,-0.330636,0.056325\\Version=ES64L-G16RevA.03\State=1-A\HF=-551

.2030422\MP2=-552.0075516\MP3=-552.0373756\MP4D=-552.0593056\MP4DQ=-552.0327928\MP4SDQ=-552.0412655\CCSD=-552.0400812\CCSD(T)=-552.0867856\RMSD=7.211e-09\PG=C01 [X(C4H4S1)]\@

T1 Diagnostic = 0.01688364

---

### TS from singlet 16 to 17 by S shift

---

1\1\GINC-NSCC-N11\SP\RCCSD(T)-FC\CC-pVTZ\C4H4S1\DMTHAMAT\17-Dec-2018\0  
\# rccsd=(t,t1diag)/cc-pvtz geom=connectivity\TS to thiacyclopentene  
- S shift\0,1C,0,1.081714,-0.732482,0.340048\C,0,1.295263,0.697336,  
-0.205571\H,0,1.650343,-1.519785,-0.151409\H,0,1.181851,-0.790742,1.42  
3052\H,0,1.671724,0.681068,-1.231267\H,0,1.922394,1.351216,0.402773\C,  
0,-0.148888,1.048298,-0.149667\C,0,-1.317717,1.256464,0.33426\S,0,-0.7  
43034,-0.833716,-0.147348\Version=ES64L-G16RevA.03\State=1-A\HF=-551.  
2200207\MP2=-552.0189696\MP3=-552.0523079\MP4D=-552.0743661\MP4DQ=-552.  
.0476248\MP4SDQ=-552.0557994\CCSD=-552.0544611\CCSD(T)=-552.1006739\RM  
SD=3.477e-09\PG=C01 [X(C4H4S1)]\@

T1 Diagnostic = 0.01502545

---

### 2-(1-azacyclopentylidene)carbene (singlet 18)

---

1\1\GINC-NSCC-N2\SP\RCCSD(T)-FC\CC-pVTZ\C5H7N1\DMTHAMAT\17-Dec-2018\0  
\# rccsd=(t,t1diag)/cc-pvtz geom=connectivity\glactamcarbene singlet\  
\0,1C,0,0.2044,1.195344,0.161591\C,0,-1.231296,0.779066,-0.231986\C,0  
,-1.304101,-0.688357,0.192852\H,0,0.600761,2.007938,-0.444797\H,0,0.24  
7917,1.492799,1.211681\H,0,-1.364493,0.859121,-1.313056\H,0,-1.98116,1  
.402045,0.258903\H,0,-1.498995,-0.772025,1.272024\H,0,-2.070327,-1.253  
851,-0.34191\C,0,0.96902,-0.138238,-0.023962\C,0,2.281767,-0.054648,-0  
.028479\N,0,0.033934,-1.173259,-0.175839\H,0,0.31002,-2.08222,0.167936  
\Version=ES64L-G16RevA.03\State=1-A\HF=-247.8069312\MP2=-248.7938586\  
MP3=-248.836815\MP4D=-248.8603836\MP4DQ=-248.8339601\MP4SDQ=-248.84285  
22\CCSD=-248.8424175\CCSD(T)=-248.8903415\RMSD=7.786e-09\PG=C01 [X(C5H  
7N1)]\@

T1 Diagnostic = 0.01389395

---

### 2-(1-azacyclopentylidene)carbene (triplet 18)

---

1\1\GINC-NSCC-N14\SP\UCCSD(T)-FC\CC-pVTZ\C5H7N1(3)\DMTHAMAT\17-Dec-201  
8\0\# uccsd=(t,t1diag)/cc-pvtz geom=connectivity\glactamcarbene trip  
let\0,3C,0,0.045027,1.225097,0.150614\C,0,-1.353895,0.672782,-0.1984  
66\C,0,-1.248776,-0.833629,0.113778\H,0,0.362309,2.05165,-0.484925\H,0  
,-0.098521,1.575327,1.18764\H,0,-1.553494,0.811625,-1.263735\H,0,-2.159  
652,1.151535,0.359136\H,0,-1.566108,-1.066034,1.137759\H,0,-1.823335,-  
1.461057,-0.570974\C,0,0.972026,0.025016,-0.000642\C,0,2.374473,-0.009  
124,-0.076719\N,0,0.186676,-1.077713,-0.033684\H,0,0.601892,-1.9999,-0  
.060512\Version=ES64L-G16RevA.03\State=3-A\HF=-247.8043984\MP2=-248.7  
644365\MP3=-248.8102782\MP4D=-248.8317489\MP4DQ=-248.806698\PUHF=-247.  
8086284\MP2=0=-248.7673308\MP3=0=-248.8119781\MP4SDQ=-248.815376\CCS  
D=-248.8150408\CCSD(T)=-248.8606881\S2=2.029776\S2-1=2.010804\S2A=2.00  
0399\RMSD=4.123e-09\PG=C01 [X(C5H7N1)]\@

T1 Diagnostic = 0.01531540

---

**1-azacyclohex-2-yne (19)**

---

1\1\GINC-NSCC-N15\SP\RCCSD(T)-FC\CC-pVTZ\C5H7N1\DMTHAMAT\17-Dec-2018\0  
\\# rccsd=(t,t1diag)/cc-pvtz geom=connectivity\\Azacyclohexyne\\0,1\C,  
0,1.580058,-0.170935,0.156117\C,0,0.676586,1.053652,-0.273213\C,0,-0.7  
79149,1.016744,0.23834\H,0,2.468169,-0.212775,-0.479721\H,0,1.919726,-  
0.07722,1.1922\H,0,0.665101,1.098587,-1.365342\H,0,1.135834,1.979992,0  
.089496\H,0,-0.780592,1.094042,1.333545\H,0,-1.326897,1.870458,-0.1688  
93\C,0,0.615421,-1.277972,-0.028928\C,0,-0.604451,-1.249022,-0.022979\  
N,0,-1.515466,-0.235325,-0.186544\H,0,-2.40386,-0.340616,0.288502\\Ver  
sion=ES64L-G16RevA.03\State=1-A\HF=-247.788367\MP2=-248.8210163\MP3=-  
248.8460601\MP4D=-248.8722314\MP4DQ=-248.8415963\MP4SDQ=-248.8521721\C  
CSD=-248.8514561\CCSD(T)=-248.9056636\RMSE=5.201e-09\PG=C01 [X(C5H7N1)]\\@

T1 Diagnostic = 0.01623650

---

**TS from singlet 18 to 19 by C shift**

---

1\1\GINC-NSCC-N16\SP\RCCSD(T)-FC\CC-pVTZ\C5H7N1\DMTHAMAT\17-Dec-2018\0  
\\# rccsd=(t,t1diag)/cc-pvtz geom=connectivity\\TS to azacyclohexyne -  
C shift\\0,1\C,0,0.737979,0.957792,0.416058\C,0,-0.646201,1.160078,-0  
.213854\C,0,-1.465911,-0.147469,-0.098431\H,0,1.431537,1.735062,0.1137  
62\H,0,0.727516,0.890648,1.504596\H,0,-0.512312,1.424842,-1.264627\H,0  
,-1.165327,1.992311,0.272319\H,0,-2.144747,-0.132552,0.757383\H,0,-2.0  
59545,-0.321852,-0.997857\C,0,0.765601,-0.789387,-0.060111\C,0,1.90794  
3,-0.341991,-0.379353\N,0,-0.491281,-1.263379,0.096026\H,0,-0.634624,-  
1.778942,0.956387\\Version=ES64L-G16RevA.03\State=1-A\HF=-247.7761267\  
MP2=-248.7901068\MP3=-248.8221714\MP4D=-248.846271\MP4DQ=-248.8171309\  
MP4SDQ=-248.826115\CCSD=-248.8247461\CCSD(T)=-248.8769008\RMSE=5.477e-  
09\PG=C01 [X(C5H7N1)]\\@

T1 Diagnostic = 0.01181049

---

**TS from singlet 18 to 19 by N shift**

---

1\1\GINC-NSCC-N2\SP\RCCSD(T)-FC\CC-pVTZ\C5H7N1\DMTHAMAT\18-Dec-2018\0\  
\\# rccsd=(t,t1diag)/cc-pvtz geom=connectivity\\TS to azacyclohexyne -  
N shift\\0,1\C,0,-0.155928,1.238032,-0.312836\C,0,-1.359253,0.407366,0  
.148528\H,0,-0.065966,1.213999,-1.402152\H,0,-0.258398,2.285364,-0.009  
833\H,0,-1.551275,0.595446,1.208914\H,0,-2.275043,0.640315,-0.403149\C  
,0,0.473931,-1.084571,0.038405\C,0,1.670675,-0.722434,-0.196563\N,0,1.  
1195,0.753654,0.236881\H,0,1.165125,0.843553,1.247601\C,0,-0.978441,-1  
.113372,-0.021735\H,0,-1.311547,-1.487577,-0.994731\H,0,-1.4453,-1.716  
803,0.760396\\Version=ES64L-G16RevA.03\State=1-A\HF=-247.7519843\MP2=-  
248.7663994\MP3=-248.7984755\MP4D=-248.8234061\MP4DQ=-248.7938727\MP4S  
DQ=-248.8053005\CCSD=-248.8041825\CCSD(T)=-248.8577619\RMSE=6.730e-09\  
PG=C01 [X(C5H7N1)]\\@

T1 Diagnostic = 0.01822496

---

**2-(1-oxacyclopentylidene)carbene (singlet 20)**

---

1\1\GINC-NSCC-N17\SP\RCCSD(T)-FC\CC-pVTZ\C5H6O1\DMTHAMAT\17-Dec-2018\0  
\\# rccsd=(t,t1diag)/cc-pvtz geom=connectivity\glactonecarbene single  
t\0,1\C,0,0.20873,1.168605,0.241114\C,0,-1.189809,0.782153,-0.284006\  
C,0,-1.291817,-0.686687,0.11579\H,0,0.657261,2.011134,-0.282346\H,0,0.  
180302,1.394279,1.310766\H,0,-1.229901,0.887535,-1.37039\H,0,-1.977752  
,1.395638,0.15736\H,0,-1.618221,-0.810566,1.153386\H,0,-1.924514,-1.28  
938,-0.535501\O,0,0.060129,-1.206185,-0.003256\C,0,0.936563,-0.163299,  
0.015253\C,0,2.241632,-0.090632,-0.156021\\Version=ES64L-G16RevA.03\St  
ate=1-A\HF=-267.6362096\MP2=-268.6441399\MP3=-268.6819997\MP4D=-268.70  
5934\MP4DQ=-268.679683\MP4SDQ=-268.6899217\CCSD=-268.6890633\CCSD(T)=-  
268.7371711\RMSD=5.596e-09\PG=C01 [X(C5H6O1)]\\@

T1 Diagnostic = 0.01431870

---

**2-(1-oxacyclopentylidene)carbene (triplet 20)**

---

1\1\GINC-NSCC-N11\SP\UCCSD(T)-FC\CC-pVTZ\C5H6O1(3)\DMTHAMAT\17-Dec-201  
8\0\\# uccsd=(t,t1diag)/cc-pvtz geom=connectivity\glactonecarbene tri  
plet\0,3\C,0,0.043658,1.204342,0.164642\C,0,-1.343689,0.660443,-0.215  
848\C,0,-1.209724,-0.825666,0.11959\H,0,0.386534,2.039961,-0.44531\H,0  
,0.084074,1.530908,1.211188\H,0,-1.524422,0.79355,-1.284988\H,0,-2.161  
266,1.132953,0.329935\H,0,-1.468319,-1.053522,1.157327\H,0,-1.749319,-  
1.500969,-0.542505\O,0,0.2112,-1.119969,-0.038073\C,0,0.94828,0.001268  
,0.002898\C,0,2.351995,-0.037575,-0.09146\\Version=ES64L-G16RevA.03\St  
ate=3-A\HF=-267.624864\MP2=-268.6039126\MP3=-268.6444239\MP4D=-268.666  
6204\MP4DQ=-268.6421805\PUHF=-267.6280305\MP2-0=-268.605907\MP3-0=-2  
68.6455256\MP4SDQ=-268.6526278\CCSD=-268.6517545\CCSD(T)=-268.6974321\  
S2=2.017281\S2-1=2.004428\S2A=2.000122\RMSD=5.331e-09\PG=C01 [X(C5H6O1  
)\\@

T1 Diagnostic = 0.01716699

---

**1-oxacyclohex-2-yne (21)**

---

1\1\GINC-NSCC-N12\SP\RCCSD(T)-FC\CC-pVTZ\C5H6O1\DMTHAMAT\17-Dec-2018\0  
\\# rccsd=(t,t1diag)/cc-pvtz geom=connectivity\oxacyclohexyne\0,1\C,  
0,1.562535,-0.068986,0.073561\C,0,0.567091,1.101713,-0.261643\C,0,-0.8  
58798,0.932596,0.29684\H,0,2.335027,-0.124979,-0.697063\H,0,2.075094,0.  
.08701,1.027065\H,0,0.500782,1.211623,-1.347729\H,0,0.952709,2.046831,  
0.137834\H,0,-0.865227,0.898822,1.388813\H,0,-1.528147,1.712854,-0.062  
528\O,0,-1.507883,-0.344415,-0.163117\C,0,0.676547,-1.281327,0.142237\  
C,0,-0.515238,-1.196801,-0.107905\\Version=ES64L-G16RevA.03\State=1-A\  
HF=-267.6104986\MP2=-268.6651423\MP3=-268.6842269\MP4D=-268.7107043\MP  
4DQ=-268.6802411\MP4SDQ=-268.6926509\CCSD=-268.6914683\CCSD(T)=-268.74  
63496\RMSD=6.884e-09\PG=C01 [X(C5H6O1)]\\@

T1 Diagnostic = 0.01795460

---

**TS from singlet 20 to 21 by C shift**

---

1\1\GINC-NSCC-N13\SP\RCCSD(T)-FC\CC-pVTZ\C5H6O1\DMTHAMAT\17-Dec-2018\0  
\\# rccsd=(t,t1diag)/cc-pvtz geom=connectivity\\TS to oxacyclohexyne -  
C shift\0,1\C,0,0.739143,1.084128,0.053499\C,0,-0.788227,1.073613,-0  
.208302\C,0,-1.375583,-0.236407,0.303065\H,0,1.255051,1.661318,-0.7061  
9\H,0,0.96815,1.459998,1.045763\H,0,-0.982061,1.151978,-1.280159\H,0,-  
1.247248,1.935028,0.285218\H,0,-1.365603,-0.304823,1.394585\H,0,-2.365  
99,-0.474787,-0.079681\O,0,-0.466031,-1.252557,-0.231326\C,0,0.743339,  
-0.777006,-0.073899\C,0,1.925653,-0.379039,0.124149\\Version=ES64L-G16  
RevA.03\State=1-A\HF=-267.6017502\MP2=-268.6382461\MP3=-268.6638764\MP  
4D=-268.6883411\MP4DQ=-268.6592591\MP4SDQ=-268.6699417\CCSD=-268.66802  
53\CCSD(T)=-268.7207067\RMSD=3.295e-09\PG=C01 [X(C5H6O1)]\\@

T1 Diagnostic = 0.01308362

---

**TS from singlet 20 to 21 by O shift**

---

1\1\GINC-NSCC-N2\SP\RCCSD(T)-FC\CC-pVTZ\C5H6O1\DMTHAMAT\18-Dec-2018\0  
\\# rccsd=(t,t1diag)/cc-pvtz geom=connectivity\\TS to oxacyclohexyne -  
O shift\0,1\C,0,-1.081121,-1.016411,0.00308\C,0,-1.276397,0.558333,-0  
.075936\C,0,0.043906,1.23655,0.280126\H,0,-1.431489,-1.392196,0.969706  
\H,0,-1.636127,-1.51502,-0.793692\H,0,-2.092876,0.867593,0.581688\H,0,  
-1.547508,0.806488,-1.103677\H,0,0.066258,2.27381,-0.064927\H,0,0.2399  
88,1.210736,1.357218\O,0,1.112868,0.58724,-0.425022\C,0,0.358877,-1.15  
2118,-0.080821\C,0,1.53787,-0.784576,0.282527\\Version=ES64L-G16RevA.0  
3\State=1-A\HF=-267.5674117\MP2=-268.6011544\MP3=-268.6284907\MP4D=-26  
8.6545315\MP4DQ=-268.6251949\MP4SDQ=-268.6394257\CCSD=-268.6370968\CCS  
D(T)=-268.6913092\RMSD=5.220e-09\PG=C01 [X(C5H6O1)]\\@

T1 Diagnostic = 0.02045211

---

**2-(1-thiocyclopentylidene)carbene (singlet 22)**

---

1\1\GINC-NSCC-N11\SP\RCCSD(T)-FC\CC-pVTZ\C5H6S1\DMTHAMAT\18-Dec-2018\0  
\\# rccsd=(t,t1diag)/cc-pvtz geom=connectivity\\gthiolactonecarbene si  
nglet\0,1\C,0,0.279663,1.388223,0.306835\C,0,-1.097512,1.144241,-0.32  
7976\C,0,-1.537196,-0.257215,0.091951\H,0,0.781688,2.266961,-0.09973\H  
,0,0.190741,1.513472,1.390478\H,0,-1.016404,1.200201,-1.416279\H,0,-1.  
818762,1.899536,-0.000757\H,0,-1.918046,-0.274076,1.114291\H,0,-2.2838  
93,-0.687436,-0.575405\C,0,1.063154,0.098951,0.02963\C,0,2.347015,0.16  
8165,-0.200077\S,0,-0.016629,-1.323303,0.011576\\Version=ES64L-G16RevA  
.03\State=1-A\HF=-590.3152526\MP2=-591.2688007\MP3=-591.318669\MP4D=-5  
91.3436107\MP4DQ=-591.3152643\MP4SDQ=-591.323937\CCSD=-591.3230511\CCS  
D(T)=-591.3730953\RMSD=7.874e-09\PG=C01 [X(C5H6S1)]\\@

T1 Diagnostic = 0.01399882

---

**2-(1-thiocyclopentylidene)carbene (triplet 22)**

---

1\1\GINC-NSCC-N12\SP\UCCSD(T)-FC\CC-pVTZ\C5H6S1(3)\DMTHAMAT\18-Dec-2018\0\#\uccsd=(t,t1diag)/cc-pvtz geom=connectivity\gthiolactonecarbene triplet\0,3\C,0,0.032576,1.431182,0.201616\C,0,-1.337113,0.943043,-0.287294\C,0,-1.484619,-0.515669,0.161998\H,0,0.3866,2.31639,-0.32928\H,0,-0.001669,1.690326,1.268349\H,0,-1.373793,0.991331,-1.379315\H,0,-2.15675,1.553413,0.10071\H,0,-1.762771,-0.599433,1.215275\H,0,-2.191878,-1.090009,-0.436087\C,0,1.027842,0.293706,0.026203\C,0,2.412047,0.362026,-0.09146\S,0,0.199742,-1.246735,-0.031626\\Version=ES64L-G16RevA.0 3\State=3-A\HF=-590.2882822\MP2=-591.2148959\MP3=-591.2681295\MP4D=-591.2910146\MP4DQ=-591.2640849\PUHF=-590.2918981\PMP2-0=-591.2171871\PMP3-0=-591.2694046\MP4SDQ=-591.2734169\CCSD=-591.2738618\CCSD(T)=-591.322483\S2=2.022321\S2-1=2.005848\S2A=2.000243\RMSD=6.376e-09\PG=C01 [X(C5H6S1)]\@

T1 Diagnostic = 0.02215782

---

**1-thiocyclohex-2-yne (23)**

---

1\1\GINC-NSCC-N13\SP\RCCSD(T)-FC\CC-pVTZ\C5H6S1\DMTHAMAT\18-Dec-2018\0\#\rccsd=(t,t1diag)/cc-pvtz geom=connectivity\thiocyclohexyne\0,1\C,0,1.855166,-0.371656,0.082828\C,0,1.135271,0.975635,-0.326434\C,0,-0.232281,1.232663,0.326952\H,0,2.617098,-0.607676,-0.664775\H,0,2.3574,-0.283064,1.050847\H,0,1.022047,0.985699,-1.413107\H,0,1.798,1.804445,-0.054159\H,0,-0.146211,1.260312,1.415362\H,0,-0.636593,2.187728,-0.016626\C,0,0.733687,-1.303649,0.118944\C,0,-0.476955,-1.354778,-0.025667\S,0,-1.568817,-0.026046,-0.08608\\Version=ES64L-G16RevA.03\State=1-A\HF=-590.3145895\MP2=-591.3071696\MP3=-591.3405571\MP4D=-591.3673101\MP4DQ=-591.3357225\MP4SDQ=-591.3459846\CCSD=-591.3446673\CCSD(T)=-591.3996455\RMSD=3.688e-09\PG=C01 [X(C5H6S1)]\@

T1 Diagnostic = 0.01599080

---

**TS from singlet 22 to 23 by C shift**

---

1\1\GINC-NSCC-N14\SP\RCCSD(T)-FC\CC-pVTZ\C5H6S1\DMTHAMAT\18-Dec-2018\0\#\rccsd=(t,t1diag)/cc-pvtz geom=connectivity\TS to thiocyclohexyne - C shift\0,1\C,0,1.555113,0.407518,-0.02305\C,0,0.425133,1.422229,-0.297628\C,0,-0.872877,1.083305,0.428547\H,0,2.295178,0.44553,-0.816004\H,0,2.015249,0.593332,0.942758\H,0,0.225983,1.473146,-1.370191\H,0,0.790115,2.407266,0.017842\H,0,-0.755358,1.072751,1.513209\H,0,-1.701766,1.737747,0.157324\C,0,0.345555,-1.079808,0.005542\C,0,1.538565,-1.442225,0.20085\S,0,-1.301146,-0.629743,-0.145657\\Version=ES64L-G16RevA.0 3\State=1-A\HF=-590.2749995\MP2=-591.2555264\MP3=-591.2936248\MP4D=-591.13193875\MP4DQ=-591.2883123\MP4SDQ=-591.2974993\CCSD=-591.2959058\CCSD(T)=-591.3504395\RMSD=4.940e-09\PG=C01 [X(C5H6S1)]\@

T1 Diagnostic = 0.01397042

---

**TS from singlet 22 to 23 by S shift**

---

1\1\GINC-NSCC-N15\SP\RCCSD(T)-FC\CC-pVTZ\C5H6S1\DMTHAMAT\18-Dec-2018\0  
\\# rccsd=(t,t1diag)/cc-pvtz geom=connectivity\\TS to thiocyclohexyne  
- S shift\\0,1\C,0,-1.40838446,-0.8069775,-0.39080484\C,0,-1.49223073,  
0.57160674,0.32731008\C,0,-0.22532306,1.39945401,0.07188385\H,0,-2.171  
2838,-1.49429418,-0.01253094\H,0,-1.54567317,-0.71470903,-1.47259622\H  
,0,-1.59448144,0.38314895,1.39736526\H,0,-2.37813438,1.1233123,-0.0015  
4521\H,0,-0.30733969,1.98055966,-0.84814801\H,0,-0.03267735,2.07933114  
,0.90157957\C,0,-0.07947153,-1.29143832,-0.06303666\C,0,1.00934252,-1.  
38250377,0.57855584\S,0,1.32537459,0.35636276,-0.19422338\\Version=ES6  
4L-G16RevA.03\State=1-A\HF=-590.290542\MP2=-591.270049\MP3=-591.309393  
8\MP4D=-591.3347702\MP4DQ=-591.3035279\MP4SDQ=-591.3137755\CCSD=-591.3  
124824\CCSD(T)=-591.3671191\RMSD=4.350e-09\PG=C01 [X(C5H6S1)]\\@

T1 Diagnostic = 0.01738642

---

**2-(1-azacyclohexylidene)carbene (singlet 24)**

---

1\1\GINC-NSCC-N11\SP\RCCSD(T)-FC\CC-pVTZ\C6H9N1\DMTHAMAT\18-Dec-2018\0  
\\# rccsd=(t,t1diag)/cc-pvtz geom=connectivity\\delta lactamcarbene si  
nglet\\0,1\C,0,1.386189,0.762943,-0.324839\C,0,0.175223,1.515189,0.285  
543\C,0,0.143944,-1.474232,-0.192023\C,0,1.446591,-0.715233,0.113989\H  
,0,0.348069,1.695993,1.354259\H,0,0.036988,2.486822,-0.194014\H,0,1.30  
6902,0.810254,-1.416149\H,0,2.315915,1.268149,-0.04746\H,0,0.167473,-2  
.489845,0.211587\H,0,-0.022207,-1.542856,-1.271325\H,0,1.642946,-0.769  
358,1.192258\H,0,2.284007,-1.215079,-0.383195\C,0,-1.02163,0.663841,0.  
093414\C,0,-2.091772,0.264263,-0.550174\N,0,-0.999998,-0.756068,0.3852  
41\H,0,-1.311382,-1.05223,1.301886\\Version=ES64L-G16RevA.03\State=1-A  
\HF=-286.8502414\MP2=-288.0366921\MP3=-288.0804117\MP4D=-288.1084276\W  
P4DQ=-288.0759149\MP4SDQ=-288.0863077\CCSD=-288.0845306\CCSD(T)=-288.1  
432209\RMSD=8.917e-09\PG=C01 [X(C6H9N1)]\\@

T1 Diagnostic = 0.01208762

---

**2-(1-azacyclohexylidene)carbene (triplet 24)**

---

1\1\GINC-NSCC-N13\SP\UCCSD(T)-FC\CC-pVTZ\C6H9N1(3)\DMTHAMAT\18-Dec-201  
8\0\\# uccsd=(t,t1diag)/cc-pvtz geom=connectivity\\delta lactamcarbene  
triplet\\0,3\C,0,1.035348,1.197627,-0.320291\C,0,-0.428323,1.310263,0  
.12683\C,0,0.951899,-1.301688,-0.123882\C,0,1.684293,-0.035814,0.31433  
\H,0,-0.472183,1.633198,1.175152\H,0,-0.969193,2.069462,-0.441802\H,0,  
1.085845,1.116901,-1.412622\H,0,1.58104,2.10426,-0.045623\H,0,1.249762  
, -2.162594,0.48092\H,0,1.197781,-1.536258,-1.168283\H,0,1.649481,0.050  
17,1.406094\H,0,2.736659,-0.122482,0.031416\C,0,-1.206696,0.01283,0.02  
7461\C,0,-2.615298,-0.045129,-0.003426\N,0,-0.501471,-1.143575,-0.0094  
14\H,0,-1.076228,-1.976163,-0.085485\\Version=ES64L-G16RevA.03\State=3  
-A\HF=-286.8538023\MP2=-287.9902034\MP3=-288.0455885\MP4D=-288.0707685  
\MP4DQ=-288.0413448\PUHF=-286.8581639\MP2-0=-287.993211\MP3-0=-288.0  
47365\MP4SDQ=-288.0512568\CCSD=-288.0507362\CCSD(T)=-288.1042513\S2=2.  
03137\S2-1=2.011714\S2A=2.000435\RMSD=4.612e-09\PG=C01 [X(C6H9N1)]\\@

T1 Diagnostic = 0.01471102



---

**1-azacyclohepty-2-yne (25)**

---

1\1\GINC-NSCC-N11\SP\RCCSD(T)-FC\CC-pVTZ\C6H9N1\DMTHAMAT\18-Dec-2018\0  
\\# rccsd=(t,t1diag)/cc-pvtz geom=connectivity\\azacycloheptyne\\0,1\C  
,0,1.29702,0.89005,0.265903\C,0,1.820843,-0.547173,-0.051332\C,0,-1.37  
6589,0.797924,0.242507\C,0,-0.05285,1.293256,-0.400929\H,0,2.274267,-0  
.576069,-1.049409\H,0,2.598295,-0.832366,0.663179\H,0,1.190326,0.98502  
4,1.351783\H,0,2.062717,1.611918,-0.040075\H,0,-2.198379,1.433846,-0.0  
99617\H,0,-1.297423,0.902626,1.335154\H,0,-0.049936,1.015094,-1.460682  
\H,0,-0.103477,2.386743,-0.371722\C,0,0.607041,-1.364519,0.008718\C,0,  
-0.603577,-1.366565,-0.018213\N,0,-1.721343,-0.599335,-0.12699\H,0,-2.  
578322,-0.949311,0.280392\\Version=ES64L-G16RevA.03\State=1-A\HF=-286.  
8724157\MP2=-288.0737046\MP3=-288.1100456\MP4D=-288.1386848\MP4DQ=-288  
.1051164\MP4SDQ=-288.1157861\CCSD=-288.1143694\CCSD(T)=-288.1741402\RM  
SD=3.576e-09\PG=C01 [X(C6H9N1)]\\@

T1 Diagnostic = 0.01173363

---

**TS from singlet 24 to 25 by C shift**

---

1\1\GINC-NSCC-N14\SP\RCCSD(T)-FC\CC-pVTZ\C6H9N1\DMTHAMAT\18-Dec-2018\0  
\\# rccsd=(t,t1diag)/cc-pvtz geom=connectivity\\TS to Azacycloheptyne  
- C shift\\0,1\C,0,0.247146,1.464417,-0.237918\C,0,-1.056425,0.955953,  
0.384575\C,0,1.371456,-0.826339,-0.285236\C,0,1.494106,0.642215,0.1302  
29\H,0,-1.022121,0.891817,1.474431\H,0,-1.877012,1.613562,0.116338\H,0  
,0.126837,1.493228,-1.32653\H,0,0.391701,2.500801,0.089025\H,0,2.22657  
6,-1.410148,0.061762\H,0,1.333671,-0.911003,-1.375404\H,0,1.661842,0.6  
99686,1.213477\H,0,2.37669,1.078504,-0.348742\C,0,-2.13963,-0.427805,-  
0.441272\C,0,-1.001145,-0.798575,-0.0217\N,0,0.150453,-1.463327,0.2451  
42\H,0,0.2356,-1.772353,1.207576\\Version=ES64L-G16RevA.03\State=1-A\H  
F=-286.8323844\MP2=-288.0208816\MP3=-288.0628557\MP4D=-288.090696\MP4D  
Q=-288.0574422\MP4SDQ=-288.0676021\CCSD=-288.0659597\CCSD(T)=-288.1257  
135\RMSD=6.563e-09\PG=C01 [X(C6H9N1)]\\@

T1 Diagnostic = 0.01153346

---

**TS from singlet 24 to 25 by N shift**

---

1\1\GINC-NSCC-N15\SP\RCCSD(T)-FC\CC-pVTZ\C6H9N1\DMTHAMAT\18-Dec-2018\0  
\\# rccsd=(t,t1diag)/cc-pvtz geom=connectivity\\TS to azacycloheptyne  
- N shift\\0,1\C,0,-1.616743,0.014073,-0.285603\C,0,-0.996429,-1.30754  
1,0.232066\C,0,0.606148,1.355593,-0.23496\C,0,-0.872093,1.262394,0.206  
204\H,0,-1.222897,-1.459079,1.294402\H,0,-1.417502,-2.164231,-0.307269  
\H,0,-1.616656,-0.003671,-1.379915\H,0,-2.65987,0.054912,0.04087\H,0,1  
.000822,2.328351,0.082027\H,0,0.674511,1.323497,-1.326509\H,0,-0.91916  
2,1.312965,1.302387\H,0,-1.39236,2.152477,-0.164825\C,0,0.436187,-1.28  
8809,-0.003315\C,0,1.631983,-1.100711,-0.37593\N,0,1.547174,0.360789,0  
.276905\H,0,1.588588,0.319267,1.289723\\Version=ES64L-G16RevA.03\State  
=1-A\HF=-286.8050951\MP2=-287.9945113\MP3=-288.0361022\MP4D=-288.06466  
82\MP4DQ=-288.0310456\MP4SDQ=-288.0440291\CCSD=-288.042775\CCSD(T)=-28  
8.1040225\RMSD=4.229e-09\PG=C01 [X(C6H9N1)]\\@

T1 Diagnostic = 0.01841911

---

**2-(1-oxacyclohexylidene)carbene (singlet 26)**

---

1\1\GINC-NSCC-N11\SP\RCCSD(T)-FC\CC-pVTZ\C6H8O1\DMTHAMAT\18-Dec-2018\0  
\\# rccsd=(t,t1diag)/cc-pvtz geom=connectivity\\delta lactonecarbene s  
inglet\\0,1\C,0,-0.816076,1.302404,0.297136\C,0,0.576478,1.205857,-0.3  
46791\C,0,-0.94292,-1.213091,0.231038\C,0,-1.664106,0.087618,-0.10469\  
H,0,0.509672,1.314928,-1.435715\H,0,1.246592,1.987477,0.020832\H,0,-0.  
711535,1.342291,1.386826\H,0,-1.300627,2.231946,-0.01583\H,0,-1.462114  
,-2.083319,-0.170118\H,0,-0.838937,-1.333543,1.316334\H,0,-1.871256,0.  
118287,-1.180133\H,0,-2.629259,0.098968,0.411387\C,0,1.147467,-0.18335  
2,-0.064438\C,0,2.371318,-0.115534,0.411211\O,0,0.378062,-1.272556,-0.  
359297\\Version=ES64L-G16RevA.03\State=1-A\HF=-306.6881395\MP2=-307.87  
15373\MP3=-307.9189167\MP4D=-307.946481\MP4DQ=-307.9160397\MP4SDQ=-307  
.9272522\CCSD=-307.9262086\CCSD(T)=-307.9819391\RMSD=7.916e-09\PG=C01  
[X(C6H8O1)]\\@

T1 Diagnostic = 0.01356764

---

**2-(1-oxacyclohexylidene)carbene (triplet 26)**

---

1\1\GINC-NSCC-N2\SP\UCCSD(T)-FC\CC-pVTZ\C6H8O1(3)\DMTHAMAT\18-Dec-2018  
\\0\\# uccsd=(t,t1diag)/cc-pvtz geom=connectivity\\delta lactonecarbene  
triplet\\0,3\C,0,-1.052157,1.195539,0.295422\C,0,0.425268,1.285633,-0  
.102636\C,0,-0.911444,-1.283193,0.154753\C,0,-1.664178,-0.058516,-0.32  
9719\H,0,0.509271,1.622995,-1.14549\H,0,0.968678,2.027642,0.48657\H,0,  
-1.144319,1.144155,1.386239\H,0,-1.58213,2.095569,-0.025693\H,0,-1.177  
491,-2.188223,-0.391007\H,0,-1.085326,-1.458261,1.221152\H,0,-1.617911  
,0.002455,-1.422686\H,0,-2.717585,-0.172022,-0.057172\C,0,1.192144,-0.  
014965,-0.020926\C,0,2.603138,-0.060438,-0.005737\O,0,0.536273,-1.1823  
33,0.000143\\Version=ES64L-G16RevA.03\State=3-A\HF=-306.6685271\MP2=-3  
07.8226128\MP3=-307.8729733\MP4D=-307.8988051\MP4DQ=-307.8701031\PUHF=  
-306.6717125\PMP2-0=-307.8246293\PMP3-0=-307.874095\MP4SDQ=-307.881692  
9\CCSD=-307.8806563\CCSD(T)=-307.9340488\S2=2.017552\S2-1=2.004609\S2A  
=2.000124\RMSD=9.825e-09\PG=C01 [X(C6H8O1)]\\@

T1 Diagnostic = 0.01634918

---

**1-oxacyclohepty-2-yne (27)**

---

1\1\GINC-NSCC-N12\SP\RCCSD(T)-FC\CC-pVTZ\C6H8O1\DMTHAMAT\18-Dec-2018\0  
\\# rccsd=(t,t1diag)/cc-pvtz geom=connectivity\\oxacycloheptyne\\0,1\C  
,0,1.254706,0.928118,0.25966\C,0,1.815256,-0.48662,-0.072224\C,0,-1.41  
2868,0.724337,0.246477\C,0,-0.117331,1.277527,-0.390804\H,0,2.21063,-0  
.511159,-1.0942\H,0,2.64392,-0.735007,0.596198\H,0,1.155136,1.013704,1  
.3473\H,0,1.98651,1.683894,-0.047532\H,0,-2.284366,1.263944,-0.124766\  
H,0,-1.372052,0.800834,1.337664\H,0,-0.109915,1.025641,-1.457287\H,0,-  
0.232055,2.366675,-0.339916\C,0,0.641569,-1.372331,0.056753\C,0,-0.560  
614,-1.303704,-0.041541\O,0,-1.715264,-0.68906,-0.070924\\Version=ES64  
L-G16RevA.03\State=1-A\HF=-306.6967009\MP2=-307.9199194\MP3=-307.95063  
14\MP4D=-307.9795323\MP4DQ=-307.9461456\MP4SDQ=-307.9582471\CCSD=-307.  
9563858\CCSD(T)=-308.0165099\RMSD=4.760e-09\PG=C01 [X(C6H8O1)]\\@

T1 Diagnostic = 0.01240841

---

**TS from singlet 26 to 27 by C shift**

---

1\1\GINC-NSCC-N14\SP\RCCSD(T)-FC\CC-pVTZ\C6H8O1\DMTHAMAT\18-Dec-2018\0  
\\# rccsd=(t,t1diag)/cc-pvtz geom=connectivity\\TS to Oxacycloheptyne  
- C shift\\0,1\C,0,-0.161019,1.466679,0.249315\C,0,1.119092,0.908404,-  
0.37649\C,0,-1.380751,-0.780221,0.262822\C,0,-1.44026,0.690425,-0.1159  
65\H,0,1.067779,0.818418,-1.463664\H,0,1.963393,1.5438,-0.13212\H,0,-0  
.034723,1.49469,1.336785\H,0,-0.275587,2.505093,-0.082362\H,0,-2.23469  
3,-1.340988,-0.113428\H,0,-1.287355,-0.926643,1.342599\H,0,-1.624796,0  
.769999,-1.193106\H,0,-2.302648,1.137976,0.388715\C,0,0.906818,-0.8832  
27,0.011266\C,0,2.034851,-0.517665,0.4514\O,0,-0.217969,-1.413589,-0.3  
72189\\Version=ES64L-G16RevA.03\State=1-A\HF=-306.656103\MP2=-307.8685  
211\MP3=-307.9036187\MP4D=-307.9318521\MP4DQ=-307.8985816\MP4SDQ=-307.  
9103698\CCSD=-307.9081985\CCSD(T)=-307.9685556\RMSD=4.431e-09\PG=C01 [  
X(C6H8O1)]\\@

T1 Diagnostic = 0.01249507

---

**TS from singlet 26 to 27 by O shift**

---

1\1\GINC-NSCC-N15\SP\RCCSD(T)-FC\CC-pVTZ\C6H8O1\DMTHAMAT\18-Dec-2018\0  
\\# rccsd=(t,t1diag)/cc-pvtz geom=connectivity\\TS to oxacycloheptyne  
- O shift\\0,1\C,0,1.573416,0.212258,0.300239\C,0,1.147617,-1.179083,-  
0.238604\C,0,-0.811647,1.236542,0.207922\C,0,0.668648,1.359463,-0.1807  
91\H,0,1.402897,-1.305202,-1.297111\H,0,1.665054,-1.978109,0.307599\H,  
0,1.569008,0.175083,1.393814\H,0,2.602455,0.403956,-0.017727\H,0,-1.35  
6091,2.117438,-0.145988\H,0,-0.938085,1.160289,1.293476\H,0,0.730057,1  
.447856,-1.271697\H,0,1.047403,2.300941,0.232377\C,0,-0.272663,-1.3475  
26,-0.019452\C,0,-1.461,-1.185903,0.424793\O,0,-1.473616,0.137906,-0.4  
32423\\Version=ES64L-G16RevA.03\State=1-A\HF=-306.6249929\MP2=-307.832  
0899\MP3=-307.8695519\MP4D=-307.8990279\MP4DQ=-307.8658467\MP4SDQ=-307.  
.8811969\CCSD=-307.8788412\CCSD(T)=-307.9402518\RMSD=4.343e-09\PG=C01  
[X(C6H8O1)]\\@

T1 Diagnostic = 0.01987614

---

**2-(1-thiocyclohexylidene)carbene (singlet 28)**

---

1\1\GINC-NSCC-N17\SP\RCCSD(T)-FC\CC-pVTZ\C6H8S1\DMTHAMAT\18-Dec-2018\0  
\\# rccsd=(t,t1diag)/cc-pvtz geom=connectivity\\delta thiolactonecarbe  
ne singlet\\0,1\C,0,-1.769392,0.42788,0.224105\C,0,-0.798463,1.469154,  
-0.384235\C,0,-0.029578,-1.490827,0.406126\C,0,-1.412297,-1.03984,-0.0  
85601\H,0,-0.88971,1.490589,-1.475194\H,0,-1.036436,2.469208,-0.011099  
\H,0,-1.788076,0.571634,1.309525\H,0,-2.780503,0.629784,-0.142063\H,0,  
0.157078,-2.536465,0.149272\H,0,0.086797,-1.368699,1.485606\H,0,-1.476  
503,-1.214216,-1.165811\H,0,-2.166594,-1.68571,0.377884\C,0,0.589586,1  
.119665,0.001964\C,0,1.586592,1.150055,0.835772\S,0,1.305954,-0.51079,  
-0.407307\\Version=ES64L-G16RevA.03\State=1-A\HF=-629.367234\MP2=-630.  
5199785\MP3=-630.5695467\MP4D=-630.5985523\MP4DQ=-630.5637012\MP4SDQ=-  
630.5742035\CCSD=-630.5721538\CCSD(T)=-630.6335407\RMSD=3.664e-09\PG=C  
01 [X(C6H8S1)]\\@

T1 Diagnostic = 0.01332793

---

**2-(1-thiocyclohexylidene)carbene (triplet 28)**

---

1\1\GINC-NSCC-N2\SP\UCCSD(T)-FC\CC-pVTZ\C6H8S1(3)\DMTHAMAT\18-Dec-2018  
\0\# uccsd=(t,t1diag)/cc-pvtz geom=connectivity\ldeltathiolactone car  
bene triplet\0,3\C,0,1.195339,1.301881,-0.343148\C,0,-0.243874,1.5589  
33,0.118624\C,0,1.19026,-1.227006,-0.121139\C,0,1.819223,0.082233,0.34  
3333\H,0,-0.237604,1.878572,1.16999\H,0,-0.690631,2.387135,-0.438645\H  
,0,1.21795,1.160461,-1.430283\H,0,1.794033,2.192332,-0.132324\H,0,1.52  
4969,-2.077575,0.475833\H,0,1.435797,-1.429959,-1.166841\H,0,1.722895,  
0.178061,1.43044\H,0,2.890948,0.033999,0.124632\C,0,-1.208154,0.394152  
,0.026125\C,0,-2.596158,0.518765,0.008219\S,0,-0.662386,-1.256048,-0.0  
14055\Version=ES64L-G16RevA.03\State=3-A\HF=-629.3315423\MP2=-630.434  
6986\MP3=-630.4975587\MP4D=-630.5241507\MP4DQ=-630.4927804\PUHF=-629.3  
35332\PMP2-0=-630.4371093\PMP3-0=-630.4988888\MP4SDQ=-630.5033709\CCSD  
=-630.5035718\CCSD(T)=-630.5602061\S2=2.023881\S2-1=2.006365\S2A=2.000  
28\RMSD=8.080e-09\PG=C01 [X(C6H8S1)]\@

T1 Diagnostic = 0.02068639

---

**1-thiocyclohepty-2-yne (29)**

---

1\1\GINC-NSCC-N12\SP\RCCSD(T)-FC\CC-pVTZ\C6H8S1\DMTHAMAT\18-Dec-2018\0  
\# rccsd=(t,t1diag)/cc-pvtz geom=connectivity\lthiocycloheptyne\0,1\  
C,0,1.763557,0.690549,0.242239\C,0,1.996011,-0.823764,-0.050955\C,0,-0  
.837616,1.232745,0.290912\C,0,0.524933,1.338072,-0.441019\H,0,2.404056  
, -0.954049,-1.060069\H,0,2.726224,-1.237086,0.650572\H,0,1.679852,0.82  
5901,1.325381\H,0,2.660692,1.233547,-0.072845\H,0,-1.488535,2.058411,-  
0.007843\H,0,-0.693366,1.289414,1.372519\H,0,0.42389,0.975937,-1.46917  
3\H,0,0.732084,2.41102,-0.51732\C,0,0.668025,-1.41626,0.04998\C,0,-0.5  
41763,-1.355774,-0.00781\S,0,-1.867736,-0.287281,-0.045081\Version=ES  
64L-G16RevA.03\State=1-A\HF=-629.3876734\MP2=-630.5516204\MP3=-630.595  
6965\MP4D=-630.6254837\MP4DQ=-630.5904301\MP4SDQ=-630.6009363\CCSD=-63  
0.5991374\CCSD(T)=-630.6603951\RMSD=4.307e-09\PG=C01 [X(C6H8S1)]\@

T1 Diagnostic = 0.01239136

---

**TS from singlet 28 to 29 by C shift**

---

1\1\GINC-NSCC-N14\SP\RCCSD(T)-FC\CC-pVTZ\C6H8S1\DMTHAMAT\18-Dec-2018\0  
\# rccsd=(t,t1diag)/cc-pvtz geom=connectivity\lTS to thiacycloheptyne  
- C shift\0,1\C,0,1.383737,1.068951,0.124604\C,0,1.596655,-0.317693,  
-0.473989\C,0,-1.198818,0.995565,0.455132\C,0,0.011328,1.720795,-0.135  
084\H,0,1.294113,-0.400469,-1.518787\H,0,2.640325,-0.610036,-0.40916\H  
,0,1.57925,1.017435,1.20086\H,0,2.15024,1.73006,-0.297634\H,0,-2.12340  
6,1.526172,0.218609\H,0,-1.124979,0.88399,1.538348\H,0,-0.136965,1.835  
78,-1.214724\H,0,0.026803,2.732498,0.286562\C,0,0.107876,-1.290364,0.1  
57284\C,0,1.180939,-1.775987,0.619141\S,0,-1.42473,-0.695189,-0.267913  
\Version=ES64L-G16RevA.03\State=1-A\HF=-629.3302055\MP2=-630.4862915\  
MP3=-630.5339759\MP4D=-630.563381\MP4DQ=-630.5281404\MP4SDQ=-630.53837  
21\CCSD=-630.5364791\CCSD(T)=-630.5986391\RMSD=6.204e-09\PG=C01 [X(C6H  
8S1)]\@

T1 Diagnostic = 0.01302430

---

**TS from singlet 28 to 29 by S shift**

---

1\1\GINC-NSCC-N15\SP\RCCSD(T)-FC\CC-pVTZ\C6H8S1\DMTHAMAT\18-Dec-2018\0  
\\# rccsd=(t,t1diag)/cc-pvtz geom=connectivity\\TS top thiocycloheptyn  
e - S shift\\0,1\C,0,1.889632,0.040272,0.209017\C,0,1.267481,-1.275063  
, -0.314362\C,0,-0.312753,1.409535,0.395665\C,0,1.108486,1.305477,-0.17  
9412\H,0,1.344315,-1.337614,-1.406403\H,0,1.803843,-2.140642,0.091609\  
H,0,1.96873,-0.020027,1.29933\H,0,2.907788,0.116272,-0.183838\H,0,-0.7  
31621,2.395536,0.17433\H,0,-0.318856,1.280449,1.481032\H,0,1.058476,1.  
391023,-1.270732\H,0,1.674357,2.17479,0.175711\C,0,-0.12585,-1.384328,  
0.086241\C,0,-1.283957,-1.420194,0.582095\S,0,-1.560329,0.255377,-0.31  
4781\\Version=ES64L-G16RevA.03\State=1-A\HF=-629.3506307\MP2=-630.5049  
352\MP3=-630.5535221\MP4D=-630.5825469\MP4DQ=-630.5473684\MP4SDQ=-630.  
5587816\CCSD=-630.5571853\CCSD(T)=-630.6191813\RMSD=6.624e-09\PG=C01 [  
X(C6H8S1)]\\@

T1 Diagnostic = 0.01671983

## Summary output of (R/U)CCSD(T)/cc-pVTZ//CCSD/6-311+G\*\* calculations

---

### 2-(1-azacyclobutylidene)carbene (singlet 12)

---

Charge = 0 Multiplicity = 1

Redundant internal coordinates found in file.

C,0,1.3937124166,0.0406064948,0.2737463325  
C,0,0.2927805273,1.0881630052,-0.0628756478  
H,0,2.034105936,-0.1620721231,-0.5930240344  
H,0,2.0025072284,0.2127454021,1.1649767558  
H,0,0.450387434,1.7183976744,-0.937819743  
H,0,-0.0143544242,1.6814063804,0.8013211735  
C,0,-0.6029117571,-0.155732809,-0.2496112417  
C,0,-1.7266047075,-0.21865819,-0.9495513973  
N,0,0.3203078509,-0.97895688,0.46333425  
H,0,0.4781837856,-1.9086020247,0.0889478827

Zero-point correction= 0.080515 (Hartree/Particle)

Thermal correction to Energy= 0.085330

Thermal correction to Enthalpy= 0.086274

Thermal correction to Gibbs Free Energy= 0.053032

Sum of electronic and zero-point Energies= -209.375261

Sum of electronic and thermal Energies= -209.370446

Sum of electronic and thermal Enthalpies= -209.369502

Sum of electronic and thermal Free Energies= -209.402744

---

### 2-(1-azacyclobutylidene)carbene (triplet 12)

---

Charge = 0 Multiplicity = 3

Redundant internal coordinates found in file.

C,0,1.38854623,-0.15332019,0.  
C,0,0.42738827,1.07528184,0.  
H,0,2.00005505,-0.27724234,-0.89864571  
H,0,2.00005505,-0.27724234,0.89864571  
H,0,0.46622202,1.69811961,-0.89651124  
H,0,0.46622202,1.69811961,0.89651124  
C,0,-0.71925931,0.03954787,0.  
C,0,-2.12425373,0.04363259,0.  
N,0,0.17407715,-0.98410361,0.  
H,0,0.01434652,-1.98386784,0.

Zero-point correction= 0.079454 (Hartree/Particle)

Thermal correction to Energy= 0.084400

Thermal correction to Enthalpy= 0.085345

Thermal correction to Gibbs Free Energy= 0.050785

Sum of electronic and zero-point Energies= -209.349886

Sum of electronic and thermal Energies= -209.344939

Sum of electronic and thermal Enthalpies= -209.343995

Sum of electronic and thermal Free Energies= -209.378555

S\*\*2 before annihilation 2.0290, after 2.0004

---

**1-azacyclopent-2-yne (13)**

---

Charge = 0 Multiplicity = 1

Redundant internal coordinates found in file.

C,0,-0.9447322867,-0.1506947145,0.513951684  
C,0,-0.5370065731,1.1440609554,-0.3157189949  
H,0,-0.9877722642,0.1139391761,1.5764021693  
H,0,-1.8958191614,-0.6134533154,0.2247811341  
H,0,-0.9922946824,2.0478126811,0.0990309548  
H,0,-0.8154650866,1.0607172342,-1.373384989  
C,0,0.9876868244,1.0436719972,-0.0662414985  
C,0,1.1605193465,-0.2181241116,-0.1472309173  
N,0,0.2179492446,-1.088012823,0.3180309513  
H,0,0.0507326389,-1.9024230795,-0.2578994839

Zero-point correction= 0.080758 (Hartree/Particle)

Thermal correction to Energy= 0.085366

Thermal correction to Enthalpy= 0.086310

Thermal correction to Gibbs Free Energy= 0.053763

Sum of electronic and zero-point Energies= -209.366785

Sum of electronic and thermal Energies= -209.362177

Sum of electronic and thermal Enthalpies= -209.361232

Sum of electronic and thermal Free Energies= -209.393780

---

**TS from singlet 12 to 13 by C shift**

---

Charge = 0 Multiplicity = 1

Redundant internal coordinates found in file.

C,0,-0.3784278518,1.0010202073,-0.1227232957  
H,0,-0.7261316528,1.4065224957,-1.0757384527  
H,0,-0.405081323,1.774560257,0.6473015565  
C,0,1.1858946356,-1.2969652371,0.5167879221  
C,0,-0.0331893635,-0.9385829448,0.4399307048  
C,0,1.0542282008,0.3272021495,-0.2293817271  
H,0,1.3849929201,0.1936176478,-1.2591839859  
H,0,1.7937115624,0.8559495465,0.3670441104  
N,0,-1.1942951461,-0.1782474839,0.3210804377  
H,0,-1.7838215216,-0.533196788,-0.4276128502

Zero-point correction= 0.079838 (Hartree/Particle)

Thermal correction to Energy= 0.084360

Thermal correction to Enthalpy= 0.085304

Thermal correction to Gibbs Free Energy= 0.052550

Sum of electronic and zero-point Energies= -209.362790

Sum of electronic and thermal Energies= -209.358268

Sum of electronic and thermal Enthalpies= -209.357324

Sum of electronic and thermal Free Energies= -209.390078

\*\*\*\*\* 1 imaginary frequencies (negative Signs) \*\*\*\*\* -146.5757 cm<sup>-1</sup>

---

**TS from singlet 12 to 13 by N shift**

---

Charge = 0 Multiplicity = 1

Redundant internal coordinates found in file.

C,0,0.825099146,-0.8461402598,0.182535972  
C,0,1.1116689998,0.6602908549,-0.0044425748  
H,0,1.3162488159,-1.4451960331,-0.587476017  
H,0,1.0885320947,-1.2309702009,1.1702032087  
H,0,1.7939994135,0.8922697779,-0.8242361771  
H,0,1.4224485083,1.1772597597,0.9064067978  
C,0,-1.5078461354,0.4325432952,0.0085650001  
C,0,-0.3274485659,0.8681093706,-0.3312921909  
N,0,-0.7034235931,-0.9397959602,0.0164751238  
H,0,-0.931860304,-1.4404908145,-0.8395982128

Zero-point correction= 0.079296 (Hartree/Particle)

Thermal correction to Energy= 0.083727

Thermal correction to Enthalpy= 0.084671

Thermal correction to Gibbs Free Energy= 0.052314

Sum of electronic and zero-point Energies= -209.344029

Sum of electronic and thermal Energies= -209.339598

Sum of electronic and thermal Enthalpies= -209.338654

Sum of electronic and thermal Free Energies= -209.371011

\*\*\*\*\* 1 imaginary frequencies (negative Signs) \*\*\*\*\* -218.7748 cm<sup>-1</sup>

---

**2-(1-oxacyclobutylidene)carbene (singlet 14)**

---

Charge = 0 Multiplicity = 1

Redundant internal coordinates found in file.

C,0,1.3283097628,-0.0468871138,0.  
C,0,0.2750462649,1.0915832717,0.  
H,0,1.9419422524,-0.1239946237,-0.9005181713  
H,0,1.9419422524,-0.1239946237,0.9005181713  
H,0,0.2499920311,1.7089006226,-0.8989348468  
H,0,0.2499920311,1.7089006226,0.8989348468  
C,0,-0.6972815838,-0.0938073457,0.  
C,0,-2.0305214287,-0.064657345,0.  
O,0,0.2818935027,-1.064747908,0.

Zero-point correction= 0.067702 (Hartree/Particle)

Thermal correction to Energy= 0.072508

Thermal correction to Enthalpy= 0.073452

Thermal correction to Gibbs Free Energy= 0.039787

Sum of electronic and zero-point Energies= -229.224965

Sum of electronic and thermal Energies= -229.220159

Sum of electronic and thermal Enthalpies= -229.219215

Sum of electronic and thermal Free Energies= -229.252880



---

**2-(1-oxacyclobutylidene)carbene (triplet 14)**

---

Charge = 0 Multiplicity = 3

Redundant internal coordinates found in file.

C,0,0.1770749634,1.3419847222,0.  
C,0,-1.0679631163,0.4339880481,0.  
H,0,0.3562640831,1.9293207444,-0.901935317  
H,0,0.3562640831,1.9293207444,0.901935317  
H,0,-1.6915920427,0.4701742658,-0.8962720562  
H,0,-1.6915920427,0.4701742658,0.8962720562  
C,0,-0.0313915242,-0.6837659081,0.  
C,0,-0.010192172,-2.0893701414,0.  
O,0,1.0344443295,0.1494334014,0.

Zero-point correction= 0.067346 (Hartree/Particle)

Thermal correction to Energy= 0.071934

Thermal correction to Enthalpy= 0.072878

Thermal correction to Gibbs Free Energy= 0.039007

Sum of electronic and zero-point Energies= -229.195349

Sum of electronic and thermal Energies= -229.190760

Sum of electronic and thermal Enthalpies= -229.189816

Sum of electronic and thermal Free Energies= -229.223688

S\*\*2 before annihilation 2.0175, after 2.0001

---

**1-oxacyclopent-2-yne (15)**

---

Charge = 0 Multiplicity = 1

Redundant internal coordinates found in file.

C,0,0.9907719822,-0.2197163,-0.1706516289  
C,0,0.3907691947,1.2169820125,0.0981057073  
H,0,1.0702923596,-0.3882247857,-1.250165951  
H,0,1.9387027147,-0.4468882202,0.3243382722  
H,0,0.7837301917,1.9485195818,-0.6130110082  
H,0,0.5887263074,1.5634824668,1.1181523001  
C,0,-1.0836824791,0.8330462212,-0.129976167  
C,0,-1.1031455041,-0.3570820151,0.278279497  
O,0,-0.0352267671,-1.1585329715,0.3447949785

Zero-point correction= 0.068257 (Hartree/Particle)

Thermal correction to Energy= 0.072693

Thermal correction to Enthalpy= 0.073637

Thermal correction to Gibbs Free Energy= 0.041359

Sum of electronic and zero-point Energies= -229.205347

Sum of electronic and thermal Energies= -229.200912

Sum of electronic and thermal Enthalpies= -229.199967

Sum of electronic and thermal Free Energies= -229.232246

---

**TS from singlet 14 to 15 by C shift**

---

Charge = 0 Multiplicity = 1

Redundant internal coordinates found in file.

C,0,0.9398406871,0.6232635029,-0.0650607193  
C,0,-0.5836017453,1.0264361151,0.0526490858  
H,0,1.5291244717,1.175942762,-0.7995144154  
H,0,1.4224205782,0.6273726546,0.9165391661  
H,0,-0.9836996315,1.4210372786,-0.8851800368  
H,0,-0.731009857,1.7596148124,0.8492195696  
C,0,-0.3685108587,-0.9629793107,-0.118179429  
C,0,-1.3026017135,-0.3535558238,0.4683745102  
O,0,0.879262069,-0.8006819913,-0.5135747311

Zero-point correction= 0.066897 (Hartree/Particle)

Thermal correction to Energy= 0.071136

Thermal correction to Enthalpy= 0.072080

Thermal correction to Gibbs Free Energy= 0.040053

Sum of electronic and zero-point Energies= -229.204788

Sum of electronic and thermal Energies= -229.200549

Sum of electronic and thermal Enthalpies= -229.199605

Sum of electronic and thermal Free Energies= -229.231632

\*\*\*\*\* 1 imaginary frequencies (negative Signs) \*\*\*\*\* -328.9302 cm<sup>-1</sup>

---

**TS from singlet 14 to 15 by O shift**

---

Charge = 0 Multiplicity = 1

Redundant internal coordinates found in file.

C,0,0.9691446982,0.5944855923,-0.0184395849  
C,0,0.9559735357,-0.9509303426,0.0621235806  
H,0,1.5832177374,1.0721015295,0.7455947962  
H,0,1.2328557496,0.9585647171,-1.0159430851  
H,0,1.4272157068,-1.3566120159,0.9593024202  
H,0,1.3336877248,-1.4539919543,-0.8315290932  
C,0,-1.4055571701,-0.0499503824,-0.3613930736  
C,0,-0.5320157554,-0.9093200942,0.1386605726  
O,0,-0.4380267871,0.9722371004,0.258375547

Zero-point correction= 0.065625 (Hartree/Particle)

Thermal correction to Energy= 0.070067

Thermal correction to Enthalpy= 0.071012

Thermal correction to Gibbs Free Energy= 0.038581

Sum of electronic and zero-point Energies= -229.175866

Sum of electronic and thermal Energies= -229.171423

Sum of electronic and thermal Enthalpies= -229.170479

Sum of electronic and thermal Free Energies= -229.202909

\*\*\*\*\* 1 imaginary frequencies (negative Signs) \*\*\*\*\* -316.2697 cm<sup>-1</sup>

---

**2-(1-thiocyclobutylidene)carbene (singlet 16)**

---

Charge = 0 Multiplicity = 1

Redundant internal coordinates found in file.

C,0,0.9595252334,2.7880362551,0.0648817568  
C,0,-0.5837070488,2.7934566287,-0.081405909  
H,0,1.5020252576,3.397159566,-0.6590884701  
H,0,1.2888013291,3.0128816887,1.0808566085  
H,0,-0.8976817404,3.1591899821,-1.0629672678  
H,0,-1.1287129737,3.3210161753,0.7047112396  
C,0,-0.7025983106,1.2635187042,-0.0213233754  
C,0,-1.7349352316,0.4899125648,0.25095016  
S,0,1.046071255,0.9712876751,-0.2741208426

Zero-point correction= 0.065111 (Hartree/Particle)

Thermal correction to Energy= 0.070271

Thermal correction to Enthalpy= 0.071215

Thermal correction to Gibbs Free Energy= 0.036364

Sum of electronic and zero-point Energies= -551.858042

Sum of electronic and thermal Energies= -551.852882

Sum of electronic and thermal Enthalpies= -551.851937

Sum of electronic and thermal Free Energies= -551.886789

---

**2-(1-thiocyclobutylidene)carbene (triplet 16)**

---

Charge = 0 Multiplicity = 3

Redundant internal coordinates found in file.

C,0,1.3386360556,0.5672826178,0.  
C,0,0.0035385106,1.3546411344,0.  
H,0,1.9481571912,0.6941890035,-0.8959817532  
H,0,1.9481571912,0.6941890035,0.8959817532  
H,0,-0.1518905683,1.973495116,-0.8898900497  
H,0,-0.1518905683,1.973495116,0.8898900497  
C,0,-0.8794451021,0.1075815319,0.  
C,0,-2.2543676151,-0.1211913945,0.  
S,0,0.440197026,-1.0423992815,0.

Zero-point correction= 0.064239 (Hartree/Particle)

Thermal correction to Energy= 0.069288

Thermal correction to Enthalpy= 0.070232

Thermal correction to Gibbs Free Energy= 0.034622

Sum of electronic and zero-point Energies= -551.816672

Sum of electronic and thermal Energies= -551.811623

Sum of electronic and thermal Enthalpies= -551.810679

Sum of electronic and thermal Free Energies= -551.846289

S\*\*2 before annihilation 2.0215, after 2.0002

---

**1-thiocyclopent-2-yne (17)**

---

Charge = 0 Multiplicity = 1

Redundant internal coordinates found in file.

C,0,0.980166349,0.3538762475,0.1089205317  
C,0,0.0257257284,1.5748177276,-0.1380438279  
H,0,1.8784630989,0.3632642921,-0.5164640743  
H,0,1.2742859015,0.3431434615,1.1628371333  
H,0,-0.0132501712,1.8515230742,-1.1979564886

H,0,0.342650932,2.4382161866,0.451905657  
C,0,-1.2601090602,0.9296784626,0.2929669461  
C,0,-1.4883474131,-0.2778868422,0.1129120309  
S,0,-0.0364273553,-1.1977216097,-0.2089189183

Zero-point correction= 0.066046 (Hartree/Particle)  
Thermal correction to Energy= 0.070949  
Thermal correction to Enthalpy= 0.071893  
Thermal correction to Gibbs Free Energy= 0.037994  
Sum of electronic and zero-point Energies= -551.858937  
Sum of electronic and thermal Energies= -551.854034  
Sum of electronic and thermal Enthalpies= -551.853090  
Sum of electronic and thermal Free Energies= -551.886989

---

**TS from singlet 16 to 17 by C shift**

---

Charge = 0 Multiplicity = 1  
Redundant internal coordinates found in file.  
C,0,0.2358255915,1.1987191627,0.1559328055  
C,0,-1.2127201294,0.6887642353,-0.1756889493  
H,0,0.5487820655,2.0136888347,-0.4996494396  
H,0,0.3084327202,1.4992874479,1.2030612437  
H,0,-1.4524911687,0.8323168261,-1.2299475975  
H,0,-1.9366477723,1.1872581863,0.4675216991  
C,0,-0.3399994159,-0.9618544725,0.087775201  
C,0,-1.6067212447,-0.9639109401,0.1464388004  
S,0,1.2607572637,-0.3163764404,-0.1058588834

Zero-point correction= 0.064227 (Hartree/Particle)  
Thermal correction to Energy= 0.068988  
Thermal correction to Enthalpy= 0.069932  
Thermal correction to Gibbs Free Energy= 0.036073  
Sum of electronic and zero-point Energies= -551.837365  
Sum of electronic and thermal Energies= -551.832605  
Sum of electronic and thermal Enthalpies= -551.831661  
Sum of electronic and thermal Free Energies= -551.865519

\*\*\*\*\* 1 imaginary frequencies (negative Signs) \*\*\*\*\* -313.1815 cm<sup>-1</sup>

---

**TS from singlet 16 to 17 by S shift**

---

Charge = 0 Multiplicity = 1  
Redundant internal coordinates found in file.  
C,0,1.0487358686,-0.7083242239,0.3330797552  
C,0,1.3166898037,0.7117182621,-0.2107393658  
H,0,1.6208640362,-1.5036036973,-0.1482847516  
H,0,1.1517001371,-0.7512081862,1.4196069082  
H,0,1.6761129817,0.6904639671,-1.2440852899  
H,0,1.9666544907,1.3400741274,0.4032436428  
C,0,-0.119265212,1.1133959028,-0.1410529492  
C,0,-1.3104350431,1.1019933282,0.3401104611  
S,0,-0.7591381729,-0.8205566002,-0.1401780207

Zero-point correction= 0.064455 (Hartree/Particle)  
Thermal correction to Energy= 0.069172  
Thermal correction to Enthalpy= 0.070116  
Thermal correction to Gibbs Free Energy= 0.036435

Sum of electronic and zero-point Energies= -551.849306  
Sum of electronic and thermal Energies= -551.844588  
Sum of electronic and thermal Enthalpies= -551.843644  
Sum of electronic and thermal Free Energies= -551.877325

\*\*\*\*\* 1 imaginary frequencies (negative Signs) \*\*\*\*\* -200.3235 cm<sup>-1</sup>

---

### 2-(1-azacyclopentylidene)carbene (singlet 18)

---

Charge = 0 Multiplicity = 1  
Redundant internal coordinates found in file. (old form).  
C,0,0.1967777493,1.1958873496,0.1675939333  
C,0,-1.2340278228,0.7815512268,-0.2396375712  
C,0,-1.2966173143,-0.6852440188,0.1920792247  
H,0,0.5986610366,2.0171294618,-0.429727876  
H,0,0.2250329276,1.4819539991,1.2247678127  
H,0,-1.3540587853,0.8494979964,-1.3260477498  
H,0,-1.995716521,1.4006064338,0.2437662935  
H,0,-1.4494616398,-0.7576645239,1.2808464595  
H,0,-2.0816991152,-1.2540797545,-0.3152466072  
C,0,0.9622853315,-0.1277866529,-0.0282179563  
C,0,2.29003941,-0.0916907322,-0.018017654  
N,0,0.0287905944,-1.1743665706,-0.2224972079  
H,0,0.3074696591,-2.0619925246,0.1754474687

Zero-point correction= 0.110763 (Hartree/Particle)  
Thermal correction to Energy= 0.116412  
Thermal correction to Enthalpy= 0.117356  
Thermal correction to Gibbs Free Energy= 0.081664  
Sum of electronic and zero-point Energies= -248.589628  
Sum of electronic and thermal Energies= -248.583978  
Sum of electronic and thermal Enthalpies= -248.583034  
Sum of electronic and thermal Free Energies= -248.618727

---

### 2-(1-azacyclopentylidene)carbene (triplet 18)

---

Charge = 0 Multiplicity = 3  
Redundant internal coordinates found in file. (old form).  
C,0,0.1815577063,1.2138967636,0.1464261192  
C,0,-1.2622284332,0.7996068819,-0.2069038225  
C,0,-1.3224462115,-0.68312123,0.207483138  
H,0,0.5900101004,1.9924638167,-0.5017007572  
H,0,0.2567477935,1.5648517189,1.184445861  
H,0,-1.4163141606,0.8800487671,-1.2887043448  
H,0,-2.0230407341,1.4008576345,0.2983304614  
H,0,-1.6305400998,-0.803543948,1.2551449114  
H,0,-1.9802435792,-1.2868311848,-0.4248803648  
C,0,0.971689692,-0.0843794994,0.0221948713  
C,0,2.3725389973,-0.2732781844,-0.0812526464  
N,0,0.0738459257,-1.0922908317,0.0441177471  
H,0,0.3858985132,-2.0544790143,0.0504073965

Zero-point correction= 0.110700 (Hartree/Particle)  
Thermal correction to Energy= 0.116226  
Thermal correction to Enthalpy= 0.117170  
Thermal correction to Gibbs Free Energy= 0.080900

|                                              |             |
|----------------------------------------------|-------------|
| Sum of electronic and zero-point Energies=   | -248.564331 |
| Sum of electronic and thermal Energies=      | -248.558806 |
| Sum of electronic and thermal Enthalpies=    | -248.557862 |
| Sum of electronic and thermal Free Energies= | -248.594131 |

S\*\*2 before annihilation 2.0223, after 2.0002

---

### 1-azacyclohex-2-yne (19)

---

Charge = 0 Multiplicity = 1

Redundant internal coordinates found in file. (old form).

C,0,1.5807642018,-0.1525843815,0.1665430373  
 C,0,0.6753788903,1.0497134881,-0.284253037  
 C,0,-0.7739054103,1.0038193204,0.2521079503  
 H,0,2.4619641723,-0.2231632982,-0.4794536644  
 H,0,1.9257744115,-0.0346853051,1.2002752249  
 H,0,0.6365099551,1.0587395008,-1.380194153  
 H,0,1.1280849596,1.9949215386,0.0442243334  
 H,0,-0.7476145249,1.0166789081,1.3528866155  
 H,0,-1.3180574776,1.8881657319,-0.0978769062  
 C,0,0.6146198895,-1.2816617917,0.0289764144  
 C,0,-0.6114005751,-1.2437652925,-0.0428738165  
 N,0,-1.5177185329,-0.2077105596,-0.2361989544  
 H,0,-2.4034452192,-0.3200990591,0.2439330857

|                                              |                             |
|----------------------------------------------|-----------------------------|
| Zero-point correction=                       | 0.111691 (Hartree/Particle) |
| Thermal correction to Energy=                | 0.117074                    |
| Thermal correction to Enthalpy=              | 0.118018                    |
| Thermal correction to Gibbs Free Energy=     | 0.083273                    |
| Sum of electronic and zero-point Energies=   | -248.597129                 |
| Sum of electronic and thermal Energies=      | -248.591747                 |
| Sum of electronic and thermal Enthalpies=    | -248.590803                 |
| Sum of electronic and thermal Free Energies= | -248.625548                 |

---

### TS from singlet 18 to 19 by C shift

---

Charge = 0 Multiplicity = 1

Redundant internal coordinates found in file. (old form).

C,0,0.7475615713,0.9407619866,0.4133383559  
 C,0,-0.6398190442,1.1550734613,-0.2109149029  
 C,0,-1.4626410526,-0.1544622649,-0.1091864104  
 H,0,1.4265100398,1.7473917409,0.1437980208  
 H,0,0.727175894,0.8420267834,1.5031172111  
 H,0,-0.5007463074,1.4277801821,-1.2621758882  
 H,0,-1.1563357816,1.9847742494,0.2876385829  
 H,0,-2.1636552378,-0.1319205535,0.7317887418  
 H,0,-2.0313308586,-0.3350225854,-1.025842368  
 C,0,0.7567378128,-0.8048664529,-0.0774896295  
 C,0,1.8713086518,-0.3011715813,-0.4350339399  
 N,0,-0.5038102302,-1.2759888792,0.1172963582  
 H,0,-0.6204874572,-1.7096300865,1.0258858682

|                                            |                             |
|--------------------------------------------|-----------------------------|
| Zero-point correction=                     | 0.109436 (Hartree/Particle) |
| Thermal correction to Energy=              | 0.114865                    |
| Thermal correction to Enthalpy=            | 0.115810                    |
| Thermal correction to Gibbs Free Energy=   | 0.080553                    |
| Sum of electronic and zero-point Energies= | -248.571743                 |

Sum of electronic and thermal Energies= -248.566314  
Sum of electronic and thermal Enthalpies= -248.565369  
Sum of electronic and thermal Free Energies= -248.600626

\*\*\*\*\* 1 imaginary frequencies (negative Signs) \*\*\*\*\* -392.7320 cm<sup>-1</sup>

---

### TS from singlet 18 to 19 by N shift

---

Charge = 0 Multiplicity = 1  
Redundant internal coordinates found in file. (old form).  
C,0,-0.1570866268,1.222505905,-0.3287717371  
C,0,-1.3490880686,0.4005676793,0.1747223141  
H,0,-0.0747559487,1.1468820072,-1.4191543022  
H,0,-0.2671591195,2.2822838366,-0.0664369304  
H,0,-1.4767832239,0.5724566738,1.2506620689  
H,0,-2.2891990315,0.6588637459,-0.3278199122  
C,0,0.4654819385,-1.0863200617,0.0582355537  
C,0,1.6765962789,-0.7146872079,-0.1248855781  
N,0,1.1295130309,0.7758437762,0.2340604547  
H,0,1.1469880512,0.8866332845,1.2453506638  
C,0,-0.995892481,-1.1112410629,-0.0486711324  
H,0,-1.3014274613,-1.4371415745,-1.0492372942  
H,0,-1.4792263381,-1.7438970015,0.7016758314

Zero-point correction= 0.109206 (Hartree/Particle)  
Thermal correction to Energy= 0.114449  
Thermal correction to Enthalpy= 0.115393  
Thermal correction to Gibbs Free Energy= 0.080790  
Sum of electronic and zero-point Energies= -248.551632  
Sum of electronic and thermal Energies= -248.546389  
Sum of electronic and thermal Enthalpies= -248.545445  
Sum of electronic and thermal Free Energies= -248.580048

\*\*\*\*\* 1 imaginary frequencies (negative Signs) \*\*\*\*\* -485.4867 cm<sup>-1</sup>

---

### 2-(1-oxacyclopentylidene)carbene (singlet 20)

---

Charge = 0 Multiplicity = 1  
Redundant internal coordinates found in file. (old form).  
C,0,0.3329615883,0.5437173261,0.19456463  
C,0,1.7808518664,0.557218995,-0.3329133005  
C,0,2.2399969076,1.9559194264,0.0742365761  
H,0,-0.3214867767,-0.1596860708,-0.3241154026  
H,0,0.3125403137,0.3271690024,1.2689842005  
H,0,1.7887557641,0.4597088102,-1.4236877223  
H,0,2.3970887449,-0.2337453831,0.1048374675  
H,0,2.5372414812,1.9896515815,1.1303657549  
H,0,3.0397042667,2.3680067268,-0.5448725243  
O,0,1.0812766535,2.796174662,-0.1110300066  
C,0,-0.0336628623,2.0087565762,-0.0482362623  
C,0,-1.3169516674,2.3348830172,-0.2058335105

Zero-point correction= 0.098078 (Hartree/Particle)  
Thermal correction to Energy= 0.103558  
Thermal correction to Enthalpy= 0.104502  
Thermal correction to Gibbs Free Energy= 0.069117  
Sum of electronic and zero-point Energies= -268.438383

Sum of electronic and thermal Energies= -268.432904  
Sum of electronic and thermal Enthalpies= -268.431960  
Sum of electronic and thermal Free Energies= -268.467345

---

**2-(1-oxacyclopentylidene)carbene (triplet 20)**

---

Charge = 0 Multiplicity = 3  
Redundant internal coordinates found in file. (old form).  
C,0,0.0357740571,1.2025848759,0.1843072352  
C,0,-1.3392248822,0.660534694,-0.2356722095  
C,0,-1.2035209625,-0.8176618858,0.1318524542  
H,0,0.3878540201,2.0610101251,-0.3914075842  
H,0,0.0538047806,1.4767864906,1.2484646986  
H,0,-1.4770022781,0.7685166806,-1.3169373591  
H,0,-2.1771251143,1.1396742791,0.2776743772  
H,0,-1.4347077152,-1.0066054596,1.1864241462  
H,0,-1.76812566,-1.5061904894,-0.4987249489  
O,0,0.2035960859,-1.1173290924,-0.0634890789  
C,0,0.9377119811,-0.0015105131,-0.0155858756  
C,0,2.3501949676,-0.033998385,-0.1390237955

Zero-point correction= 0.097807 (Hartree/Particle)  
Thermal correction to Energy= 0.103147  
Thermal correction to Enthalpy= 0.104092  
Thermal correction to Gibbs Free Energy= 0.068106  
Sum of electronic and zero-point Energies= -268.403409  
Sum of electronic and thermal Energies= -268.398069  
Sum of electronic and thermal Enthalpies= -268.397125  
Sum of electronic and thermal Free Energies= -268.433111

S\*\*2 before annihilation 2.0164, after 2.0001

---

**1-oxacyclohex-2-yne (21)**

---

Charge = 0 Multiplicity = 1  
Redundant internal coordinates found in file. (old form).  
C,0,1.568883899,-0.0549517774,0.0854787033  
C,0,0.5670927751,1.0932306282,-0.2789031032  
C,0,-0.8524153398,0.9159834992,0.3052737915  
H,0,2.373849847,-0.1020262648,-0.6545533152  
H,0,2.0281388714,0.0961202616,1.0688772168  
H,0,0.4812754646,1.1530124859,-1.3706807255  
H,0,0.9441521244,2.0604379678,0.0801831319  
H,0,-0.8182375043,0.8619064891,1.3999129494  
H,0,-1.5103900866,1.7282983277,-0.0115481925  
O,0,-1.521293017,-0.3140817488,-0.166183752  
C,0,0.67035251,-1.2620563168,0.0941907785  
C,0,-0.5372072839,-1.2007017919,-0.1255344831

Zero-point correction= 0.098654 (Hartree/Particle)  
Thermal correction to Energy= 0.103937  
Thermal correction to Enthalpy= 0.104881  
Thermal correction to Gibbs Free Energy= 0.070298  
Sum of electronic and zero-point Energies= -268.439469  
Sum of electronic and thermal Energies= -268.434186  
Sum of electronic and thermal Enthalpies= -268.433242  
Sum of electronic and thermal Free Energies= -268.467825



---

**TS from singlet 20 to 21 by C shift**

---

Charge = 0 Multiplicity = 1

Redundant internal coordinates found in file. (old form).

C,0,0.747136978,1.0781371975,0.0542272899  
C,0,-0.7831255182,1.0706085245,-0.21100825  
C,0,-1.3656029176,-0.242363134,0.3025660623  
H,0,1.2592789498,1.6598877856,-0.7097105997  
H,0,0.9568519387,1.4736743227,1.0472442276  
H,0,-0.975889672,1.1347535043,-1.2867978983  
H,0,-1.2439906221,1.9349899234,0.2803090441  
H,0,-1.3157224307,-0.3214492472,1.3948428018  
H,0,-2.3734897342,-0.4629687862,-0.0515500587  
O,0,-0.4873458636,-1.2446568863,-0.2795773106  
C,0,0.7256640851,-0.780392982,-0.0885533612  
C,0,1.8947017568,-0.3587653823,0.1739694629

Zero-point correction= 0.097191 (Hartree/Particle)  
Thermal correction to Energy= 0.102295  
Thermal correction to Enthalpy= 0.103239  
Thermal correction to Gibbs Free Energy= 0.068714  
Sum of electronic and zero-point Energies= -268.416850  
Sum of electronic and thermal Energies= -268.411747  
Sum of electronic and thermal Enthalpies= -268.410803  
Sum of electronic and thermal Free Energies= -268.445328

\*\*\*\*\* 1 imaginary frequencies (negative Signs) \*\*\*\*\* -349.8254 cm<sup>-1</sup>

---

**TS from singlet 20 to 21 by O shift**

---

Charge = 0 Multiplicity = 1

Redundant internal coordinates found in file. (old form).

C,0,-1.1712988171,-0.9259787525,0.0338378576  
C,0,-1.2202278575,0.6456378073,-0.1023194548  
C,0,0.1409412872,1.2144946345,0.2956510517  
H,0,-1.5016273201,-1.2321675857,1.03311215  
H,0,-1.7937426964,-1.4086618001,-0.7238162325  
H,0,-2.0356009754,1.0493063846,0.5086827899  
H,0,-1.4111996944,0.8905178292,-1.1518801931  
H,0,0.2372105635,2.2630921511,-0.005339123  
H,0,0.3148892977,1.1255092623,1.3758763257  
O,0,1.1642768044,0.5173755886,-0.4227792738  
C,0,0.262776176,-1.1806535403,-0.1078859241  
C,0,1.4735786722,-0.8777577189,0.2485331563

Zero-point correction= 0.096173 (Hartree/Particle)  
Thermal correction to Energy= 0.101244  
Thermal correction to Enthalpy= 0.102188  
Thermal correction to Gibbs Free Energy= 0.067928  
Sum of electronic and zero-point Energies= -268.387174  
Sum of electronic and thermal Energies= -268.382102  
Sum of electronic and thermal Enthalpies= -268.381158  
Sum of electronic and thermal Free Energies= -268.415419

\*\*\*\*\* 1 imaginary frequencies (negative Signs) \*\*\*\*\* -503.6318 cm<sup>-1</sup>

---

**2-(1-thiocyclopentylidene)carbene (singlet 22)**

---

Charge = 0 Multiplicity = 1

Redundant internal coordinates found in file. (old form).

C,0,0.3132738483,0.6005809207,0.2449659416  
C,0,1.7881021786,0.568955982,-0.181241129  
C,0,2.3513268435,1.9563286682,0.1337808661  
H,0,-0.2503688975,-0.2630401308,-0.1193423927  
H,0,0.2308893929,0.6404697841,1.3382214279  
H,0,1.8532469965,0.3767648273,-1.2580149599  
H,0,2.3405997367,-0.2151520518,0.3499674417  
H,0,2.5432922669,2.068628359,1.2050369623  
H,0,3.2676135656,2.1716588279,-0.4215011266  
C,0,-0.2096049537,1.917361416,-0.3390381743  
C,0,-1.4506951678,1.9656805233,-0.784174496  
S,0,1.0606404598,3.1595375542,-0.3863604512

|                                              |                             |
|----------------------------------------------|-----------------------------|
| Zero-point correction=                       | 0.094963 (Hartree/Particle) |
| Thermal correction to Energy=                | 0.100934                    |
| Thermal correction to Enthalpy=              | 0.101878                    |
| Thermal correction to Gibbs Free Energy=     | 0.064873                    |
| Sum of electronic and zero-point Energies=   | -591.067464                 |
| Sum of electronic and thermal Energies=      | -591.061493                 |
| Sum of electronic and thermal Enthalpies=    | -591.060549                 |
| Sum of electronic and thermal Free Energies= | -591.097554                 |

---

**2-(1-thiocyclopentylidene)carbene (triplet 22)**

---

Charge = 0 Multiplicity = 3

Redundant internal coordinates found in file. (old form).

C,0,0.3334858882,0.5719306863,0.2074421036  
C,0,1.824104436,0.5457614504,-0.1531510183  
C,0,2.3553701713,1.9599906859,0.1139524315  
H,0,-0.228774317,-0.2619858756,-0.2218231407  
H,0,0.1981427506,0.5416460494,1.2988157446  
H,0,1.9376853003,0.3119331897,-1.2183710456  
H,0,2.3809306012,-0.1991493858,0.4258412012  
H,0,2.5111558381,2.1360132476,1.1836126971  
H,0,3.2794752037,2.1841025221,-0.4241518008  
C,0,-0.2231963776,1.8933562677,-0.3078464107  
C,0,-1.5569711257,2.1881575705,-0.6501609688  
S,0,1.0269079009,3.0760182717,-0.4718598831

|                                              |                             |
|----------------------------------------------|-----------------------------|
| Zero-point correction=                       | 0.094459 (Hartree/Particle) |
| Thermal correction to Energy=                | 0.100215                    |
| Thermal correction to Enthalpy=              | 0.101160                    |
| Thermal correction to Gibbs Free Energy=     | 0.063853                    |
| Sum of electronic and zero-point Energies=   | -591.021617                 |
| Sum of electronic and thermal Energies=      | -591.015860                 |
| Sum of electronic and thermal Enthalpies=    | -591.014916                 |
| Sum of electronic and thermal Free Energies= | -591.052223                 |

S\*\*2 before annihilation 2.0186, after 2.0002

---

**1-thiocyclohex-2-yne (23)**

---

Charge = 0 Multiplicity = 1

Redundant internal coordinates found in file. (old form).

C,0,1.8594064165,-0.3541182757,0.0909340401  
C,0,1.1311964918,0.9653220504,-0.3442837974  
C,0,-0.2310601008,1.2141540142,0.334832169  
H,0,2.6449443469,-0.5979692694,-0.6315477099  
H,0,2.3234012242,-0.253017585,1.0786436521  
H,0,0.9880432835,0.9395565664,-1.4307811845  
H,0,1.7838788149,1.8170880584,-0.1104666943  
H,0,-0.1183564197,1.1965058242,1.4243442207  
H,0,-0.6122304542,2.1970417717,0.0363856934  
C,0,0.739219274,-1.3164827438,0.1098570547  
C,0,-0.4802624113,-1.3205316649,-0.0331618782  
S,0,-1.5703675759,0.0120639335,-0.1166704459

|                                              |                             |
|----------------------------------------------|-----------------------------|
| Zero-point correction=                       | 0.095999 (Hartree/Particle) |
| Thermal correction to Energy=                | 0.101692                    |
| Thermal correction to Enthalpy=              | 0.102636                    |
| Thermal correction to Gibbs Free Energy=     | 0.066732                    |
| Sum of electronic and zero-point Energies=   | -591.085887                 |
| Sum of electronic and thermal Energies=      | -591.080195                 |
| Sum of electronic and thermal Enthalpies=    | -591.079250                 |
| Sum of electronic and thermal Free Energies= | -591.115155                 |

---

**TS from singlet 22 to 23 by C shift**

---

Charge = 0 Multiplicity = 1

Redundant internal coordinates found in file. (old form).

C,0,1.5601676551,0.3992718892,-0.0164985656  
C,0,0.4243569452,1.4095146186,-0.3041910491  
C,0,-0.8696868496,1.066222302,0.4327295556  
H,0,2.3068938842,0.4540710555,-0.8073033848  
H,0,2.0094313453,0.6142436023,0.9528523124  
H,0,0.2178071003,1.4391920135,-1.3790720315  
H,0,0.788609276,2.4004875659,-0.0006548627  
H,0,-0.726829527,1.0383396991,1.5170031162  
H,0,-1.6875720269,1.748275409,0.1851442505  
C,0,0.325825563,-1.0716508752,-0.0132914445  
C,0,1.5282052469,-1.3999470638,0.2224482994  
S,0,-1.3174646225,-0.6069717062,-0.1756227158

|                                              |                             |
|----------------------------------------------|-----------------------------|
| Zero-point correction=                       | 0.094012 (Hartree/Particle) |
| Thermal correction to Energy=                | 0.099574                    |
| Thermal correction to Enthalpy=              | 0.100518                    |
| Thermal correction to Gibbs Free Energy=     | 0.064545                    |
| Sum of electronic and zero-point Energies=   | -591.039678                 |
| Sum of electronic and thermal Energies=      | -591.034116                 |
| Sum of electronic and thermal Enthalpies=    | -591.033172                 |
| Sum of electronic and thermal Free Energies= | -591.069145                 |

\*\*\*\*\* 1 imaginary frequencies (negative Signs) \*\*\*\*\* -414.6751 cm<sup>-1</sup>

---

**TS from singlet 22 to 23 by S shift**

---

Charge = 0 Multiplicity = 1

Redundant internal coordinates found in file. (old form).

C,0,-1.4186615832,-0.7863679554,-0.4119410808  
C,0,-1.4801393075,0.5594041193,0.3541393512  
C,0,-0.2229671094,1.3845032048,0.0528402585  
H,0,-2.1813737317,-1.487603439,-0.0551778683  
H,0,-1.5422839993,-0.651949201,-1.4926664413  
H,0,-1.528624382,0.3353144624,1.4243673077  
H,0,-2.376531222,1.1278498328,0.0780754888  
H,0,-0.3272035101,1.8916129902,-0.9115060527  
H,0,-0.0654080101,2.1345824468,0.8322631296  
C,0,-0.0808305072,-1.2871990338,-0.0851414898  
C,0,0.9881651688,-1.3859726595,0.602264655  
S,0,1.3355727837,0.3696056423,-0.0937501077

Zero-point correction= 0.094156 (Hartree/Particle)  
Thermal correction to Energy= 0.099730  
Thermal correction to Enthalpy= 0.100674  
Thermal correction to Gibbs Free Energy= 0.064687  
Sum of electronic and zero-point Energies= -591.053041  
Sum of electronic and thermal Energies= -591.047467  
Sum of electronic and thermal Enthalpies= -591.046522  
Sum of electronic and thermal Free Energies= -591.082510

\*\*\*\*\* 1 imaginary frequencies (negative Signs) \*\*\*\*\* -335.0619 cm<sup>-1</sup>

---

**2-(1-azacyclohexylidene)carbene (singlet 24)**

---

Charge = 0 Multiplicity = 1

Redundant internal coordinates found in file. (old form).

C,0,1.4033315091,0.7224488409,-0.3620409507  
C,0,0.2271374668,1.5264255917,0.24305742  
C,0,0.1035787345,-1.4700642104,-0.1530756878  
C,0,1.423878464,-0.7368573755,0.1391232343  
H,0,0.412235155,1.7189706955,1.3096801094  
H,0,0.1095499459,2.4918113999,-0.2599355428  
H,0,1.2987390155,0.7242497984,-1.4554195014  
H,0,2.3555003527,1.2107718693,-0.1210033465  
H,0,0.1017943882,-2.4802448204,0.2716692917  
H,0,-0.0657829804,-1.5477390593,-1.2340919924  
H,0,1.5997441468,-0.747221044,1.2250803018  
H,0,2.2548221991,-1.280191256,-0.3286533102  
C,0,-0.9980511346,0.6992560375,0.0772394473  
C,0,-2.0880646558,0.2954512898,-0.5505116033  
N,0,-1.017358115,-0.7113595024,0.4117419719  
H,0,-1.3136434818,-0.9633182649,1.3459771686

Zero-point correction= 0.140811 (Hartree/Particle)  
Thermal correction to Energy= 0.147096  
Thermal correction to Enthalpy= 0.148041  
Thermal correction to Gibbs Free Energy= 0.111131  
Sum of electronic and zero-point Energies= -287.777400  
Sum of electronic and thermal Energies= -287.771115  
Sum of electronic and thermal Enthalpies= -287.770171  
Sum of electronic and thermal Free Energies= -287.807080

---

**2-(1-azacyclohexylidene)carbene (triplet 24)**

---

Charge = 0 Multiplicity = 3

Redundant internal coordinates found in file. (old form).

C,0,1.3969810609,0.6687589752,-0.4521531558  
C,0,0.2181198092,1.4288477969,0.1680522845  
C,0,0.2710154114,-1.5260943241,-0.0483388613  
C,0,1.5273922774,-0.700940024,0.2205178969  
H,0,0.47325331,1.7329092347,1.1936604754  
H,0,-0.0104744338,2.3466054955,-0.3825973475  
H,0,1.2282141775,0.5323333449,-1.529866837  
H,0,2.3199394045,1.2485411985,-0.3376240813  
H,0,0.2387991778,-2.419423891,0.5852740278  
H,0,0.2570021929,-1.8552042094,-1.097675618  
H,0,1.6566817721,-0.5683078781,1.3032230873  
H,0,2.3977252139,-1.2522885209,-0.1534305871  
C,0,-1.0561083751,0.6059037208,0.2462981116  
C,0,-2.3498233524,1.1822975366,0.3752665253  
N,0,-0.9378371296,-0.739398095,0.2142939877  
H,0,-1.8234695065,-1.2321503706,0.2539371015

Zero-point correction= 0.140437 (Hartree/Particle)  
Thermal correction to Energy= 0.146897  
Thermal correction to Enthalpy= 0.147841  
Thermal correction to Gibbs Free Energy= 0.109179  
Sum of electronic and zero-point Energies= -287.745860  
Sum of electronic and thermal Energies= -287.739400  
Sum of electronic and thermal Enthalpies= -287.738456  
Sum of electronic and thermal Free Energies= -287.777118

S\*\*2 before annihilation 2.0306, after 2.0004

---

**1-azacyclohepty-2-yne (25)**

---

Charge = 0 Multiplicity = 1

Redundant internal coordinates found in file. (old form).

C,0,1.2915230993,0.8907335546,0.2763404033  
C,0,1.8255145793,-0.53400888,-0.0521534529  
C,0,-1.3725925739,0.7972683642,0.2390396035  
C,0,-0.0494996458,1.2804340647,-0.414105542  
H,0,2.2719128181,-0.5546512655,-1.0548641065  
H,0,2.5997137661,-0.8302398608,0.6638401558  
H,0,1.1566369174,0.9671733547,1.3638817487  
H,0,2.0562666864,1.6278461422,-0.0049324311  
H,0,-2.1906011652,1.4544257695,-0.0791041171  
H,0,-1.2714782622,0.8753699723,1.3341801092  
H,0,-0.0411685355,0.9687804539,-1.4675220576  
H,0,-0.1000292096,2.3773139294,-0.4107362631  
C,0,0.6077317975,-1.3685592861,-0.0047776044  
C,0,-0.6102008925,-1.3541203873,-0.027771979  
N,0,-1.7436313166,-0.5855036982,-0.1594866952  
H,0,-2.5606096927,-0.9321017077,0.3283663682

Zero-point correction= 0.141086 (Hartree/Particle)  
Thermal correction to Energy= 0.147560  
Thermal correction to Enthalpy= 0.148504  
Thermal correction to Gibbs Free Energy= 0.111118

|                                              |             |
|----------------------------------------------|-------------|
| Sum of electronic and zero-point Energies=   | -287.804961 |
| Sum of electronic and thermal Energies=      | -287.798487 |
| Sum of electronic and thermal Enthalpies=    | -287.797543 |
| Sum of electronic and thermal Free Energies= | -287.834929 |

---

#### TS from singlet 24 to 25 by C shift

---

Charge = 0 Multiplicity = 1  
 Redundant internal coordinates found in file. (old form).  
 C,0,-0.2388214553,1.4572464174,0.2444258257  
 C,0,1.0660108041,0.9482295363,-0.3814434883  
 C,0,-1.3702276091,-0.8309993017,0.2891534286  
 C,0,-1.4840461792,0.6364686184,-0.1340452615  
 H,0,1.0076905253,0.8554684779,-1.4720967845  
 H,0,1.8752403552,1.6394889986,-0.1520219214  
 H,0,-0.1179969704,1.4707968237,1.3362098002  
 H,0,-0.3850976549,2.4975527935,-0.0771269184  
 H,0,-2.2379015619,-1.4088954151,-0.0456765647  
 H,0,-1.3114507916,-0.9086149643,1.3812768406  
 H,0,-1.633387837,0.6856820148,-1.2232397826  
 H,0,-2.3730921804,1.0779645658,0.3346580723  
 C,0,2.1036176185,-0.3821191179,0.477490873  
 C,0,0.9900611396,-0.8153701056,0.0349607349  
 N,0,-0.1636467631,-1.47797329,-0.2571402905  
 H,0,-0.2461593698,-1.7133100619,-1.2406826135

|                                              |                             |
|----------------------------------------------|-----------------------------|
| Zero-point correction=                       | 0.138755 (Hartree/Particle) |
| Thermal correction to Energy=                | 0.145017                    |
| Thermal correction to Enthalpy=              | 0.145961                    |
| Thermal correction to Gibbs Free Energy=     | 0.108956                    |
| Sum of electronic and zero-point Energies=   | -287.759661                 |
| Sum of electronic and thermal Energies=      | -287.753399                 |
| Sum of electronic and thermal Enthalpies=    | -287.752455                 |
| Sum of electronic and thermal Free Energies= | -287.789461                 |

\*\*\*\*\* 1 imaginary frequencies (negative Signs) \*\*\*\*\* -454.1150 cm<sup>-1</sup>

---

#### TS from singlet 24 to 25 by N shift

---

Charge = 0 Multiplicity = 1  
 Redundant internal coordinates found in file. (old form).  
 C,0,1.6158065382,-0.0123227889,-0.2924381996  
 C,0,1.0093334646,1.3046378092,0.2377371772  
 C,0,-0.6097023263,-1.3547060546,-0.2411660292  
 C,0,0.8617423206,-1.2507724782,0.2141710997  
 H,0,1.2227363664,1.4381206338,1.3063526069  
 H,0,1.4253111123,2.1701397568,-0.2941532463  
 H,0,1.5940043356,0.0050482997,-1.3895916712  
 H,0,2.6656623179,-0.0663491285,0.0203174723  
 H,0,-0.993495069,-2.3386144848,0.0619938465  
 H,0,-0.6690548182,-1.3011966651,-1.3348757364  
 H,0,0.893918063,-1.2754895642,1.3146891627  
 H,0,1.3859270064,-2.1500263953,-0.1366780721  
 C,0,-0.4356086409,1.2785003697,-0.0074237808  
 C,0,-1.6331058299,1.0773801456,-0.3935670453  
 N,0,-1.5685127871,-0.3764793255,0.2835774664  
 H,0,-1.5378165536,-0.3095537697,1.2974927292

Zero-point correction= 0.138158 (Hartree/Particle)  
 Thermal correction to Energy= 0.144470  
 Thermal correction to Enthalpy= 0.145414  
 Thermal correction to Gibbs Free Energy= 0.108282  
 Sum of electronic and zero-point Energies= -287.737442  
 Sum of electronic and thermal Energies= -287.731130  
 Sum of electronic and thermal Enthalpies= -287.730186  
 Sum of electronic and thermal Free Energies= -287.767318

\*\*\*\*\* 1 imaginary frequencies (negative Signs) \*\*\*\*\* -573.1773 cm<sup>-1</sup>

---

### 2-(1-oxacyclohexylidene)carbene (singlet 26)

---

Charge = 0 Multiplicity = 1  
 Redundant internal coordinates found in file. (old form).  
 C,0,-3.9123342998,-0.7139185043,-0.0153240386  
 C,0,-2.3748050775,-0.6870900375,-0.0139279882  
 C,0,-3.8555109137,1.5305137487,1.1242574852  
 C,0,-4.4380911397,0.1193006546,1.1625634113  
 H,0,-1.9843511581,-1.2295375097,0.8580462817  
 H,0,-1.9600938644,-1.1524177427,-0.9158289114  
 H,0,-4.280985151,-0.2925069412,-0.9604791232  
 H,0,-4.2708972189,-1.7480067578,0.0489655395  
 H,0,-4.13616947,2.1077240861,2.0086874868  
 H,0,-4.1963509407,2.0650148546,0.225531118  
 H,0,-4.1556675718,-0.3570442229,2.1108921103  
 H,0,-5.5329363514,0.1870445352,1.1362593549  
 C,0,-1.9190618604,0.7558778795,0.098079502  
 C,0,-1.046150861,1.2002781944,-0.8045553272  
 O,0,-2.4170856316,1.5117722628,1.1321447389

Zero-point correction= 0.127320 (Hartree/Particle)  
 Thermal correction to Energy= 0.133724  
 Thermal correction to Enthalpy= 0.134668  
 Thermal correction to Gibbs Free Energy= 0.097247  
 Sum of electronic and zero-point Energies= -307.622658  
 Sum of electronic and thermal Energies= -307.616254  
 Sum of electronic and thermal Enthalpies= -307.615310  
 Sum of electronic and thermal Free Energies= -307.652731

---

### 2-(1-oxacyclohexylidene)carbene (triplet 26)

---

Charge = 0 Multiplicity = 3  
 Redundant internal coordinates found in file. (old form).  
 C,0,-1.0545136538,1.1933411425,0.3077487989  
 C,0,0.4166254552,1.2857298794,-0.1086095515  
 C,0,-0.9042452151,-1.2758904683,0.1570177724  
 C,0,-1.657284928,-0.0535251367,-0.3395285965  
 H,0,0.4814001027,1.6042438827,-1.1605418244  
 H,0,0.9693788014,2.0308276452,0.4717626741  
 H,0,-1.1347292317,1.11453172,1.400694844  
 H,0,-1.5885794886,2.1003431323,0.0043507922  
 H,0,-1.1895254999,-2.1877255846,-0.3723176295  
 H,0,-1.0716348089,-1.4231370548,1.2312825598  
 H,0,-1.5822567281,0.0140676098,-1.4331281832

H,0,-2.7166549778,-0.1754002229,-0.0840565574  
C,0,1.180860647,-0.0223130928,-0.0203343651  
C,0,2.6026626573,-0.0617152936,0.0165514673  
O,0,0.5308736983,-1.1870971481,-0.0254241412

Zero-point correction= 0.127030 (Hartree/Particle)  
Thermal correction to Energy= 0.133457  
Thermal correction to Enthalpy= 0.134402  
Thermal correction to Gibbs Free Energy= 0.095603  
Sum of electronic and zero-point Energies= -307.578486  
Sum of electronic and thermal Energies= -307.572058  
Sum of electronic and thermal Enthalpies= -307.571114  
Sum of electronic and thermal Free Energies= -307.609913

S\*\*2 before annihilation 2.0168, after 2.0001

---

### 1-oxacyclohepty-2-yne (27)

---

Charge = 0 Multiplicity = 1  
Redundant internal coordinates found in file. (old form).  
C,0,1.2514793087,0.9308265301,0.2648978701  
C,0,1.8194000297,-0.4762397014,-0.0712300468  
C,0,-1.4081593931,0.7164126903,0.2501527597  
C,0,-0.115057715,1.2669397051,-0.4006260717  
H,0,2.203927882,-0.4992098764,-1.0989735193  
H,0,2.6472157523,-0.7292784556,0.5993637044  
H,0,1.1339210243,1.0061862715,1.35472127  
H,0,1.9821117433,1.6958912115,-0.031509393  
H,0,-2.2763760997,1.2825759431,-0.0970163655  
H,0,-1.3392030656,0.7808128001,1.3439554214  
H,0,-0.103444942,0.9859259031,-1.4627732139  
H,0,-0.2323570223,2.359196926,-0.3690003721  
C,0,0.638421292,-1.3657905046,0.0615805827  
C,0,-0.5710509146,-1.2966753006,-0.0510056153  
O,0,-1.72878353,-0.6707434821,-0.0875918306

Zero-point correction= 0.128342 (Hartree/Particle)  
Thermal correction to Energy= 0.134619  
Thermal correction to Enthalpy= 0.135563  
Thermal correction to Gibbs Free Energy= 0.098544  
Sum of electronic and zero-point Energies= -307.649062  
Sum of electronic and thermal Energies= -307.642785  
Sum of electronic and thermal Enthalpies= -307.641841  
Sum of electronic and thermal Free Energies= -307.678860

---

### TS from singlet 26 to 27 by C shift

---

Charge = 0 Multiplicity = 1  
Redundant internal coordinates found in file. (old form).  
C,0,-0.1547497352,1.4679648902,0.258389979  
C,0,1.1211475811,0.9004464777,-0.37344116  
C,0,-1.3695605488,-0.7838581022,0.252294464  
C,0,-1.4312757245,0.6927815757,-0.1166626701  
H,0,1.0429365278,0.7860953146,-1.4607493008  
H,0,1.965945402,1.5546962557,-0.1674310413



H,0,-0.0264786074,1.4800772253,1.3487925067  
H,0,-0.2683123433,2.5104252227,-0.0684015677  
H,0,-2.2384664563,-1.3332922768,-0.1149138092  
H,0,-1.2618049724,-0.9321857223,1.3332689171  
H,0,-1.6037956968,0.7733572918,-1.198380443  
H,0,-2.2994615054,1.1354993617,0.3880466364  
C,0,0.8918039765,-0.8841382145,0.0126890611  
C,0,1.9934767891,-0.4806908747,0.5026772045  
O,0,-0.2292102066,-1.4085328749,-0.4035534067

Zero-point correction= 0.126183 (Hartree/Particle)  
Thermal correction to Energy= 0.132234  
Thermal correction to Enthalpy= 0.133179  
Thermal correction to Gibbs Free Energy= 0.096537  
Sum of electronic and zero-point Energies= -307.603815  
Sum of electronic and thermal Energies= -307.597764  
Sum of electronic and thermal Enthalpies= -307.596820  
Sum of electronic and thermal Free Energies= -307.633461

\*\*\*\*\* 1 imaginary frequencies (negative Signs) \*\*\*\*\* -447.9128 cm<sup>-1</sup>

---

#### TS from singlet 26 to 27 by O shift

---

Charge = 0 Multiplicity = 1  
Redundant internal coordinates found in file. (old form).  
C,0,-1.574050062,0.2088997552,-0.3085158988  
C,0,-1.1653070554,-1.1771377065,0.2421633359  
C,0,0.8143971348,1.2327377434,-0.2118017339  
C,0,-0.6640706395,1.3451362273,0.1913086256  
H,0,-1.4140642257,-1.2899392424,1.3046948633  
H,0,-1.6735693018,-1.9838889343,-0.3038732433  
H,0,-1.5431996969,0.1704697916,-1.4048441244  
H,0,-2.6094817166,0.4132720019,-0.009588398  
H,0,1.3474478482,2.130356948,0.1232556806  
H,0,0.9216534436,1.141645206,-1.3009576647  
H,0,-0.7151179669,1.4056806738,1.2874114367  
H,0,-1.0454895806,2.2967517404,-0.2030278976  
C,0,0.2711747057,-1.341458039,0.0282133931  
C,0,1.4618393614,-1.152588429,-0.4238710356  
O,0,1.4933116617,0.1522823937,0.4328397812

Zero-point correction= 0.125273 (Hartree/Particle)  
Thermal correction to Energy= 0.131349  
Thermal correction to Enthalpy= 0.132293  
Thermal correction to Gibbs Free Energy= 0.095652  
Sum of electronic and zero-point Energies= -307.575802  
Sum of electronic and thermal Energies= -307.569726  
Sum of electronic and thermal Enthalpies= -307.568782  
Sum of electronic and thermal Free Energies= -307.605424

\*\*\*\*\* 1 imaginary frequencies (negative Signs) \*\*\*\*\* -556.8859 cm<sup>-1</sup>

---

**2-(1-thiocyclohexylidene)carbene (singlet 28)**

---

Charge = 0 Multiplicity = 1

Redundant internal coordinates found in file. (old form).

C,0,-3.8746723134,-0.7286634714,-0.0061654737  
C,0,-2.3344843595,-0.8534997017,-0.0269971336  
C,0,-3.9253799745,1.6100835631,1.1096337731  
C,0,-4.4131680852,0.1524782503,1.138481254  
H,0,-1.9788590952,-1.4134823264,0.8470627192  
H,0,-2.0054505711,-1.3806317208,-0.9295462891  
H,0,-4.1983036546,-0.3074362204,-0.9673844183  
H,0,-4.3165879582,-1.7294298377,0.0774445989  
H,0,-4.3711349242,2.1797125575,1.9325243624  
H,0,-4.1740899466,2.0996444103,0.1615932396  
H,0,-4.1361430914,-0.2937327455,2.1037299328  
H,0,-5.5103109792,0.1551424854,1.089843291  
C,0,-1.756387077,0.5199510838,-0.0157643545  
C,0,-1.3721111289,1.6034657499,-0.6427602977  
S,0,-2.113408371,1.6834024236,1.323616466

|                                              |                             |
|----------------------------------------------|-----------------------------|
| Zero-point correction=                       | 0.124554 (Hartree/Particle) |
| Thermal correction to Energy=                | 0.131258                    |
| Thermal correction to Enthalpy=              | 0.132202                    |
| Thermal correction to Gibbs Free Energy=     | 0.094023                    |
| Sum of electronic and zero-point Energies=   | -630.261177                 |
| Sum of electronic and thermal Energies=      | -630.254473                 |
| Sum of electronic and thermal Enthalpies=    | -630.253529                 |
| Sum of electronic and thermal Free Energies= | -630.291708                 |

---

**2-(1-thiocyclohexylidene)carbene (triplet 28)**

---

Charge = 0 Multiplicity = 3

Redundant internal coordinates found in file. (old form).

C,0,-1.209625,1.289597,0.347434  
C,0,0.22523,1.561212,-0.114829  
C,0,-1.162581,-1.226507,0.136227  
C,0,-1.800903,0.067724,-0.362055  
H,0,0.211539,1.881491,-1.1677  
H,0,0.670812,2.385467,0.453539  
H,0,-1.22963,1.125551,1.434383  
H,0,-1.820589,2.177027,0.144553  
H,0,-1.507707,-2.090606,-0.440128  
H,0,-1.417417,-1.393511,1.188751  
H,0,-1.65845,0.163134,-1.447069  
H,0,-2.880688,0.00371,-0.178297  
C,0,1.186655,0.388647,-0.023621  
C,0,2.588819,0.547967,-0.009949  
S,0,0.66666,-1.251506,0.010796

|                                            |                             |
|--------------------------------------------|-----------------------------|
| Zero-point correction=                     | 0.123678 (Hartree/Particle) |
| Thermal correction to Energy=              | 0.130586                    |
| Thermal correction to Enthalpy=            | 0.131530                    |
| Thermal correction to Gibbs Free Energy=   | 0.091357                    |
| Sum of electronic and zero-point Energies= | -630.197316                 |
| Sum of electronic and thermal Energies=    | -630.190409                 |

Sum of electronic and thermal Enthalpies= -630.189465  
Sum of electronic and thermal Free Energies= -630.229637

S\*\*2 before annihilation 2.0195, after 2.0002

---

### 1-thiocyclohepty-2-yne (29)

---

Charge = 0 Multiplicity = 1  
Redundant internal coordinates found in file. (old form).  
C,0,1.7632225548,0.6960860197,0.2470195805  
C,0,2.0029249253,-0.8112217125,-0.0484292338  
C,0,-0.8356599722,1.2181890942,0.296240628  
C,0,0.5221448172,1.3219840249,-0.4506014762  
H,0,2.400537015,-0.9405172664,-1.0632141143  
H,0,2.7301481095,-1.2309461237,0.654736042  
H,0,1.6622378742,0.8277758135,1.3325107207  
H,0,2.6592822745,1.251489706,-0.0600672258  
H,0,-1.4664453153,2.0727327393,0.0253230495  
H,0,-0.6660325369,1.2489862191,1.3782630515  
H,0,0.4203763183,0.9274573768,-1.4699848362  
H,0,0.7241719364,2.3965341871,-0.5512755553  
C,0,0.6643191969,-1.4112657453,0.054735886  
C,0,-0.5510502459,-1.3306399853,-0.0129710772  
S,0,-1.8785231218,-0.2562558073,-0.0720855194  
Zero-point correction= 0.125253 (Hartree/Particle)  
Thermal correction to Energy= 0.132092  
Thermal correction to Enthalpy= 0.133037  
Thermal correction to Gibbs Free Energy= 0.094365  
Sum of electronic and zero-point Energies= -630.286216  
Sum of electronic and thermal Energies= -630.279377  
Sum of electronic and thermal Enthalpies= -630.278433  
Sum of electronic and thermal Free Energies= -630.317104

---

### TS from singlet 28 to 29 by C shift

---

Charge = 0 Multiplicity = 1  
Redundant internal coordinates found in file. (old form).  
C,0,1.3888210046,1.0664397735,0.1324989131  
C,0,1.5955568594,-0.3242331872,-0.4674343128  
C,0,-1.1965602526,0.9763154322,0.4503976839  
C,0,0.0144634843,1.7097650526,-0.1363913244  
H,0,1.2624412206,-0.3961750835,-1.5081734906  
H,0,2.6470243328,-0.6079804723,-0.4421979591  
H,0,1.5747318402,1.0103701058,1.2129813723  
H,0,2.1545793635,1.731155628,-0.2913351536  
H,0,-2.1150794806,1.5312533095,0.2318113218  
H,0,-1.1073602965,0.8523018484,1.5341083032  
H,0,-0.1278496708,1.8113574259,-1.2210786825  
H,0,0.0232138025,2.7251008225,0.2830031031  
C,0,0.0950580296,-1.2777526193,0.1513241095  
C,0,1.1798912769,-1.7080989176,0.6561177309  
S,0,-1.429439234,-0.6772160184,-0.3024156948  
  
Zero-point correction= 0.122836 (Hartree/Particle)  
Thermal correction to Energy= 0.129413  
Thermal correction to Enthalpy= 0.130357  
Thermal correction to Gibbs Free Energy= 0.092222

Sum of electronic and zero-point Energies= -630.227525  
 Sum of electronic and thermal Energies= -630.220947  
 Sum of electronic and thermal Enthalpies= -630.220003  
 Sum of electronic and thermal Free Energies= -630.258138

\*\*\*\*\* 1 imaginary frequencies (negative Signs) \*\*\*\*\* -497.3868

---

**TS from singlet 28 to 29 by S shift**

---

Charge = 0 Multiplicity = 1  
 Redundant internal coordinates found in file. (old form).  
 C,0,1.8936792236,0.0403704014,0.214651533  
 C,0,1.2842460456,-1.2733704699,-0.3149446457  
 C,0,-0.3193728117,1.3925349494,0.3958433084  
 C,0,1.1000242022,1.292993515,-0.1905618045  
 H,0,1.3531098021,-1.3267838123,-1.4093935093  
 H,0,1.8128494848,-2.1437357176,0.0943767641  
 H,0,1.9538151379,-0.0157674463,1.309439752  
 H,0,2.9182246825,0.1272807319,-0.1676144115  
 H,0,-0.7181070803,2.3959907543,0.2031515402  
 H,0,-0.306493651,1.237112921,1.4806844965  
 H,0,1.0400479521,1.3536251424,-1.285872024  
 H,0,1.6626483709,2.1734472472,0.1493381091  
 C,0,-0.1219828276,-1.3682255373,0.0902783441  
 C,0,-1.2887307407,-1.3747585269,0.5814977964  
 S,0,-1.5683882003,0.2772397176,-0.3267935687

Zero-point correction= 0.123613 (Hartree/Particle)  
 Thermal correction to Energy= 0.130054  
 Thermal correction to Enthalpy= 0.130998  
 Thermal correction to Gibbs Free Energy= 0.093144  
 Sum of electronic and zero-point Energies= -630.245761  
 Sum of electronic and thermal Energies= -630.239320  
 Sum of electronic and thermal Enthalpies= -630.238376  
 Sum of electronic and thermal Free Energies= -630.276230

\*\*\*\*\* 1 imaginary frequencies (negative Signs) \*\*\*\*\* -380.7608 cm<sup>-1</sup>

## Summary output of (R/U)CCSD(T)/cc-pVTZ//CCSD/6-311+G\*\* calculations

---

### 2-(1-azacyclobutylidene)carbene (singlet 12)

---

1\1\GINC-NODE36\SP\RCCSD(T)-FC\CC-pVTZ\C4H5N1\RABLENP\01-Dec-2018\0\#  
n CCSD=(T,T1Diag)/cc-pVTZ geom=check guess=read\Betalactame carbene s  
inglet\0,1\C,0,1.3937124166,0.0406064948,0.2737463325\C,0,0.292780527  
3,1.0881630052,-0.0628756478\H,0,2.034105936,-0.1620721231,-0.59302403  
44\H,0,2.0025072284,0.2127454021,1.1649767558\H,0,0.450387434,1.718397  
6744,-0.937819743\H,0,-0.0143544242,1.6814063804,0.8013211735\C,0,-0.6  
029117571,-0.155732809,-0.2496112417\C,0,-1.7266047075,-0.21865819,-0.  
9495513973\N,0,0.3203078509,-0.97895688,0.46333425\H,0,0.4781837856,-1  
.9086020247,0.0889478827\Version=AM64L-G09RevD.01\State=1-A\HF=-208.7  
207585\MP2=-209.5328859\MP3=-209.567432\MP4D=-209.5877294\MP4DQ=-209.5  
653038\MP4SDQ=-209.5732405\CCSD=-209.573151\CCSD(T)=-209.6137782\RMSD=  
6.080e-09\PG=C01 [X(C4H5N1)]\@

T1 Diagnostic = 0.01522158

---

### 2-(1-azacyclobutylidene)carbene (triplet 12)

---

1\1\GINC-NODE33\SP\UCCSD(T)-FC\CC-pVTZ\C4H5N1(3)\RABLENP\01-Dec-2018\0  
\#n CCSD=(T,T1Diag)/cc-pVTZ geom=check guess=read\Betalactame carben  
e triplet\0,3\C,0,1.38854623,-0.15332019,0.\C,0,0.42738827,1.07528184  
,0.\H,0,2.00005505,-0.27724234,-0.89864571\H,0,2.00005505,-0.27724234,  
0.89864571\H,0,0.46622202,1.69811961,-0.89651124\H,0,0.46622202,1.6981  
1961,0.89651124\C,0,-0.71925931,0.03954787,0.\C,0,-2.12425373,0.043632  
59,0.\N,0,0.17407715,-0.98410361,0.\H,0,0.01434652,-1.98386784,0.\Ver  
sion=AM64L-G09RevD.01\State=3-A\HF=-208.7182236\MP2=-209.5043417\MP3=  
-209.5408934\MP4D=-209.5589596\MP4DQ=-209.5379799\PUHF=-208.7224653\PM  
P2-0=-209.507248\MP3-0=-209.542599\MP4SDQ=-209.5457588\CCSD=-209.5456  
819\CCSD(T)=-209.5841242\S2=2.030018\S2-1=2.010945\S2A=2.000412\RMSD=5  
.411e-09\PG=CS [SG(C4H1N1),X(H4)]\@

T1 Diagnostic = 0.01719886

---

### 1-azacyclopent-2-yne (13)

---

1\1\GINC-NODE07\SP\RCCSD(T)-FC\CC-pVTZ\C4H5N1\RABLENP\01-Dec-2018\0\#  
n CCSD=(T,T1Diag)/cc-pVTZ geom=check guess=read\N cyclopentyne single  
t\0,1\C,0,-0.9447322867,-0.1506947145,0.513951684\C,0,-0.5370065731,1  
.1440609554,-0.3157189949\H,0,-0.9877722642,0.1139391761,1.5764021693\  
H,0,-1.8958191614,-0.6134533154,0.2247811341\H,0,-0.9922946824,2.04781  
26811,0.0990309548\H,0,-0.8154650866,1.0607172342,-1.373384989\C,0,0.9  
876868244,1.0436719972,-0.0662414985\C,0,1.1605193465,-0.2181241116,-0  
.1472309173\N,0,0.2179492446,-1.088012823,0.3180309513\H,0,0.050732638  
9,-1.9024230795,-0.2578994839\Version=AM64L-G09RevD.01\State=1-A\HF=-  
208.6934329\MP2=-209.527362\MP3=-209.5535344\MP4D=-209.573862\MP4DQ=-2  
09.5493796\MP4SDQ=-209.5615047\CCSD=-209.5649732\CCSD(T)=-209.6128616\  
RMSD=6.421e-09\PG=C01 [X(C4H5N1)]\@

T1 Diagnostic = 0.04058311

---

**TS from singlet 12 to 13 by C shift**

---

1\1\GINC-NODE36\SP\RCCSD(T)-FC\CC-pVTZ\C4H5N1\RABLENP\03-Dec-2018\0\#\n CCSD=(T,T1Diag)/cc-pVTZ geom=check guess=read\TS to azacyclopentyne - C shift\0,1\C,0,-0.3784278518,1.0010202073,-0.1227232957\H,0,-0.72 61316528,1.4065224957,-1.0757384527\H,0,-0.405081323,1.774560257,0.647 3015565\C,0,1.1858946356,-1.2969652371,0.5167879221\C,0,-0.0331893635,-0.9385829448,0.4399307048\C,0,1.0542282008,0.3272021495,-0.2293817271 \H,0,1.3849929201,0.1936176478,-1.2591839859\H,0,1.7937115624,0.855949 5465,0.3670441104\N,0,-1.1942951461,-0.1782474839,0.3210804377\H,0,-1. 7838215216,-0.533196788,-0.4276128502\Version=AM64L-G09RevD.01\State= 1-A\HF=-208.6964659\MP2=-209.5358486\MP3=-209.5590118\MP4D=-209.579386 9\MP4DQ=-209.5545278\MP4SDQ=-209.5627502\CCSD=-209.5617014\CCSD(T)=-20 9.6063298\RMSD=4.011e-09\PG=C01 [X(C4H5N1)]\@

T1 Diagnostic = 0.01355023

---

**TS from singlet 12 to 13 by N shift**

---

1\1\GINC-NODE34\SP\RCCSD(T)-FC\CC-pVTZ\C4H5N1\RABLENP\02-Dec-2018\0\#\n CCSD=(T,T1Diag)/cc-pVTZ geom=check guess=read\TS to azacyclopentyne - N shift\0,1\C,0,0.825099146,-0.8461402598,0.182535972\C,0,1.111668 9998,0.6602908549,-0.0044425748\H,0,1.3162488159,-1.4451960331,-0.5874 76017\H,0,1.0885320947,-1.2309702009,1.1702032087\H,0,1.7939994135,0.8 922697779,-0.8242361771\H,0,1.4224485083,1.1772597597,0.9064067978\C,0 ,-1.5078461354,0.4325432952,0.0085650001\C,0,-0.3274485659,0.868109370 6,-0.3312921909\N,0,-0.7034235931,-0.9397959602,0.0164751238\H,0,-0.93 1860304,-1.4404908145,-0.8395982128\Version=AM64L-G09RevD.01\State=1- A\HF=-208.6750577\MP2=-209.5107471\MP3=-209.5355906\MP4D=-209.5568774\ MP4DQ=-209.531873\MP4SDQ=-209.5427651\CCSD=-209.5422021\CCSD(T)=-209.5 884597\RMSD=5.725e-09\PG=C01 [X(C4H5N1)]\@

T1 Diagnostic = 0.02213288

---

**2-(1-oxacyclobutylidene)carbene (singlet 14)**

---

1\1\GINC-NODE32\SP\RCCSD(T)-FC\CC-pVTZ\C4H4O1\RABLENP\02-Dec-2018\0\#\n CCSD=(T,T1Diag)/cc-pVTZ geom=check guess=read\Betalactone carbene s inglet\0,1\C,0,1.3283097628,-0.0468871138,0\C,0,0.2750462649,1.09158 32717,0\H,0,1.9419422524,-0.1239946237,-0.9005181713\H,0,1.9419422524 ,-0.1239946237,0.9005181713\H,0,0.2499920311,1.7089006226,-0.898934846 8\H,0,0.2499920311,1.7089006226,0.8989348468\C,0,-0.6972815838,-0.0938 073457,0\C,0,-2.0305214287,-0.064657345,0\O,0,0.2818935027,-1.064747 908,0\Version=AM64L-G09RevD.01\State=1-A\HF=-228.5510005\MP2=-229.3 837357\MP3=-229.4133888\MP4D=-229.4340985\MP4DQ=-229.4119337\MP4SDQ=-2 29.4212221\CCSD=-229.4206681\CCSD(T)=-229.4612424\RMSD=8.732e-09\PG=CS [SG(C4O1),X(H4)]\@

T1 Diagnostic = 0.01558942

---

**2-(1-oxacyclobutylidene)carbene (triplet 14)**

---

1\1\GINC-NODE04\SP\UCCSD(T)-FC\CC-pVTZ\C4H4O1(3)\RABLENP\01-Dec-2018\0  
\\#n CCSD=(T,T1Diag)/cc-pVTZ geom=check guess=read\\Betalactone carben  
e triplet\\0,3\C,0,0.1770749634,1.3419847222,0.\C,0,-1.0679631163,0.43  
39880481,0.\H,0,0.3562640831,1.9293207444,-0.901935317\H,0,0.356264083  
1,1.9293207444,0.901935317\H,0,-1.6915920427,0.4701742658,-0.896272056  
2\H,0,-1.6915920427,0.4701742658,0.8962720562\C,0,-0.0313915242,-0.683  
7659081,0.\C,0,-0.010192172,-2.0893701414,0.\O,0,1.0344443295,0.149433  
4014,0.\\Version=AM64L-G09RevD.01\State=3-A\HF=-228.544079\MP2=-229.3  
505711\MP3=-229.3813775\MP4D=-229.4003432\MP4DQ=-229.3799459\PUHF=-228  
.5472631\PMP2-0=-229.3525807\PMP3-0=-229.3824852\MP4SDQ=-229.3896738\C  
CSD=-229.3890512\CCSD(T)=-229.4276063\S2=2.017495\S2-1=2.004524\S2A=2.  
000131\RMSD=4.069e-09\PG=CS [SG(C4O1),X(H4)]\\@

T1 Diagnostic = 0.01995477

---

**1-oxacyclopent-2-yne (15)**

---

1\1\GINC-NODE04\SP\RCCSD(T)-FC\CC-pVTZ\C4H4O1\RABLENP\01-Dec-2018\0\\#  
n CCSD=(T,T1Diag)/cc-pVTZ geom=check guess=read\\Oxo cyclopentyne sing  
let\\0,1\C,0,0.9907719822,-0.2197163,-0.1706516289\C,0,0.3907691947,1.  
2169820125,0.0981057073\H,0,1.0702923596,-0.3882247857,-1.250165951\H,  
0,1.9387027147,-0.4468882202,0.3243382722\H,0,0.7837301917,1.948519581  
8,-0.6130110082\H,0,0.5887263074,1.5634824668,1.1181523001\C,0,-1.0836  
824791,0.8330462212,-0.129976167\C,0,-1.1031455041,-0.3570820151,0.278  
279497\O,0,-0.0352267671,-1.1585329715,0.3447949785\\Version=AM64L-G09  
RevD.01\State=1-A\HF=-228.5014783\MP2=-229.370139\MP3=-229.38636\MP4D=  
-229.4088019\MP4DQ=-229.3832196\MP4SDQ=-229.3975008\CCSD=-229.4010843\  
CCSD(T)=-229.4523007\RMSD=1.611e-09\PG=C01 [X(C4H4O1)]\\@

T1 Diagnostic = 0.04638607

---

**TS from singlet 14 to 15 by C shift**

---

1\1\GINC-NODE33\SP\RCCSD(T)-FC\CC-pVTZ\C4H4O1\RABLENP\05-Dec-2018\0\\#  
n CCSD=(T,T1Diag)/cc-pVTZ geom=check guess=read\\TS to oxacyclopentyne  
- C shift\\0,1\C,0,0.9398406871,0.6232635029,-0.0650607193\C,0,-0.583  
6017453,1.0264361151,0.0526490858\H,0,1.5291244717,1.175942762,-0.7995  
144154\H,0,1.4224205782,0.6273726546,0.9165391661\H,0,-0.9836996315,1.  
4210372786,-0.8851800368\H,0,-0.731009857,1.7596148124,0.8492195696\C,  
0,-0.3685108587,-0.9629793107,-0.118179429\C,0,-1.3026017135,-0.353555  
8238,0.4683745102\O,0,0.879262069,-0.8006819913,-0.5135747311\\Version  
=AM64L-G09RevD.01\State=1-A\HF=-228.5131555\MP2=-229.3753546\MP3=-229.  
3917733\MP4D=-229.4127576\MP4DQ=-229.3882734\MP4SDQ=-229.4001234\CCSD=  
-229.400336\CCSD(T)=-229.4466849\RMSD=3.191e-09\PG=C01 [X(C4H4O1)]\\@

T1 Diagnostic = 0.02974928

---

**TS from singlet 14 to 15 by O shift**

---

1\1\GINC-NODE32\SP\IRCCSD(T)-FC\CC-pVTZ\C4H4O1\RABLENP\02-Dec-2018\0\#\n CCSD=(T,T1Diag)/cc-pVTZ geom=check guess=read\TS to oxacyclopentyne - O shift\0,1\C,0,0.9691446982,0.5944855923,-0.0184395849\C,0,0.9559735357,-0.9509303426,0.0621235806\H,0,1.5832177374,1.0721015295,0.7455947962\H,0,1.2328557496,0.9585647171,-1.0159430851\H,0,1.4272157068,-1.3566120159,0.9593024202\H,0,1.3336877248,-1.4539919543,-0.8315290932\C,0,-1.4055571701,-0.0499503824,-0.3613930736\C,0,-0.5320157554,-0.9093200942,0.1386605726\O,0,-0.4380267871,0.9722371004,0.258375547\Version=AM64L-G09RevD.01\State=1-A\HF=-228.489031\MP2=-229.3408599\MP3=-229.3613638\MP4D=-229.383646\MP4DQ=-229.359393\MP4SDQ=-229.3731377\CCSD=-229.3713595\CCSD(T)=-229.4178277\RMSD=8.315e-09\PG=C01 [X(C4H4O1)]\@\

T1 Diagnostic = 0.02495660

---

**2-(1-thiocyclobutylidene)carbene (singlet 16)**

---

1\1\GINC-NODE32\SP\IRCCSD(T)-FC\CC-pVTZ\C4H4S1\RABLENP\01-Dec-2018\0\#\n CCSD=(T,T1Diag)/cc-pVTZ geom=check guess=read\Betalactone sulfur carbene singlet\0,1\C,0,0.9595252334,2.7880362551,0.0648817568\C,0,-0.5837070488,2.7934566287,-0.081405909\H,0,1.5020252576,3.397159566,-0.6590884701\H,0,1.2888013291,3.0128816887,1.0808566085\H,0,-0.8976817404,3.1591899821,-1.0629672678\H,0,-1.1287129737,3.3210161753,0.7047112396\C,0,-0.7025983106,1.2635187042,-0.0213233754\C,0,-1.7349352316,0.4899125648,0.25095016\S,0,1.046071255,0.9712876751,-0.2741208426\Version=AM64L-G09RevD.01\State=1-A\HF=-551.2362306\MP2=-552.0129835\MP3=-552.0551843\MP4D=-552.0766765\MP4DQ=-552.0525517\MP4SDQ=-552.0601951\CCSD=-552.0596985\CCSD(T)=-552.1020364\RMSD=5.861e-09\PG=C01 [X(C4H4S1)]\@\

T1 Diagnostic = 0.01554885

---

**2-(1-thiocyclobutylidene)carbene (triplet 16)**

---

1\1\GINC-NODE34\SP\UCCSD(T)-FC\CC-pVTZ\C4H4S1(3)\RABLENP\01-Dec-2018\0\#\n CCSD=(T,T1Diag)/cc-pVTZ geom=check guess=read\Beta thiolactone carbene triplet\0,3\C,0,1.3386360556,0.5672826178,0.\C,0,0.0035385106,1.3546411344,0.\H,0,1.9481571912,0.6941890035,-0.8959817532\H,0,1.9481571912,0.6941890035,0.8959817532\H,0,-0.1518905683,1.973495116,-0.8898900497\H,0,-0.1518905683,1.973495116,0.8898900497\C,0,-0.8794451021,0.1075815319,0.\C,0,-2.2543676151,-0.1211913945,0.\S,0,0.440197026,-1.0423992815,0.\Version=AM64L-G09RevD.01\State=3-A\HF=-551.2137483\MP2=-551.9646636\MP3=-552.0094059\MP4D=-552.0287791\MP4DQ=-552.0060668\PUHF=-551.2172622\MP2-0=-551.9668787\MP3-0=-552.0106356\MP4SDQ=-552.014406\CCSD=-552.0152369\CCSD(T)=-552.0563242\S2=2.021509\S2-1=2.005495\S2A=2.000231\RMSD=4.083e-09\PG=CS [SG(C4S1),X(H4)]\@\

T1 Diagnostic = 0.02517095



---

**1-thiocyclopent-2-yne (17)**

---

1\1\GINC-NODE33\SP\RCSSD(T)-FC\CC-pVTZ\C4H4S1\RABLENP\02-Dec-2018\0\#  
n CCSD=(T,T1Diag)/cc-pVTZ geom=check guess=read\\sulfur cyclopentyne\\  
0,1\C,0,0.980166349,0.3538762475,0.1089205317\C,0,0.0257257284,1.57481  
77276,-0.1380438279\H,0,1.8784630989,0.3632642921,-0.5164640743\H,0,1.  
2742859015,0.3431434615,1.1628371333\H,0,-0.0132501712,1.8515230742,-1  
.1979564886\H,0,0.342650932,2.4382161866,0.451905657\C,0,-1.2601090602  
,0.9296784626,0.2929669461\C,0,-1.4883474131,-0.2778868422,0.112912030  
9\S,0,-0.0364273553,-1.1977216097,-0.2089189183\\Version=AM64L-G09RevD  
.01\State=1-A\HF=-551.2123594\MP2=-552.0302551\MP3=-552.0554605\MP4D=-  
552.0792623\MP4DQ=-552.0514011\MP4SDQ=-552.0628577\CCSD=-552.0635094\C  
CSD(T)=-552.1135715\RMSD=3.764e-09\PG=C01 [X(C4H4S1)]\@

T1 Diagnostic = 0.03103232

---

**TS from singlet 16 to 17 by C shift**

---

1\1\GINC-NODE07\SP\RCSSD(T)-FC\CC-pVTZ\C4H4S1\RABLENP\02-Dec-2018\0\#  
n CCSD=(T,T1Diag)/cc-pVTZ geom=check guess=read\\TS to thiocyclopentyn  
e - C shift\\0,1\C,0,0.2358255915,1.1987191627,0.1559328055\C,0,-1.212  
7201294,0.6887642353,-0.1756889493\H,0,0.5487820655,2.0136888347,-0.49  
96494396\H,0,0.3084327202,1.4992874479,1.2030612437\H,0,-1.4524911687,  
0.8323168261,-1.2299475975\H,0,-1.9366477723,1.1872581863,0.4675216991  
\C,0,-0.3399994159,-0.9618544725,0.087775201\C,0,-1.6067212447,-0.9639  
109401,0.1464388004\S,0,1.2607572637,-0.3163764404,-0.1058588834\\Vers  
ion=AM64L-G09RevD.01\State=1-A\HF=-551.2019852\MP2=-552.007495\MP3=-55  
2.0367188\MP4D=-552.0587304\MP4DQ=-552.0322776\MP4SDQ=-552.0411092\CCS  
D=-552.0399975\CCSD(T)=-552.0868824\RMSD=7.169e-09\PG=C01 [X(C4H4S1)]\  
\@

T1 Diagnostic = 0.01822438

---

**TS from singlet 16 to 17 by S shift**

---

1\1\GINC-NODE04\SP\RCSSD(T)-FC\CC-pVTZ\C4H4S1\RABLENP\02-Dec-2018\0\#  
n CCSD=(T,T1Diag)/cc-pVTZ geom=check guess=read\\TS to thiocyclopentyn  
e - S shift\\0,1\C,0,1.0487358686,-0.7083242239,0.3330797552\C,0,1.316  
6898037,0.7117182621,-0.2107393658\H,0,1.6208640362,-1.5036036973,-0.1  
482847516\H,0,1.1517001371,-0.7512081862,1.4196069082\H,0,1.6761129817  
,0.6904639671,-1.2440852899\H,0,1.9666544907,1.3400741274,0.4032436428  
\C,0,-0.119265212,1.1133959028,-0.1410529492\C,0,-1.3104350431,1.10199  
33282,0.3401104611\S,0,-0.7591381729,-0.8205566002,-0.1401780207\\Vers  
ion=AM64L-G09RevD.01\State=1-A\HF=-551.2182481\MP2=-552.0213944\MP3=-5  
52.0525527\MP4D=-552.074631\MP4DQ=-552.0476864\MP4SDQ=-552.0562721\CCS  
D=-552.0550178\CCSD(T)=-552.1018299\RMSD=7.735e-09\PG=C01 [X(C4H4S1)]\  
\@

T1 Diagnostic = 0.01629645

---

**2-(1-azacyclopentylidene)carbene (singlet 18)**

---

1\1\GINC-N18\SP\RCCSD(T)-FC\CC-pVTZ\C5H7N1\DMTHAMAT\03-Dec-2018\0\# r  
ccsd=(t,t1diag)/cc-pvtz geom=connectivity\gammalactamcarbene singlet\  
\0,1\C,0,0.173096,1.204091,0.159495\C,0,-1.250002,0.755473,-0.23831\C,  
0,-1.280601,-0.707376,0.209934\H,0,0.555881,2.026784,-0.448282\H,0,0.1  
98657,1.502519,1.213315\H,0,-1.374803,0.808717,-1.325002\H,0,-2.022948  
,1.363893,0.240708\H,0,-1.428514,-0.770755,1.299946\H,0,-2.055204,-1.2  
98109,-0.288394\C,0,0.965471,-0.105447,-0.024109\C,0,2.292207,-0.04156  
4,-0.018749\N,0,0.053439,-1.173375,-0.203592\H,0,0.351832,-2.05048,0.2  
03287\Version=ES64L-G16RevA.03\State=1-A\HF=-247.8061211\MP2=-248.793  
659\MP3=-248.8366752\MP4D=-248.8604406\MP4DQ=-248.8339158\MP4SDQ=-248.  
8428884\CCSD=-248.8424935\CCSD(T)=-248.8906003\RMSD=6.273e-09\PG=C01 [X(C5H7N1)]\@

T1 Diagnostic = 0.01402090

---

**2-(1-azacyclopentylidene)carbene (triplet 18)**

---

1\1\GINC-N12\SP\UCCSD(T)-FC\CC-pVTZ\C5H7N1(3)\DMTHAMAT\05-Dec-201  
8\0\# uccsd=(t,t1diag)/cc-pvtz geom=connectivity\gammalactamcarbene  
triplet\0,3\C,0,0.038086,1.221934,0.169264\C,0,-1.3477,0.668843,-0.22  
4036\C,0,-1.249551,-0.82855,0.125256\H,0,0.365746,2.068405,-0.43835\H,  
0,0.063133,1.532532,1.222454\H,0,-1.497963,0.779989,-1.303654\H,0,-2.1  
75237,1.160538,0.294633\H,0,-1.553906,-1.028262,1.161838\H,0,-1.830352  
, -1.471673,-0.542659\C,0,0.967026,0.02433,0.001701\C,0,2.381175,-0.005  
962,-0.087891\N,0,0.184855,-1.075417,-0.033729\H,0,0.600382,-1.997181,  
-0.063926\Version=ES64L-G16RevA.03\State=3-A\HF=-247.8041181\MP2=-248  
.7645129\MP3=-248.8102394\MP4D=-248.8317717\MP4DQ=-248.8066845\PUHF=-2  
47.8082789\PMP2-0=-248.7673608\PMP3-0=-248.8119144\MP4SDQ=-248.8153865  
\CCSD=-248.8150407\CCSD(T)=-248.8607706\S2=2.029305\S2-1=2.010649\S2A=  
2.000387\RMSD=3.893e-09\PG=C01 [X(C5H7N1)]\@

T1 Diagnostic = 0.01531155

---

**1-azacyclohex-2-yne (19)**

---

1\1\GINC-N2\SP\RCCSD(T)-FC\CC-pVTZ\C5H7N1\DMTHAMAT\04-Dec-2018\0\  
\# rccsd=(t,t1diag)/cc-pvtz geom=connectivity\azacyclohexyne\0,1\C,0  
,1.583742,-0.158556,0.141739\C,0,0.672217,1.046617,-0.288542\C,0,-0.76  
8427,0.998937,0.270462\H,0,2.454552,-0.226417,-0.518482\H,0,1.945162,-  
0.046153,1.170464\H,0,0.616008,1.061254,-1.38367\H,0,1.130761,1.989842  
,0.037529\H,0,-0.724702,1.006168,1.370738\H,0,-1.317402,1.885412,-0.06  
6359\C,0,0.614711,-1.286285,0.013748\C,0,-0.612265,-1.24722,-0.038484\  
N,0,-1.520768,-0.209601,-0.21216\H,0,-2.398865,-0.323856,0.28136\Vers  
ion=ES64L-G16RevA.03\State=1-A\HF=-247.7861981\MP2=-248.8226992\MP3=-2  
48.8463158\MP4D=-248.873179\MP4DQ=-248.8420903\MP4SDQ=-248.8526251\CCS  
D=-248.8517617\CCSD(T)=-248.9065383\RMSD=6.317e-09\PG=C01 [X(C5H7N1)]\  
\@

T1 Diagnostic = 0.01496655

---

**TS from singlet 18 to 19 by C shift**

---

1\1\GINC-NSCC-N12\SP\RCCSD(T)-FC\CC-pVTZ\C5H7N1\DMTHAMAT\04-Dec-2018\0  
\\# rccsd=(t,t1diag)/cc-pvtz geom=connectivity\\TS to azacyclohexyne-C  
shift\\0,1\C,0,0.788928,0.906679,0.432259\C,0,-0.580017,1.185314,-0.2  
07116\C,0,-1.462018,-0.086201,-0.119988\H,0,1.506563,1.682841,0.173712  
\H,0,0.751377,0.805285,1.521337\H,0,-0.416535,1.455031,-1.255632\H,0,-  
1.064503,2.035733,0.288675\H,0,-2.1711,-0.034971,0.712927\H,0,-2.02748  
9,-0.237892,-1.043839\C,0,0.725351,-0.835929,-0.065228\C,0,1.865547,-0  
.3817,-0.407928\N,0,-0.557297,-1.250499,0.113168\H,0,-0.703974,-1.6815  
13,1.018655\\Version=ES64L-G16RevA.03\State=1-A\HF=-247.7746128\MP2=-2  
48.7907949\MP3=-248.8221423\MP4D=-248.8463955\MP4DQ=-248.8171262\MP4SD  
Q=-248.8262564\CCSD=-248.8248819\CCSD(T)=-248.8773486\RMSD=8.227e-09\PG  
G=C01 [X(C5H7N1)]\\@

T1 Diagnostic = 0.01203218

---

**TS from singlet 18 to 19 by N shift**

---

1\1\GINC-NSCC-N2\SP\RCCSD(T)-FC\CC-pVTZ\C5H7N1\DMTHAMAT\04-Dec-2018\0\0  
\\# rccsd=(t,t1diag)/cc-pvtz geom=connectivity\\TS to azacyclohexyne-N  
shift\\0,1\C,0,-0.103712,1.228714,-0.329841\C,0,-1.326008,0.462252,0.1  
88315\H,0,-0.04121,1.154183,-1.421615\H,0,-0.159195,2.291336,-0.06185\H,  
0,-1.429437,0.635165,1.266695\H,0,-2.260046,0.76733,-0.2991\C,0,0.41  
3617,-1.108886,0.038993\C,0,1.638248,-0.794573,-0.160831\N,0,1.168284,  
0.718699,0.211948\H,0,1.205972,0.823956,1.223278\C,0,-1.048702,-1.0636  
46,-0.046104\H,0,-1.384197,-1.370087,-1.043216\H,0,-1.550533,-1.675934  
,0.708982\\Version=ES64L-G16RevA.03\State=1-A\HF=-247.7510484\MP2=-248  
.7657994\MP3=-248.7978243\MP4D=-248.8228529\MP4DQ=-248.7932898\MP4SDQ=  
-248.8050492\CCSD=-248.8040477\CCSD(T)=-248.857917\RMSD=8.940e-09\PG=C  
01 [X(C5H7N1)]\\@

T1 Diagnostic = 0.01928363

---

**2-(1-oxacyclopentylidene)carbene (singlet 20)**

---

1\1\GINC-N19\SP\RCCSD(T)-FC\CC-pVTZ\C5H6O1\DMTHAMAT\03-Dec-2018\0\\# r  
ccsd=(t,t1diag)/cc-pvtz geom=connectivity\\gammalactonecarbene singlet  
\\0,1\C,0,0.168268,1.18194,0.232536\C,0,-1.214854,0.750549,-0.292513\C  
,0,-1.261948,-0.713239,0.141139\H,0,0.599468,2.03197,-0.300029\H,0,0.1  
22581,1.414936,1.302729\H,0,-1.245772,0.822014,-1.384894\H,0,-2.031029  
,1.343133,0.131399\H,0,-1.541634,-0.81033,1.19814\H,0,-1.910371,-1.345  
559,-0.469076\O,0,0.087579,-1.195324,-0.030201\C,0,0.934569,-0.124111,  
0.016387\C,0,2.25832,-0.077401,-0.136992\\Version=ES64L-G16RevA.03\Sta  
te=1-A\HF=-267.6359562\MP2=-268.6438104\MP3=-268.6818841\MP4D=-268.705  
9356\MP4DQ=-268.6796716\MP4SDQ=-268.6898956\CCSD=-268.6890936\CCSD(T)=  
-268.7371961\RMSD=5.459e-09\PG=C01 [X(C5H6O1)]\\@

T1 Diagnostic = 0.01422591

---

**2-(1-oxacyclopentylidene)carbene (triplet 20)**

---

1\1\GINC-NSCC-N13\SP\UCCSD(T)-FC\CC-pVTZ\C5H6O1(3)\DMTHAMAT\04-Dec-2018\0\#\ uccsd=(t,t1diag)/cc-pvtz geom=connectivity\lactonecarbene triplet\0,3\C,0,0.03278,1.202932,0.185456\C,0,-1.335948,0.653985,-0.245896\C,0,-1.200677,-0.820929,0.134741\H,0,0.389217,2.057756,-0.39293\H,0,0.037963,1.485493,1.247565\H,0,-1.461649,0.753145,-1.329476\H,0,-2.180873,1.13491,0.254093\H,0,-1.443403,-1.002231,1.188061\H,0,-1.756288,-1.515856,-0.496805\O,0,0.209338,-1.118397,-0.042196\C,0,0.94001,-0.000303,0.00531\C,0,2.353889,-0.030025,-0.101767\Version=ES64L-G16RevA.03\State=3-A\HF=-267.6248754\MP2=-268.604052\MP3=-268.6445812\MP4D=-268.6667765\MP4DQ=-268.6423345\PUHF=-267.6280224\PM2=-268.6060358\PM3=-268.6456782\MP4SDQ=-268.652725\CCSD=-268.6518537\CCSD(T)=-268.6975285\S2=2.017209\S2-1=2.004428\S2A=2.000119\RMSD=3.945e-09\PG=C01 [X(C5H6O1)]\@

T1 Diagnostic = 0.01699090

---

**1-oxacyclohex-2-yne (21)**

---

1\1\GINC-NSCC-N14\SP\RCCSD(T)-FC\CC-pVTZ\C5H6O1\DMTHAMAT\04-Dec-2018\0\#\ rccsd=(t,t1diag)/cc-pvtz geom=connectivity\oxacyclohexyne\0,1\C,0,1.571644,-0.084035,0.093794\C,0,0.588032,1.075713,-0.283265\C,0,-0.834015,0.927324,0.302777\H,0,2.375667,-0.151954,-0.645643\H,0,2.033357,0.070611,1.075485\H,0,0.50302,1.124799,-1.375639\H,0,0.980344,2.040755,0.065148\H,0,-0.800545,0.884788,1.397947\H,0,-1.479142,1.74637,-0.023009\O,0,-1.522269,-0.297165,-0.155114\C,0,0.654192,-1.276652,0.115783\C,0,-0.55228,-1.19869,-0.104652\Version=ES64L-G16RevA.03\State=1-A\HF=-267.6080603\MP2=-268.6666572\MP3=-268.6845522\MP4D=-268.7117029\MP4DQ=-268.6807904\MP4SDQ=-268.6930873\CCSD=-268.6918002\CCSD(T)=-268.7471603\RMSD=7.748e-09\PG=C01 [X(C5H6O1)]\@

T1 Diagnostic = 0.01669211

---

**TS from singlet 20 to 21 by C shift**

---

1\1\GINC-NSCC-N15\SP\RCCSD(T)-FC\CC-pVTZ\C5H6O1\DMTHAMAT\04-Dec-2018\0\#\ rccsd=(t,t1diag)/cc-pvtz geom=connectivity\TS to oxacyclohexyne-C shift\0,1\C,0,0.79944281,1.0440257,0.03491674\C,0,-0.73356614,1.0990679,-0.20790863\C,0,-1.36365021,-0.18217445,0.32906949\H,0,1.32435538,1.59506127,-0.74299778\H,0,1.04071882,1.44093755,1.02018811\H,0,-0.9395743,1.15977214,-1.28144101\H,0,-1.14975919,1.98762038,0.28015135\H,0,-1.30076842,-0.25151801,1.42133717\H,0,-2.38522806,-0.3632969,-0.00779018\O,0,-0.53773051,-1.22733236,-0.2543009\C,0,0.69668716,-0.81332067,-0.08627762\C,0,1.88643635,-0.43925141,0.15435994\Version=ES64L-G16RevA.03\State=1-A\HF=-267.6003303\MP2=-268.639\MP3=-268.6638234\MP4D=-268.6884374\MP4DQ=-268.6593022\MP4SDQ=-268.670117\CCSD=-268.6681768\CCSD(T)=-268.7210876\RMSD=3.356e-09\PG=C01 [X(C5H6O1)]\@

T1 Diagnostic = 0.01335026

---

**TS from singlet 20 to 21 by O shift**

---

1\1\GINC-N18\SP\RCCSD(T)-FC\CC-pVTZ\C5H6O1\DMTHAMAT\04-Dec-2018\0\# r  
ccsd=(t,t1diag)/cc-pvtz geom=connectivity\TS to oxacyclohexyne-O shif  
t\0,1\C,0,-1.161098,-0.941933,0.028972\C,0,-1.227967,0.628735,-0.1104  
72\C,0,0.122841,1.214782,0.297728\H,0,-1.495983,-1.250379,1.026033\H,0  
,-1.771316,-1.433459,-0.732931\H,0,-2.053232,1.023523,0.493006\H,0,-1.  
413164,0.869454,-1.162028\H,0,0.208874,2.263948,-0.004378\H,0,0.288869  
,1.129791,1.37952\O,0,1.160501,0.528906,-0.410911\C,0,0.277091,-1.1794  
05,-0.100387\C,0,1.481123,-0.861199,0.265504\Version=ES64L-G16RevA.03  
\State=1-A\HF=-267.5677289\MP2=-268.5998651\MP3=-268.6279097\MP4D=-268  
.6537461\MP4DQ=-268.6246536\MP4SDQ=-268.639045\CCSD=-268.6370383\CCSD(  
T)=-268.6912256\RMSD=8.132e-09\PG=C01 [X(C5H6O1)]\@

T1 Diagnostic = 0.02161052

---

**2-(1-thiocyclopentylidene)carbene (singlet 22)**

---

1\1\GINC-N19\SP\RCCSD(T)-FC\CC-pVTZ\C5H6S1\DMTHAMAT\04-Dec-2018\0\# r  
ccsd=(t,t1diag)/cc-pvtz geom=connectivity\gamma thiolactonecarbene si  
nglet\0,1\C,0,0.298446,1.384122,0.306377\C,0,-1.07375,1.152408,-0.342  
592\C,0,-1.528325,-0.237021,0.109196\H,0,0.819267,2.253195,-0.105585\H  
,0,0.19246,1.516915,1.390221\H,0,-0.970414,1.173601,-1.433232\H,0,-1.7  
92856,1.923814,-0.042457\H,0,-1.89102,-0.215622,1.141207\H,0,-2.304433  
, -0.65391,-0.537447\C,0,1.055993,0.07903,0.039487\C,0,2.353489,0.1346,  
-0.193329\S,0,-0.043007,-1.317301,0.004528\Version=ES64L-G16RevA.03\S  
tate=1-A\HF=-590.3145482\MP2=-591.2690799\MP3=-591.3186029\MP4D=-591.3  
436741\MP4DQ=-591.3153051\MP4SDQ=-591.3240305\CCSD=-591.3231247\CCSD(T  
)=-591.3732852\RMSD=3.045e-09\PG=C01 [X(C5H6S1)]\@

T1 Diagnostic = 0.01405002

---

**2-(1-thiocyclopentylidene)carbene (triplet 22)**

---

1\1\GINC-N19\SP\UCCSD(T)-FC\CC-pVTZ\C5H6S1(3)\DMTHAMAT\04-Dec-2018\0\#  
# uccsd=(t,t1diag)/cc-pvtz geom=connectivity\gamma thiolactonecarbene  
triplet\0,3\C,0,0.028343,1.429002,0.213569\C,0,-1.32816,0.937634,-0.  
307115\C,0,-1.472312,-0.512591,0.172153\H,0,0.393141,2.319157,-0.30640  
1\H,0,-0.031377,1.667427,1.285911\H,0,-1.32716,0.957843,-1.403409\H,0,  
-2.160661,1.554035,0.049498\H,0,-1.744928,-0.561052,1.231756\H,0,-2.19  
3447,-1.091259,-0.409964\C,0,1.013953,0.281289,0.03215\C,0,2.413833,0.  
363762,-0.096601\S,0,0.195656,-1.240046,-0.033271\Version=ES64L-G16Re  
vA.03\State=3-A\HF=-590.2885373\MP2=-591.2155998\MP3=-591.2685506\MP4D  
=-591.2914947\MP4DQ=-591.2646343\PUHF=-590.2921752\PM2-0=-591.2179142  
\PM3-0=-591.2698398\MP4SDQ=-591.2738593\CCSD=-591.2741498\CCSD(T)=-59  
1.3226523\S2=2.022641\S2-1=2.006048\S2A=2.000247\RMSD=9.972e-09\PG=C01  
[X(C5H6S1)]\@

T1 Diagnostic = 0.02129363

---

**1-thiocyclohex-2-yne (23)**

---

1\1\GINC-NSCC-N2\SP\RCCSD(T)-FC\CC-pVTZ\C5H6S1\DMTHAMAT\04-Dec-2018\0\ \\# rccsd=(t,t1diag)/cc-pvtz geom=connectivity\\thiocyclohexyne\\0,1\C, 0,1.867674,-0.326796,0.084195\C,0,1.107801,0.977087,-0.343719\C,0,-0.2 53065,1.196968,0.348057\H,0,2.651469,-0.553854,-0.645616\H,0,2.338544, -0.216154,1.067619\H,0,0.955185,0.948555,-1.428858\H,0,1.744504,1.8423 8,-0.115581\H,0,-0.129947,1.181453,1.436474\H,0,-0.657627,2.171663,0.0 53561\C,0,0.76826,-1.312584,0.113058\C,0,-0.452135,-1.342327,-0.018691 \S,0,-1.570834,-0.033008,-0.091563\\Version=ES64L-G16RevA.03\\State=1-A \\HF=-590.312795\\MP2=-591.30855\\MP3=-591.3406714\\MP4D=-591.3679615\\MP4D Q=-591.3361033\\MP4SDQ=-591.3463082\\CCSD=-591.3449116\\CCSD(T)=-591.4002 663\\RMSD=4.783e-09\\PG=C01 [X(C5H6S1)]\\@

T1 Diagnostic = 0.01519235

---

**TS from singlet 22 to 23 by C shift**

---

1\1\GINC-NSCC-N12\SP\RCCSD(T)-FC\CC-pVTZ\C5H6S1\DMTHAMAT\04-Dec-2018\0 \\# rccsd=(t,t1diag)/cc-pvtz geom=connectivity\\TS to thiocyclohexyne - C shift\\0,1\C,0,1.57487,0.357603,-0.030087\C,0,0.457462,1.390933,-0 .307667\C,0,-0.83414,1.078575,0.447083\H,0,2.312433,0.39312,-0.830533\ H,0,2.041005,0.566725,0.932554\H,0,0.237876,1.420745,-1.379957\H,0,0.8 4679,2.375033,-0.013027\H,0,-0.678069,1.051967,1.529565\H,0,-1.640267, 1.777102,0.206978\C,0,0.309324,-1.086345,-0.004912\C,0,1.507281,-1.439 536,0.216953\S,0,-1.325534,-0.587004,-0.148363\\Version=ES64L-G16RevA. 03\\State=1-A\\HF=-590.2735755\\MP2=-591.256101\\MP3=-591.2933173\\MP4D=-59 1.3192243\\MP4DQ=-591.2881871\\MP4SDQ=-591.2976076\\CCSD=-591.2959963\\CCS D(T)=-591.3507265\\RMSD=6.246e-09\\PG=C01 [X(C5H6S1)]\\@

T1 Diagnostic = 0.01466933

---

**TS from singlet 22 to 23 by S shift**

---

1\1\GINC-NSCC-N14\SP\RCCSD(T)-FC\CC-pVTZ\C5H6S1\DMTHAMAT\04-Dec-2018\0 \\# rccsd=(t,t1diag)/cc-pvtz geom=connectivity\\TS to thiocyclohexyne- S shift\\0,1\C,0,-1.450759,-0.76104,-0.385994\C,0,-1.456974,0.590825,0 .371755\C,0,-0.192989,1.385982,0.022298\H,0,-2.216109,-1.442899,0.0013 65\H,0,-1.607827,-0.631117,-1.462919\H,0,-1.474185,0.374981,1.444634\H ,0,-2.34956,1.177049,0.121772\H,0,-0.318629,1.888843,-0.941722\H,0,0.0 07112,2.137571,0.790424\C,0,-0.113903,-1.289063,-0.100637\C,0,0.975277 , -1.406811,0.551175\S,0,1.337206,0.336013,-0.169071\\Version=ES64L-G16 RevA.03\\State=1-A\\HF=-590.289954\\MP2=-591.2702217\\MP3=-591.3092386\\MP4 D=-591.3347419\\MP4DQ=-591.3035017\\MP4SDQ=-591.3139408\\CCSD=-591.312657 5\\CCSD(T)=-591.3674746\\RMSD=4.418e-09\\PG=C01 [X(C5H6S1)]\\@

T1 Diagnostic = 0.01783429

---

**2-(1-azacyclohexylidene)carbene (singlet 24)**

---

1\1\GINC-N18\SP\RCCSD(T)-FC\CC-pVTZ\C6H9N1\DMTHAMAT\03-Dec-2018\0\# r  
ccsd=(t,t1diag)/cc-pvtz geom=connectivity\delta lactam carbene singlet\  
0,1\C,0,1.40096,0.73016,-0.336117\C,0,0.220148,1.512281,0.288322\C,0,  
0.107733,-1.471671,-0.195962\C,0,1.42465,-0.743153,0.122088\H,0,0.4011  
02,1.67403,1.360755\H,0,0.101046,2.491633,-0.186529\H,0,1.29996,0.7637  
14,-1.42932\H,0,2.350722,1.21423,-0.077636\H,0,0.107869,-2.493882,0.19  
8957\H,0,-0.057815,-1.518127,-1.279359\H,0,1.596975,-0.784821,1.207863  
\H,0,2.258908,-1.269875,-0.358611\C,0,-1.001766,0.686435,0.094163\C,0,  
-2.088376,0.297757,-0.54885\N,0,-1.017541,-0.733444,0.387072\H,0,-1.31  
607,-1.013654,1.312506\Version=ES64L-G16RevA.03\State=1-A\HF=-286.849  
0817\MP2=-288.0370378\MP3=-288.0803397\MP4D=-288.1085186\MP4DQ=-288.07  
58565\MP4SDQ=-288.0863193\CCSD=-288.0845219\CCSD(T)=-288.1434854\RMSD=  
9.808e-09\PG=C01 [X(C6H9N1)]\@

T1 Diagnostic = 0.01207640

---

**2-(1-azacyclohexylidene)carbene (triplet 24)**

---

1\1\GINC-N17\SP\UCCSD(T)-FC\CC-pVTZ\C6H9N1(3)\DMTHAMAT\07-Dec-201  
8\0\# uccsd=(t,t1diag)/cc-pvtz geom=connectivity\delta lactam carbene  
triplet\0,3\C,0,1.031182,1.190691,-0.335993\C,0,-0.423268,1.311118,0.  
135363\C,0,0.955887,-1.298834,-0.124234\C,0,1.678538,-0.030474,0.32374  
6\H,0,-0.445145,1.618676,1.19099\H,0,-0.971532,2.075136,-0.424487\H,0,  
1.061509,1.075021,-1.428816\H,0,1.582984,2.104977,-0.089594\H,0,1.2520  
37,-2.161026,0.483599\H,0,1.206032,-1.521788,-1.171772\H,0,1.614209,0.  
064184,1.416201\H,0,2.738636,-0.116844,0.059106\C,0,-1.201461,0.011071  
,0.029019\C,0,-2.622048,-0.046725,-0.004935\N,0,-0.497178,-1.140995,-0  
.010738\H,0,-1.071473,-1.972449,-0.097859\Version=ES64L-G16RevA.03\St  
ate=3-A\HF=-286.8534328\MP2=-287.9902447\MP3=-288.0455425\MP4D=-288.07  
0797\MP4DQ=-288.0413241\PUHF=-286.857732\MP2-0=-287.9932114\MP3-0=-2  
88.0472975\MP4SDQ=-288.0512623\CCSD=-288.050733\CCSD(T)=-288.1043475\S  
2=2.030974\S2-1=2.0116\S2A=2.000425\RMSD=9.768e-09\PG=C01 [X(C6H9N1)]\  
\@

T1 Diagnostic = 0.01470484

---

**1-azacyclohepty-2-yne (25)**

---

1\1\GINC-N2\SP\RCCSD(T)-FC\CC-pVTZ\C6H9N1\DMTHAMAT\03-Dec-2018\0\  
\# rccsd=(t,t1diag)/cc-pvtz geom=connectivity\azacycloheptyne\0,1\C,  
0,1.297127,0.88679,0.273345\C,0,1.826661,-0.540502,-0.051274\C,0,-1.36  
7318,0.798818,0.248229\C,0,-0.046118,1.276321,-0.412864\H,0,2.26857,-0  
.566465,-1.055848\H,0,2.603399,-0.835249,0.662578\H,0,1.16722,0.968259  
,1.361128\H,0,2.062166,1.621044,-0.014524\H,0,-2.185344,1.456316,-0.06  
9166\H,0,-1.26119,0.881481,1.34256\H,0,-0.043108,0.960058,-1.464934\H,  
0,-0.094325,2.37331,-0.414066\C,0,0.607348,-1.372251,0.005131\C,0,-0.6  
10642,-1.355328,-0.012543\N,0,-1.743026,-0.584889,-0.142605\H,0,-2.558  
562,-0.927621,0.350364\Version=ES64L-G16RevA.03\State=1-A\HF=-286.870  
8945\MP2=-288.0744823\MP3=-288.1101441\MP4D=-288.1391567\MP4DQ=-288.10  
53217\MP4SDQ=-288.1160954\CCSD=-288.1146625\CCSD(T)=-288.1748796\RMSD=  
7.869e-09\PG=C01 [X(C6H9N1)]\@

T1 Diagnostic = 0.01161414

---

**TS from singlet 24 to 25 by C shift**

---

1\1\GINC-NSCC-N12\SP\RCCSD(T)-FC\CC-pVTZ\C6H9N1\DMTHAMAT\03-Dec-2018\0\# rccsd=(t,t1diag)/cc-pvtz geom=connectivity\TS to azacycloheptyne-C shift\0,1\C,0,0.156784,1.469455,-0.238132\C,0,-1.115283,0.891051,0.39487\C,0,1.406951,-0.755839,-0.295567\C,0,1.445996,0.714722,0.130393\H,0,-1.045038,0.799266,1.484903\H,0,-1.961314,1.539136,0.172288\H,0,0.028292,1.478846,-1.329084\H,0,0.2501,2.515369,0.084957\H,0,2.306055,-1.287852,0.032317\H,0,1.345224,-0.834214,-1.387473\H,0,1.599639,0.769517,1.218722\H,0,2.30745,1.203449,-0.342944\C,0,-2.086885,-0.490412,-0.460568\C,0,-0.94917,-0.865234,-0.026218\N,0,0.239751,-1.466663,0.256903\H,0,0.340974,-1.69933,1.239332\Version=ES64L-G16RevA.03\State=1-A\HF=-286.8307021\MP2=-288.0218438\MP3=-288.0629111\MP4D=-288.0909184\MP4DQ=-288.0574872\MP4SDQ=-288.0677518\CCSD=-288.0661004\CCSD(T)=-288.1262064\RMSD=8.720e-09\PG=C01 [X(C6H9N1)]\@

T1 Diagnostic = 0.01159764

---

**TS from singlet 24 to 25 by N shift**

---

1\1\GINC-NSCC-N2\SP\RCCSD(T)-FC\CC-pVTZ\C6H9N1\DMTHAMAT\04-Dec-2018\0\# rccsd=(t,t1diag)/cc-pvtz geom=connectivity\TS to azacycloheptyne-N shift\0,1\C,0,-1.615018,0.093672,-0.295691\C,0,-1.080632,-1.25279,0.23793\C,0,0.67836,1.316304,-0.240021\C,0,-0.797753,1.29117,0.211358\H,0,-1.303702,-1.373192,1.306125\H,0,-1.540454,-2.095819,-0.293959\H,0,-1.591197,0.073544,-1.392756\H,0,-2.661379,0.203723,0.014069\H,0,1.112936,2.278939,0.06289\H,0,0.737754,1.258103,-1.333489\H,0,-0.831553,1.319189,1.311748\H,0,-1.27259,2.216418,-0.14215\C,0,0.364323,-1.303627,-0.003245\C,0,1.571837,-1.166822,-0.386323\N,0,1.582554,0.289419,0.288695\H,0,1.545608,0.225718,1.30261\Version=ES64L-G16RevA.03\State=1-A\HF=-286.8038041\MP2=-287.9944475\MP3=-288.0357662\MP4D=-288.0645597\MP4DQ=-288.0307754\MP4SDQ=-288.0440503\CCSD=-288.0428782\CCSD(T)=-288.1045484\RMSD=8.180e-09\PG=C01 [X(C6H9N1)]\@

T1 Diagnostic = 0.01914159

---

**2-(1-oxacyclohexylidene)carbene (singlet 26)**

---

1\1\GINC-N18\SP\RCCSD(T)-FC\CC-pVTZ\C6H8O1\DMTHAMAT\04-Dec-2018\0\# rccsd=(t,t1diag)/cc-pvtz geom=connectivity\delta lactone carbene singlet\0,1\C,0,-0.90576,1.25647,0.306884\C,0,0.482336,1.255876,-0.354863\C,0,-0.831975,-1.259326,0.23849\C,0,-1.661131,-0.019882,-0.091156\H,0,0.386013,1.3628,-1.444051\H,0,1.107163,2.078524,0.012263\H,0,-0.786529,1.29079,1.398404\H,0,-1.465823,2.149744,0.006169\H,0,-1.306464,-2.172479,-0.129163\H,0,-0.682349,-1.346517,1.324576\H,0,-1.870454,-0.007695,-1.169131\H,0,-2.621949,-0.086147,0.434587\C,0,1.146011,-0.080509,-0.079152\C,0,2.37046,-0.066161,0.444999\O,0,0.455094,-1.223478,-0.403109\Version=ES64L-G16RevA.03\State=1-A\HF=-306.6881558\MP2=-307.8709157\MP3=-307.9187568\MP4D=-307.9465041\MP4DQ=-307.9160932\MP4SDQ=-307.9272468\CCSD=-307.9263035\CCSD(T)=-307.9819065\RMSD=5.219e-09\PG=C01 [X(C6H8O1)]\@

T1 Diagnostic = 0.01332774



---

**2-(1-oxacyclohexylidene)carbene (triplet 26)**

---

1\1\GINC-N18\SP\UCCSD(T)-FC\CC-pVTZ\C6H8O1(3)\DMTHAMAT\07-Dec-2018\0\\  
# uccsd=(t,t1diag)/cc-pvtz geom=connectivity\ldeltalactonecarbene trip  
let\0,3\C,0,-1.061996,1.186528,0.30623\C,0,0.407241,1.289108,-0.11444  
\C,0,-0.891684,-1.282061,0.166702\C,0,-1.656106,-0.068319,-0.333591\H,  
0,0.46664,1.603179,-1.168024\H,0,0.955314,2.041479,0.460965\H,0,-1.138  
713,1.112216,1.399742\H,0,-1.604339,2.087642,-0.000014\H,0,-1.170782,-  
2.198711,-0.35759\H,0,-1.055054,-1.425616,1.242084\H,0,-1.584484,-0.00  
5269,-1.42769\H,0,-2.713763,-0.197739,-0.074754\C,0,1.182505,-0.012142  
,-0.02204\C,0,2.604675,-0.039616,0.011277\O,0,0.542171,-1.18227,-0.019  
943\\Version=ES64L-G16RevA.03\State=3-A\HF=-306.6685644\MP2=-307.82270  
08\MP3=-307.8731712\MP4D=-307.8990119\MP4DQ=-307.8703037\PUHF=-306.671  
7282\PMP2-0=-307.8247094\PMP3-0=-307.8742943\MP4SDQ=-307.881821\CCSD=-  
307.8808053\CCSD(T)=-307.9341899\S2=2.017524\S2-1=2.004669\S2A=2.00012  
1\RMSD=8.937e-09\PG=C01 [X(C6H8O1)]\@

T1 Diagnostic = 0.01622739

---

**1-oxacyclohepty-2-yne (27)**

---

1\1\GINC-N19\SP\RCCSD(T)-FC\CC-pVTZ\C6H8O1\DMTHAMAT\03-Dec-2018\0\\# r  
ccsd=(t,t1diag)/cc-pvtz geom=connectivity\ldoxacycloheptyne\0,1\C,0,1.  
260114,0.920923,0.261148\C,0,1.818749,-0.490139,-0.073789\C,0,-1.40075  
1,0.721818,0.256104\C,0,-0.106772,1.263431,-0.400387\H,0,2.19956,-0.51  
7611,-1.102806\H,0,2.647422,-0.746456,0.594497\H,0,1.146784,0.999382,1  
.351201\H,0,1.994105,1.6811,-0.039505\H,0,-2.266895,1.292206,-0.089323  
\H,0,-1.327619,0.788251,1.349514\H,0,-0.100473,0.979994,-1.461935\H,0,  
-0.217668,2.356414,-0.370805\C,0,0.633136,-1.372567,0.065109\C,0,-0.57  
6303,-1.296728,-0.043438\O,0,-1.730532,-0.664213,-0.077415\\Version=ES  
64L-G16RevA.03\State=1-A\HF=-306.6952796\MP2=-307.9203961\MP3=-307.950  
5484\MP4D=-307.9797181\MP4DQ=-307.9461454\MP4SDQ=-307.9583815\CCSD=-30  
7.9565105\CCSD(T)=-308.0169768\RMSD=5.762e-09\PG=C01 [X(C6H8O1)]\@

T1 Diagnostic = 0.01252777

---

**TS from singlet 26 to 27 by C shift**

---

1\1\GINC-NSCC-N12\SP\RCCSD(T)-FC\CC-pVTZ\C6H8O1\DMTHAMAT\03-Dec-2018\0\\  
\\# rccsd=(t,t1diag)/cc-pvtz geom=connectivity\ldTS to oxacycloheptyne-  
C shift\0,1\C,0,-0.083133,1.471802,0.246043\C,0,1.159498,0.843297,-0.  
394309\C,0,-1.395816,-0.724251,0.272936\C,0,-1.396593,0.750519,-0.1084  
51\H,0,1.064312,0.723365,-1.47966\H,0,2.034485,1.46138,-0.203155\H,0,0  
.057599,1.487418,1.334862\H,0,-0.154337,2.51547,-0.088771\H,0,-2.29205  
8,-1.237916,-0.080074\H,0,-1.28274,-0.868089,1.353974\H,0,-1.577355,0.  
829521,-1.188939\H,0,-2.238828,1.235307,0.401546\C,0,0.85616,-0.926132  
,0.010096\C,0,1.979866,-0.567535,0.484686\O,0,-0.291371,-1.404082,-0.3  
89474\\Version=ES64L-G16RevA.03\State=1-A\HF=-306.6547804\MP2=-307.869  
3248\MP3=-307.9037526\MP4D=-307.9321397\MP4DQ=-307.8988092\MP4SDQ=-307  
.9106556\CCSD=-307.9084682\CCSD(T)=-307.9690201\RMSD=4.536e-09\PG=C01  
[X(C6H8O1)]\@

T1 Diagnostic = 0.01254699

---

**TS from singlet 26 to 27 by O shift**

---

1\1\GINC-N19\SP\RCCSD(T)-FC\CC-pVTZ\C6H8O1\DMTHAMAT\04-Dec-2018\0\# r  
ccsd=(t,t1diag)/cc-pvtz geom=connectivity\TS to oxacycloheptyne-O shi  
ft\0,1\C,0,1.5604,0.300648,0.308442\C,0,1.236049,-1.108519,-0.239704\  
C,0,-0.885689,1.177864,0.211397\C,0,0.583074,1.378871,-0.192745\H,0,1.  
490678,-1.207851,-1.302189\H,0,1.792472,-1.8821,0.307379\H,0,1.532449,  
0.262274,1.40485\H,0,2.581421,0.566817,0.008583\H,0,-1.472256,2.041003  
,-0.124843\H,0,-0.986721,1.082287,1.300764\H,0,0.629846,1.440541,-1.28  
8976\H,0,0.906374,2.352495,0.199794\C,0,-0.18775,-1.35913,-0.024659\C,  
0,-1.387451,-1.241918,0.427793\O,0,-1.498258,0.057205,-0.431063\Versi  
on=ES64L-G16RevA.03\State=1-A\HF=-306.6247391\MP2=-307.8312091\MP3=-30  
7.8691142\MP4D=-307.8984885\MP4DQ=-307.8654149\MP4SDQ=-307.8808943\CCS  
D=-307.8788404\CCSD(T)=-307.940332\RMSD=8.994e-09\PG=C01 [X(C6H8O1)]\@  
@

T1 Diagnostic = 0.02084432

---

**2-(1-thiocyclohexylidene)carbene (singlet 28)**

---

1\1\GINC-N18\SP\RCCSD(T)-FC\CC-pVTZ\C6H8S1\DMTHAMAT\03-Dec-2018\0\# r  
ccsd=(t,t1diag)/cc-pvtz geom=connectivity\delta thiolactonecarbene si  
nglet\0,1\C,0,-1.773435,0.400482,0.231875\C,0,-0.827374,1.44964,-0.39  
4567\C,0,0.008556,-1.472683,0.413742\C,0,-1.38494,-1.057291,-0.085259\  
H,0,-0.915692,1.44757,-1.488289\H,0,-1.075474,2.453502,-0.032027\H,0,-  
1.773237,0.544269,1.320653\H,0,-2.796442,0.580714,-0.121376\H,0,0.2015  
6,-2.52531,0.179114\H,0,0.110567,-1.323968,1.494383\H,0,-1.434502,-1.2  
20201,-1.170872\H,0,-2.127933,-1.723685,0.372971\C,0,0.569206,1.110641  
,-0.000442\C,0,1.563152,1.169847,0.850065\S,0,1.30501,-0.489794,-0.415  
44\Version=ES64L-G16RevA.03\State=1-A\HF=-629.3666203\MP2=-630.520224  
\MP3=-630.5694455\MP4D=-630.598604\MP4DQ=-630.5637735\MP4SDQ=-630.5743  
709\CCSD=-630.572279\CCSD(T)=-630.6337831\RMSD=3.996e-09\PG=C01 [X(C6H  
8S1)]\@

T1 Diagnostic = 0.01348022

---

**2-(1-thiocyclohexylidene)carbene (triplet 28)**

---

1\1\GINC-N2\SP\UCCSD(T)-FC\CC-pVTZ\C6H8S1(3)\DMTHAMAT\06-Dec-2018  
\0\# uccsd=(t,t1diag)/cc-pvtz geom=connectivity\delta thiolactonecar  
bene triplet\0,3\C,0,-1.209625,1.289597,0.347434\C,0,0.22523,1.561212  
,-0.114829\C,0,-1.162581,-1.226507,0.136227\C,0,-1.800903,0.067724,-0.  
362055\H,0,0.211539,1.881491,-1.1677\H,0,0.670812,2.385467,0.453539\H,  
0,-1.22963,1.125551,1.434383\H,0,-1.820589,2.177027,0.144553\H,0,-1.50  
7707,-2.090606,-0.440128\H,0,-1.417417,-1.393511,1.188751\H,0,-1.65845  
,-0.163134,-1.447069\H,0,-2.880688,0.00371,-0.178297\C,0,1.186655,0.388  
647,-0.023621\C,0,2.588819,0.547967,-0.009949\S,0,0.66666,-1.251506,0.  
010796\Version=ES64L-G16RevA.03\State=3-A\HF=-629.331873\MP2=-630.435  
3317\MP3=-630.4979985\MP4D=-630.5246488\MP4DQ=-630.4933695\PUHF=-629.3  
356606\MP2-0=-630.4377439\MP3-0=-630.4993272\MP4SDQ=-630.5038404\CCS  
D=-630.5039043\CCSD(T)=-630.5603831\S2=2.023889\S2-1=2.006404\S2A=2.00  
0278\RMSD=8.144e-09\PG=C01 [X(C6H8S1)]\@

T1 Diagnostic = 0.01995962

---

**1-thiocyclohepty-2-yne (29)**

---

1\1\GINC-NSCC-N15\SP\RCCSD(T)-FC\CC-pVTZ\C6H8S1\DMTHAMAT\04-Dec-2018\0  
\\# rccsd=(t,t1diag)/cc-pvtz geom=connectivity\\thiocycloheptyne\\0,1\  
C,0,1.762861,0.701011,0.239828\C,0,2.012146,-0.804998,-0.054308\C,0,-0  
.839575,1.203137,0.306178\C,0,0.512146,1.315893,-0.450338\H,0,2.40366,  
-0.933281,-1.07159\H,0,2.747479,-1.217668,0.644586\H,0,1.668433,0.8341  
22,1.325736\H,0,2.652436,1.26269,-0.074611\H,0,-1.478823,2.052234,0.03  
7987\H,0,-0.662649,1.23744,1.386926\H,0,0.406326,0.918523,-1.468204\H,  
0,0.705151,2.391764,-0.554546\C,0,0.678973,-1.415146,0.059395\C,0,-0.5  
37426,-1.344042,0.000025\S,0,-1.873548,-0.280059,-0.051935\\Version=ES  
64L-G16RevA.03\State=1-A\HF=-629.3864245\MP2=-630.5523809\MP3=-630.595  
6746\MP4D=-630.6257569\MP4DQ=-630.5905749\MP4SDQ=-630.6011621\CCSD=-63  
0.5993336\CCSD(T)=-630.6608858\RMSD=4.880e-09\PG=C01 [X(C6H8S1)]\\@

T1 Diagnostic = 0.01236696

---

**TS from singlet 28 to 29 by C shift**

---

1\1\GINC-N19\SP\RCCSD(T)-FC\CC-pVTZ\C6H8S1\DMTHAMAT\03-Dec-2018\0\\# r  
ccsd=(t,t1diag)/cc-pvtz geom=connectivity\\TS to thiocycloheptyne-Csh  
ift\\0,1\C,0,1.425062,1.014277,0.114563\C,0,1.578908,-0.383655,-0.4843  
92\C,0,-1.156937,1.006786,0.470377\C,0,0.067936,1.700147,-0.136076\H,0  
,1.228461,-0.447474,-1.519956\H,0,2.621136,-0.700483,-0.473688\H,0,1.6  
2493,0.954902,1.192374\H,0,2.205156,1.653418,-0.322267\H,0,-2.060558,1  
.590003,0.26364\H,0,-1.055822,0.88257,1.553018\H,0,-0.086983,1.803632,  
-1.218855\H,0,0.114931,2.715685,0.280278\C,0,0.058247,-1.287737,0.1588  
69\C,0,1.136217,-1.751013,0.649005\S,0,-1.452991,-0.640318,-0.274289\\  
Version=ES64L-G16RevA.03\State=1-A\HF=-629.3288964\MP2=-630.48696\MP3=  
-630.5339007\MP4D=-630.5634499\MP4DQ=-630.5282333\MP4SDQ=-630.53862\CC  
SD=-630.5367141\CCSD(T)=-630.5990498\RMSD=7.194e-09\PG=C01 [X(C6H8S1)]  
\\@

T1 Diagnostic = 0.01340585

---

**TS from singlet 28 to 29 by S shift**

---

1\1\GINC-N18\SP\RCCSD(T)-FC\CC-pVTZ\C6H8S1\DMTHAMAT\03-Dec-2018\0\\# r  
ccsd=(t,t1diag)/cc-pvtz geom=connectivity\\TS to thiocycloheptyne-S s  
hift\\0,1\C,0,1.893544,0.09778,0.212606\C,0,1.328839,-1.235079,-0.3187  
98\C,0,-0.364862,1.371304,0.4037\C,0,1.055426,1.322948,-0.186986\H,0,1  
.396328,-1.283217,-1.413577\H,0,1.888724,-2.087498,0.086681\H,0,1.9588  
03,0.040941,1.307065\H,0,2.913305,0.221433,-0.172322\H,0,-0.798975,2.3  
60708,0.21484\H,0,-0.34339,1.213616,1.488078\H,0,0.990167,1.384285,-1.  
281954\H,0,1.587935,2.221642,0.15369\C,0,-0.072027,-1.38007,0.090146\C  
,0,-1.236393,-1.428647,0.584646\S,0,-1.576254,0.214917,-0.318399\\Vers  
ion=ES64L-G16RevA.03\State=1-A\HF=-629.3496426\MP2=-630.5049925\MP3=-6  
30.5531255\MP4D=-630.5823081\MP4DQ=-630.5471543\MP4SDQ=-630.5587954\CC  
SD=-630.5572349\CCSD(T)=-630.6194154\RMSD=7.105e-09\PG=C01 [X(C6H8S1)]  
\\@

T1 Diagnostic = 0.01736777

# Summary of Natural Population Analysis at CCSD/6-311+G\*\*

## 2-(1-azacyclobutylidene)carbene (singlet 12)

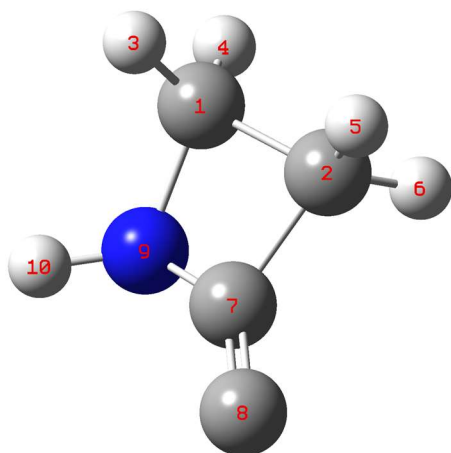

## Summary of Natural Population Analysis:

| Atom      | No | Natural<br>Charge | Natural Population |          |         |          |
|-----------|----|-------------------|--------------------|----------|---------|----------|
|           |    |                   | Core               | Valence  | Rydberg | Total    |
| C         | 1  | -0.09575          | 1.99947            | 4.07623  | 0.02005 | 6.09575  |
| C         | 2  | -0.34013          | 1.99933            | 4.32041  | 0.02040 | 6.34013  |
| H         | 3  | 0.15821           | 0.00000            | 0.83957  | 0.00222 | 0.84179  |
| H         | 4  | 0.16801           | 0.00000            | 0.83034  | 0.00166 | 0.83199  |
| H         | 5  | 0.20031           | 0.00000            | 0.79856  | 0.00113 | 0.79969  |
| H         | 6  | 0.20019           | 0.00000            | 0.79832  | 0.00149 | 0.79981  |
| C         | 7  | -0.12305          | 1.99938            | 4.08428  | 0.03939 | 6.12305  |
| C         | 8  | 0.14217           | 1.99953            | 3.83984  | 0.01846 | 5.85783  |
| N         | 9  | -0.67777          | 1.99950            | 5.65586  | 0.02240 | 7.67777  |
| H         | 10 | 0.36781           | 0.00000            | 0.62966  | 0.00253 | 0.63219  |
| * Total * |    | -0.00000          | 9.99721            | 25.87307 | 0.12972 | 36.00000 |

1-azacyclopent-2-yne (13)

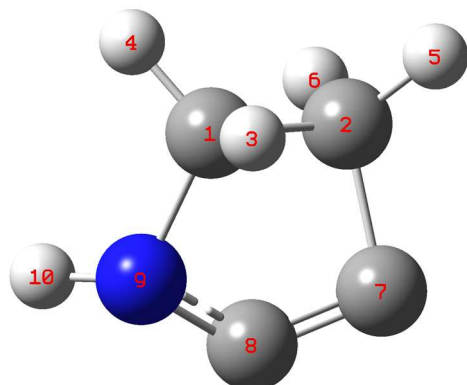

Summary of Natural Population Analysis:

| Atom      | No | Natural<br>Charge | Natural Population |          |         |          |
|-----------|----|-------------------|--------------------|----------|---------|----------|
|           |    |                   | Core               | Valence  | Rydberg | Total    |
| C         | 1  | -0.10398          | 1.99944            | 4.08147  | 0.02308 | 6.10398  |
| C         | 2  | -0.37685          | 1.99937            | 4.35528  | 0.02219 | 6.37685  |
| H         | 3  | 0.17276           | 0.00000            | 0.82524  | 0.00199 | 0.82724  |
| H         | 4  | 0.17051           | 0.00000            | 0.82761  | 0.00188 | 0.82949  |
| H         | 5  | 0.19032           | 0.00000            | 0.80786  | 0.00183 | 0.80968  |
| H         | 6  | 0.18955           | 0.00000            | 0.80734  | 0.00312 | 0.81045  |
| C         | 7  | -0.12367          | 1.99853            | 4.08263  | 0.04250 | 6.12367  |
| C         | 8  | 0.20771           | 1.99836            | 3.74754  | 0.04638 | 5.79229  |
| N         | 9  | -0.70467          | 1.99941            | 5.68040  | 0.02487 | 7.70467  |
| H         | 10 | 0.37831           | 0.00000            | 0.61925  | 0.00244 | 0.62169  |
| * Total * |    | -0.00000          | 9.99511            | 25.83461 | 0.17028 | 36.00000 |

TS from singlet 12 to 13 by C shift

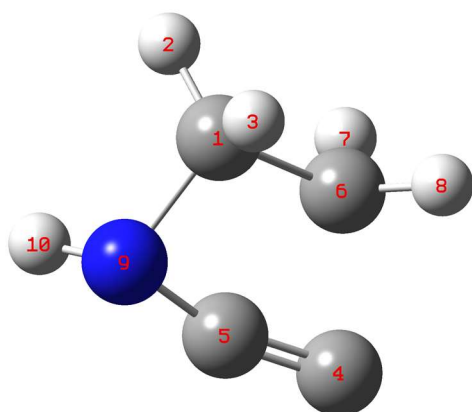

Summary of Natural Population Analysis:

| Atom      | No | Natural<br>Charge | Natural Population |          |         |          |
|-----------|----|-------------------|--------------------|----------|---------|----------|
|           |    |                   | Core               | Valence  | Rydberg | Total    |
| C         | 1  | -0.10066          | 1.99940            | 4.07556  | 0.02570 | 6.10066  |
| H         | 2  | 0.17698           | 0.00000            | 0.82162  | 0.00139 | 0.82302  |
| H         | 3  | 0.18134           | 0.00000            | 0.81725  | 0.00141 | 0.81866  |
| C         | 4  | -0.16690          | 1.99902            | 4.13773  | 0.03016 | 6.16690  |
| C         | 5  | 0.12667           | 1.99881            | 3.83899  | 0.03553 | 5.87333  |
| C         | 6  | -0.28224          | 1.99935            | 4.25821  | 0.02468 | 6.28224  |
| H         | 7  | 0.18653           | 0.00000            | 0.81122  | 0.00225 | 0.81347  |
| H         | 8  | 0.20469           | 0.00000            | 0.79341  | 0.00190 | 0.79531  |
| N         | 9  | -0.69255          | 1.99943            | 5.67024  | 0.02288 | 7.69255  |
| H         | 10 | 0.36615           | 0.00000            | 0.63068  | 0.00317 | 0.63385  |
| * Total * |    | 0.00000           | 9.99602            | 25.85491 | 0.14907 | 36.00000 |

TS from singlet 12 to 13 by C shift

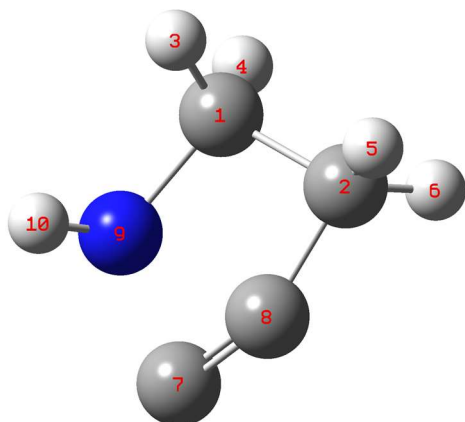

Summary of Natural Population Analysis:

| Atom      | No | Natural<br>Charge | Natural Population |          |         |          |
|-----------|----|-------------------|--------------------|----------|---------|----------|
|           |    |                   | Core               | Valence  | Rydberg | Total    |
| C         | 1  | -0.09385          | 1.99942            | 4.07024  | 0.02418 | 6.09385  |
| C         | 2  | -0.42249          | 1.99921            | 4.40064  | 0.02264 | 6.42249  |
| H         | 3  | 0.17677           | 0.00000            | 0.82183  | 0.00141 | 0.82323  |
| H         | 4  | 0.18189           | 0.00000            | 0.81695  | 0.00116 | 0.81811  |
| H         | 5  | 0.19629           | 0.00000            | 0.80225  | 0.00146 | 0.80371  |
| H         | 6  | 0.20481           | 0.00000            | 0.79345  | 0.00174 | 0.79519  |
| C         | 7  | -0.01495          | 1.99896            | 3.97353  | 0.04245 | 6.01495  |
| C         | 8  | 0.07640           | 1.99908            | 3.89384  | 0.03068 | 5.92360  |
| N         | 9  | -0.66347          | 1.99963            | 5.64105  | 0.02279 | 7.66347  |
| H         | 10 | 0.35861           | 0.00000            | 0.63837  | 0.00302 | 0.64139  |
| * Total * |    | -0.00000          | 9.99631            | 25.85215 | 0.15153 | 36.00000 |

2-(1-oxacyclobutylidene)carbene (singlet 14)

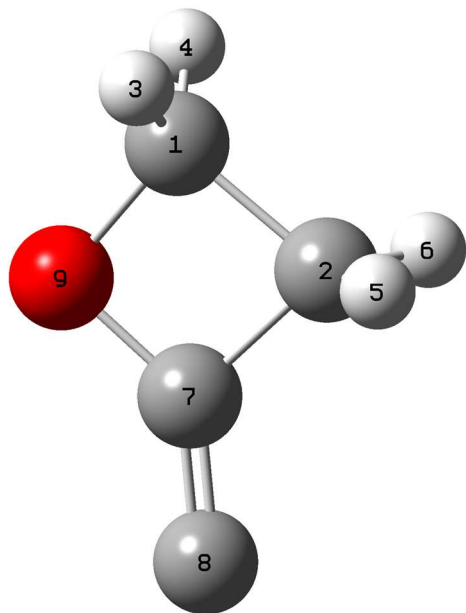

Summary of Natural Population Analysis:

| Atom      | No | Natural<br>Charge | Natural Population |          |         |          |
|-----------|----|-------------------|--------------------|----------|---------|----------|
|           |    |                   | Core               | Valence  | Rydberg | Total    |
| C         | 1  | 0.06787           | 1.99941            | 3.91137  | 0.02135 | 5.93213  |
| C         | 2  | -0.38817          | 1.99934            | 4.37187  | 0.01696 | 6.38817  |
| H         | 3  | 0.16147           | 0.00000            | 0.83665  | 0.00188 | 0.83853  |
| H         | 4  | 0.16147           | 0.00000            | 0.83665  | 0.00188 | 0.83853  |
| H         | 5  | 0.20460           | 0.00000            | 0.79418  | 0.00123 | 0.79540  |
| H         | 6  | 0.20460           | 0.00000            | 0.79418  | 0.00123 | 0.79540  |
| C         | 7  | 0.04808           | 1.99930            | 3.91236  | 0.04026 | 5.95192  |
| C         | 8  | 0.14970           | 1.99954            | 3.83264  | 0.01811 | 5.85030  |
| O         | 9  | -0.60963          | 1.99978            | 6.58809  | 0.02176 | 8.60963  |
| * Total * |    | -0.00000          | 9.99739            | 25.87798 | 0.12463 | 36.00000 |



1-oxacyclopent-2-yne (15)

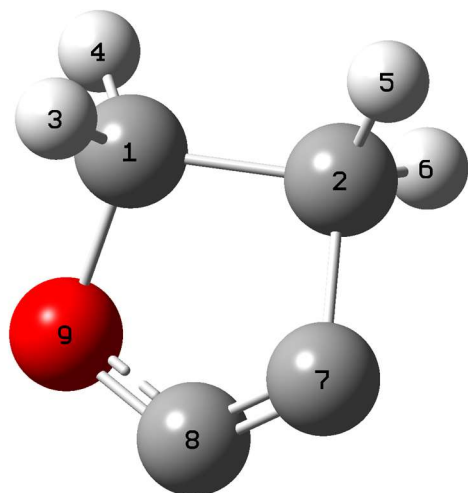

Summary of Natural Population Analysis:

| Atom      | No | Natural<br>Charge | Natural Population |          |         |          |
|-----------|----|-------------------|--------------------|----------|---------|----------|
|           |    |                   | Core               | Valence  | Rydberg | Total    |
| C         | 1  | 0.05958           | 1.99932            | 3.91681  | 0.02429 | 5.94042  |
| C         | 2  | -0.36548          | 1.99935            | 4.34485  | 0.02128 | 6.36548  |
| H         | 3  | 0.16156           | 0.00000            | 0.83647  | 0.00198 | 0.83844  |
| H         | 4  | 0.16872           | 0.00000            | 0.82951  | 0.00176 | 0.83128  |
| H         | 5  | 0.19611           | 0.00000            | 0.80198  | 0.00190 | 0.80389  |
| H         | 6  | 0.19556           | 0.00000            | 0.80142  | 0.00302 | 0.80444  |
| C         | 7  | -0.20376          | 1.99821            | 4.16377  | 0.04178 | 6.20376  |
| C         | 8  | 0.39654           | 1.99788            | 3.55611  | 0.04946 | 5.60346  |
| O         | 9  | -0.60884          | 1.99976            | 6.58814  | 0.02094 | 8.60884  |
| * Total * |    | 0.00000           | 9.99452            | 25.83908 | 0.16640 | 36.00000 |

TS from singlet 14 to 15 by C shift

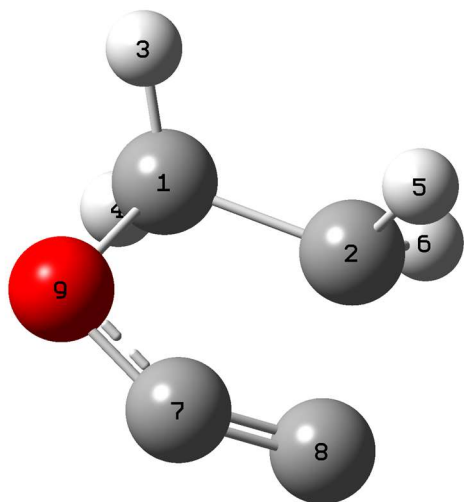

Summary of Natural Population Analysis:

| Atom      | No | Natural<br>Charge | Natural Population |          |         |          |
|-----------|----|-------------------|--------------------|----------|---------|----------|
|           |    |                   | Core               | Valence  | Rydberg | Total    |
| C         | 1  | 0.05729           | 1.99930            | 3.92096  | 0.02245 | 5.94271  |
| C         | 2  | -0.31670          | 1.99935            | 4.29114  | 0.02622 | 6.31670  |
| H         | 3  | 0.17370           | 0.00000            | 0.82447  | 0.00183 | 0.82630  |
| H         | 4  | 0.16826           | 0.00000            | 0.82984  | 0.00190 | 0.83174  |
| H         | 5  | 0.19116           | 0.00000            | 0.80630  | 0.00254 | 0.80884  |
| H         | 6  | 0.20153           | 0.00000            | 0.79669  | 0.00178 | 0.79847  |
| C         | 7  | 0.49604           | 1.99820            | 3.45944  | 0.04632 | 5.50396  |
| C         | 8  | -0.34730          | 1.99849            | 4.31203  | 0.03678 | 6.34730  |
| O         | 9  | -0.62397          | 1.99973            | 6.60284  | 0.02141 | 8.62397  |
| * Total * |    | 0.00000           | 9.99506            | 25.84371 | 0.16123 | 36.00000 |

TS from singlet 14 to 15 by O shift

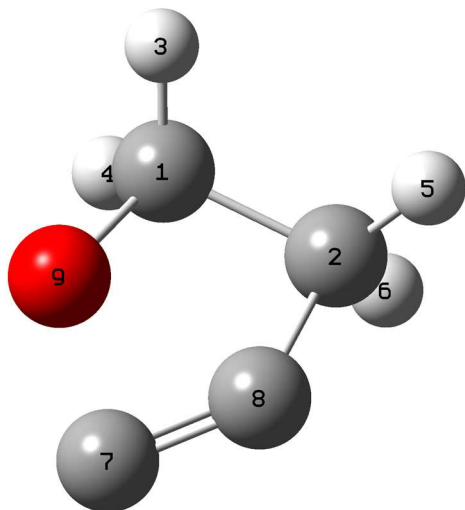

Summary of Natural Population Analysis:

| Atom      | No | Natural<br>Charge | Natural Population |          |         |          |
|-----------|----|-------------------|--------------------|----------|---------|----------|
|           |    |                   | Core               | Valence  | Rydberg | Total    |
| C         | 1  | 0.06853           | 1.99938            | 3.90929  | 0.02280 | 5.93147  |
| C         | 2  | -0.45450          | 1.99924            | 4.43298  | 0.02228 | 6.45450  |
| H         | 3  | 0.17535           | 0.00000            | 0.82273  | 0.00192 | 0.82465  |
| H         | 4  | 0.16522           | 0.00000            | 0.83289  | 0.00189 | 0.83478  |
| H         | 5  | 0.19952           | 0.00000            | 0.79883  | 0.00165 | 0.80048  |
| H         | 6  | 0.21249           | 0.00000            | 0.78569  | 0.00182 | 0.78751  |
| C         | 7  | 0.13188           | 1.99888            | 3.82868  | 0.04056 | 5.86812  |
| C         | 8  | 0.13931           | 1.99915            | 3.82738  | 0.03416 | 5.86069  |
| O         | 9  | -0.63782          | 1.99986            | 6.62115  | 0.01681 | 8.63782  |
| * Total * |    | 0.00000           | 9.99651            | 25.85962 | 0.14387 | 36.00000 |

2-(1-thiocyclobutylidene)carbene (singlet 16)

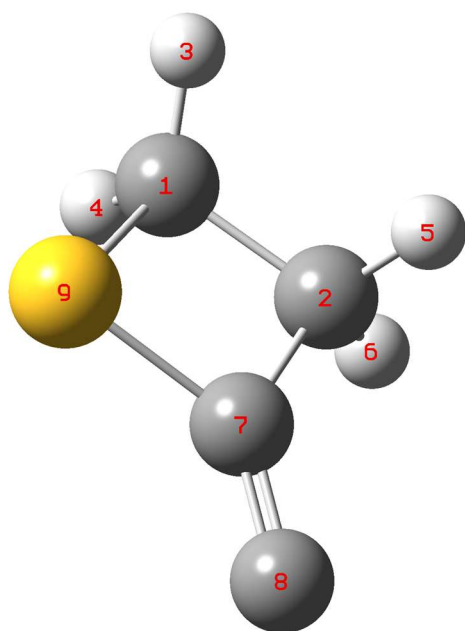

Summary of Natural Population Analysis:

| Atom      | No | Natural<br>Charge | Natural Population |          |         |          |
|-----------|----|-------------------|--------------------|----------|---------|----------|
|           |    |                   | Core               | Valence  | Rydberg | Total    |
| C         | 1  | -0.42067          | 1.99938            | 4.40135  | 0.01994 | 6.42067  |
| C         | 2  | -0.33528          | 1.99933            | 4.31318  | 0.02277 | 6.33528  |
| H         | 3  | 0.19087           | 0.00000            | 0.80704  | 0.00209 | 0.80913  |
| H         | 4  | 0.18976           | 0.00000            | 0.80776  | 0.00248 | 0.81024  |
| H         | 5  | 0.20511           | 0.00000            | 0.79357  | 0.00133 | 0.79489  |
| H         | 6  | 0.20284           | 0.00000            | 0.79580  | 0.00136 | 0.79716  |
| C         | 7  | -0.51263          | 1.99927            | 4.46734  | 0.04603 | 6.51263  |
| C         | 8  | 0.22115           | 1.99950            | 3.75649  | 0.02287 | 5.77885  |
| S         | 9  | 0.25885           | 9.99919            | 5.70034  | 0.04161 | 15.74115 |
| * Total * |    | 0.00000           | 17.99666           | 25.84286 | 0.16048 | 44.00000 |

1-thiocyclopent-2-yne (17)

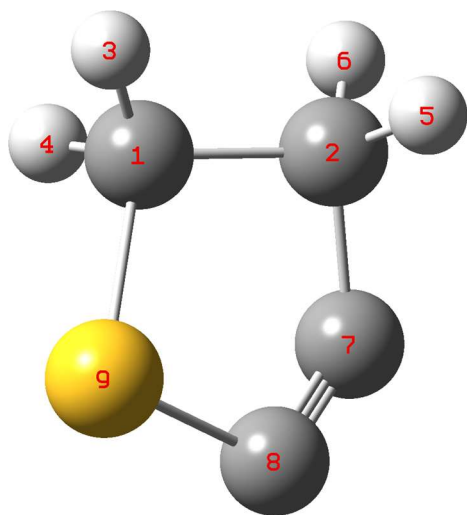

Summary of Natural Population Analysis:

| Atom      | No | Natural<br>Charge | Natural Population |          |         |          |
|-----------|----|-------------------|--------------------|----------|---------|----------|
|           |    |                   | Core               | Valence  | Rydberg | Total    |
| C         | 1  | -0.43016          | 1.99934            | 4.40908  | 0.02175 | 6.43016  |
| C         | 2  | -0.38606          | 1.99925            | 4.36060  | 0.02621 | 6.38606  |
| H         | 3  | 0.19250           | 0.00000            | 0.80539  | 0.00210 | 0.80750  |
| H         | 4  | 0.18936           | 0.00000            | 0.80807  | 0.00257 | 0.81064  |
| H         | 5  | 0.19832           | 0.00000            | 0.79913  | 0.00256 | 0.80168  |
| H         | 6  | 0.20095           | 0.00000            | 0.79768  | 0.00137 | 0.79905  |
| C         | 7  | 0.03063           | 1.99792            | 3.93676  | 0.03469 | 5.96937  |
| C         | 8  | -0.29128          | 1.99775            | 4.25126  | 0.04227 | 6.29128  |
| S         | 9  | 0.29574           | 9.99911            | 5.65533  | 0.04981 | 15.70426 |
| * Total * |    | -0.00000          | 17.99337           | 25.82330 | 0.18333 | 44.00000 |

TS from singlet 16 to 17 by C shift

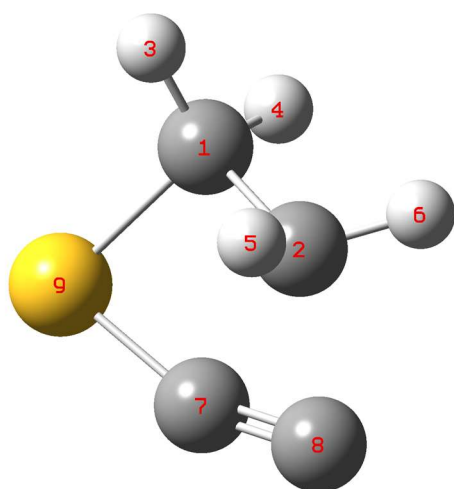

Summary of Natural Population Analysis:

| Atom      | No | Natural<br>Charge | Natural Population |          |         |          |
|-----------|----|-------------------|--------------------|----------|---------|----------|
|           |    |                   | Core               | Valence  | Rydberg | Total    |
| C         | 1  | -0.42278          | 1.99929            | 4.39609  | 0.02740 | 6.42278  |
| C         | 2  | -0.27629          | 1.99931            | 4.24878  | 0.02820 | 6.27629  |
| H         | 3  | 0.20167           | 0.00000            | 0.79665  | 0.00168 | 0.79833  |
| H         | 4  | 0.19763           | 0.00000            | 0.80004  | 0.00233 | 0.80237  |
| H         | 5  | 0.19291           | 0.00000            | 0.80472  | 0.00237 | 0.80709  |
| H         | 6  | 0.21469           | 0.00000            | 0.78362  | 0.00169 | 0.78531  |
| C         | 7  | -0.20461          | 1.99856            | 4.16847  | 0.03759 | 6.20461  |
| C         | 8  | -0.17745          | 1.99893            | 4.14234  | 0.03619 | 6.17745  |
| S         | 9  | 0.27423           | 9.99890            | 5.68170  | 0.04517 | 15.72577 |
| * Total * |    | -0.00000          | 17.99498           | 25.82240 | 0.18261 | 44.00000 |

TS from singlet 16 to 17 by S shift

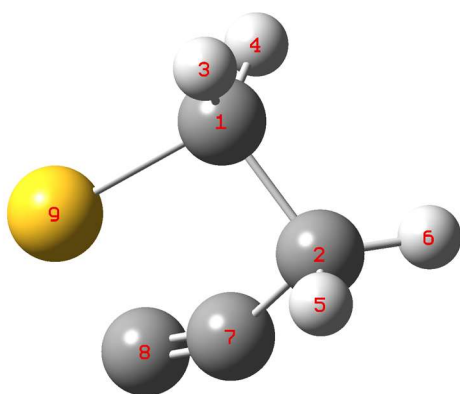

Summary of Natural Population Analysis:

| Atom      | No | Natural<br>Charge | Natural Population |          |         |          |
|-----------|----|-------------------|--------------------|----------|---------|----------|
|           |    |                   | Core               | Valence  | Rydberg | Total    |
| C         | 1  | -0.41344          | 1.99936            | 4.39304  | 0.02104 | 6.41344  |
| C         | 2  | -0.39202          | 1.99920            | 4.36655  | 0.02627 | 6.39202  |
| H         | 3  | 0.19842           | 0.00000            | 0.79928  | 0.00230 | 0.80158  |
| H         | 4  | 0.19551           | 0.00000            | 0.80183  | 0.00267 | 0.80449  |
| H         | 5  | 0.20854           | 0.00000            | 0.78946  | 0.00200 | 0.79146  |
| H         | 6  | 0.21324           | 0.00000            | 0.78523  | 0.00153 | 0.78676  |
| C         | 7  | -0.15535          | 1.99904            | 4.11607  | 0.04025 | 6.15535  |
| C         | 8  | -0.12017          | 1.99902            | 4.08707  | 0.03408 | 6.12017  |
| S         | 9  | 0.26528           | 9.99941            | 5.69244  | 0.04288 | 15.73472 |
| * Total * |    | 0.00000           | 17.99603           | 25.83096 | 0.17301 | 44.00000 |

2-(1-azacyclopentylidene)carbene (singlet 18)

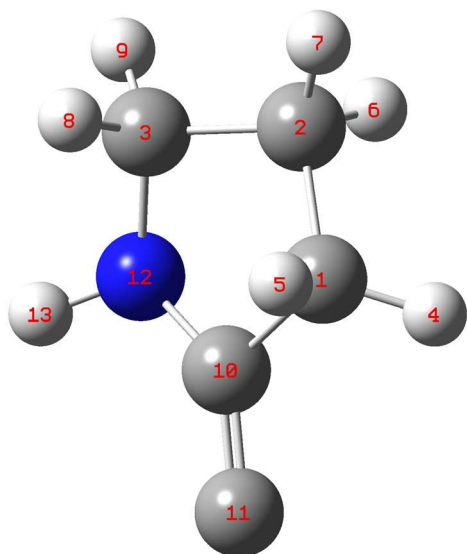

Summary of Natural Population Analysis:

| Atom | No | Natural<br>Charge | Natural Population |         |         |         |
|------|----|-------------------|--------------------|---------|---------|---------|
|      |    |                   | Core               | Valence | Rydberg | Total   |
| C    | 1  | -0.35248          | 1.99934            | 4.33545 | 0.01769 | 6.35248 |
| C    | 2  | -0.34450          | 1.99941            | 4.32742 | 0.01767 | 6.34450 |
| C    | 3  | -0.10544          | 1.99942            | 4.08546 | 0.02056 | 6.10544 |
| H    | 4  | 0.20579           | 0.00000            | 0.79268 | 0.00152 | 0.79421 |
| H    | 5  | 0.19244           | 0.00000            | 0.80570 | 0.00186 | 0.80756 |
| H    | 6  | 0.18404           | 0.00000            | 0.81376 | 0.00220 | 0.81596 |
| H    | 7  | 0.18783           | 0.00000            | 0.81055 | 0.00162 | 0.81217 |
| H    | 8  | 0.14659           | 0.00000            | 0.85123 | 0.00219 | 0.85341 |
| H    | 9  | 0.17607           | 0.00000            | 0.82250 | 0.00143 | 0.82393 |
| C    | 10 | -0.09843          | 1.99932            | 4.05955 | 0.03956 | 6.09843 |
| C    | 11 | 0.12833           | 1.99956            | 3.85607 | 0.01604 | 5.87167 |
| N    | 12 | -0.69281          | 1.99947            | 5.67165 | 0.02169 | 7.69281 |
| H    | 13 | 0.37255           | 0.00000            | 0.62343 | 0.00402 | 0.62745 |



|           |         |          |          |         |          |
|-----------|---------|----------|----------|---------|----------|
| * Total * | 0.00000 | 11.99651 | 31.85544 | 0.14805 | 44.00000 |
|-----------|---------|----------|----------|---------|----------|

# 1-azacyclohex-2-yne (19)

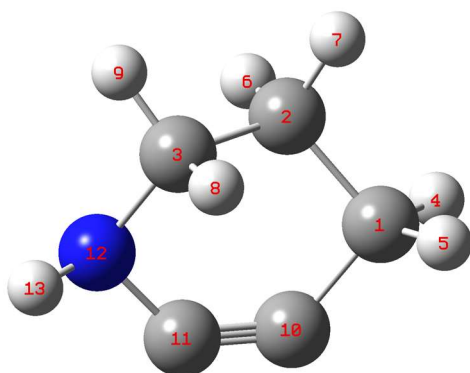

## Summary of Natural Population Analysis:

| Atom      | No | Natural<br>Charge | Natural Population |          |         |          |
|-----------|----|-------------------|--------------------|----------|---------|----------|
|           |    |                   | Core               | Valence  | Rydberg | Total    |
| C         | 1  | -0.36082          | 1.99929            | 4.34020  | 0.02133 | 6.36082  |
| C         | 2  | -0.33950          | 1.99939            | 4.32210  | 0.01802 | 6.33950  |
| C         | 3  | -0.10498          | 1.99937            | 4.08397  | 0.02164 | 6.10498  |
| H         | 4  | 0.19081           | 0.00000            | 0.80715  | 0.00203 | 0.80919  |
| H         | 5  | 0.18724           | 0.00000            | 0.81042  | 0.00233 | 0.81276  |
| H         | 6  | 0.18513           | 0.00000            | 0.81262  | 0.00224 | 0.81487  |
| H         | 7  | 0.18718           | 0.00000            | 0.81122  | 0.00160 | 0.81282  |
| H         | 8  | 0.15111           | 0.00000            | 0.84669  | 0.00220 | 0.84889  |
| H         | 9  | 0.17796           | 0.00000            | 0.82050  | 0.00155 | 0.82204  |
| C         | 10 | -0.09659          | 1.99791            | 4.06863  | 0.03005 | 6.09659  |
| C         | 11 | 0.16100           | 1.99786            | 3.80691  | 0.03423 | 5.83900  |
| N         | 12 | -0.70416          | 1.99947            | 5.67800  | 0.02669 | 7.70416  |
| H         | 13 | 0.36562           | 0.00000            | 0.63164  | 0.00274 | 0.63438  |
| * Total * |    | -0.00000          | 11.99328           | 31.84006 | 0.16665 | 44.00000 |

TS from singlet 18 to 19 by C shift

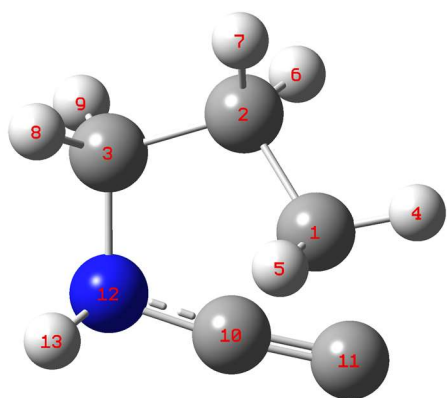

Summary of Natural Population Analysis:

| Atom      | No | Natural<br>Charge | Natural Population |          |         |          |
|-----------|----|-------------------|--------------------|----------|---------|----------|
|           |    |                   | Core               | Valence  | Rydberg | Total    |
| C         | 1  | -0.30526          | 1.99930            | 4.27856  | 0.02740 | 6.30526  |
| C         | 2  | -0.37486          | 1.99937            | 4.35403  | 0.02146 | 6.37486  |
| C         | 3  | -0.10526          | 1.99940            | 4.08512  | 0.02074 | 6.10526  |
| H         | 4  | 0.23890           | 0.00000            | 0.75968  | 0.00142 | 0.76110  |
| H         | 5  | 0.17802           | 0.00000            | 0.81975  | 0.00223 | 0.82198  |
| H         | 6  | 0.19108           | 0.00000            | 0.80718  | 0.00174 | 0.80892  |
| H         | 7  | 0.19352           | 0.00000            | 0.80506  | 0.00142 | 0.80648  |
| H         | 8  | 0.16641           | 0.00000            | 0.83171  | 0.00188 | 0.83359  |
| H         | 9  | 0.17578           | 0.00000            | 0.82252  | 0.00170 | 0.82422  |
| C         | 10 | 0.06713           | 1.99892            | 3.89703  | 0.03692 | 5.93287  |
| C         | 11 | -0.10788          | 1.99916            | 4.08122  | 0.02749 | 6.10788  |
| N         | 12 | -0.69384          | 1.99938            | 5.67111  | 0.02335 | 7.69384  |
| H         | 13 | 0.37625           | 0.00000            | 0.62085  | 0.00289 | 0.62375  |
| * Total * |    | 0.00000           | 11.99553           | 31.83382 | 0.17065 | 44.00000 |

TS from singlet 18 to 19 by N shift

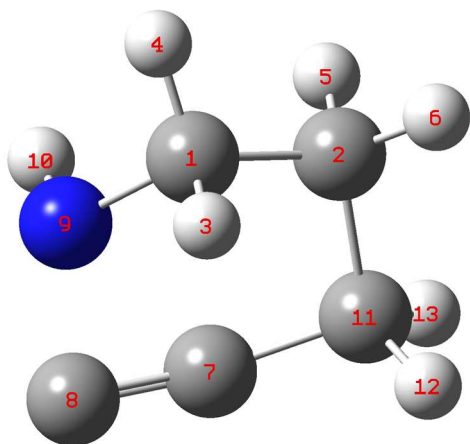

Summary of Natural Population Analysis:

| Atom      | No | Natural<br>Charge | Natural Population |          |         |          |
|-----------|----|-------------------|--------------------|----------|---------|----------|
|           |    |                   | Core               | Valence  | Rydberg | Total    |
| C         | 1  | -0.13071          | 1.99939            | 4.10157  | 0.02976 | 6.13071  |
| C         | 2  | -0.32809          | 1.99940            | 4.31271  | 0.01598 | 6.32809  |
| H         | 3  | 0.17723           | 0.00000            | 0.82117  | 0.00160 | 0.82277  |
| H         | 4  | 0.18506           | 0.00000            | 0.81375  | 0.00119 | 0.81494  |
| H         | 5  | 0.17478           | 0.00000            | 0.82268  | 0.00254 | 0.82522  |
| H         | 6  | 0.18995           | 0.00000            | 0.80805  | 0.00200 | 0.81005  |
| C         | 7  | 0.11276           | 1.99909            | 3.86644  | 0.02171 | 5.88724  |
| C         | 8  | -0.06945          | 1.99880            | 4.02555  | 0.04511 | 6.06945  |
| N         | 9  | -0.64544          | 1.99960            | 5.62069  | 0.02515 | 7.64544  |
| H         | 10 | 0.35302           | 0.00000            | 0.64391  | 0.00307 | 0.64698  |
| C         | 11 | -0.43249          | 1.99922            | 4.40827  | 0.02500 | 6.43249  |
| H         | 12 | 0.20673           | 0.00000            | 0.79126  | 0.00201 | 0.79327  |
| H         | 13 | 0.20665           | 0.00000            | 0.79185  | 0.00151 | 0.79335  |
| * Total * |    | 0.00000           | 11.99549           | 31.82790 | 0.17661 | 44.00000 |

2-(1-oxacyclopentylidene)carbene (singlet 20)

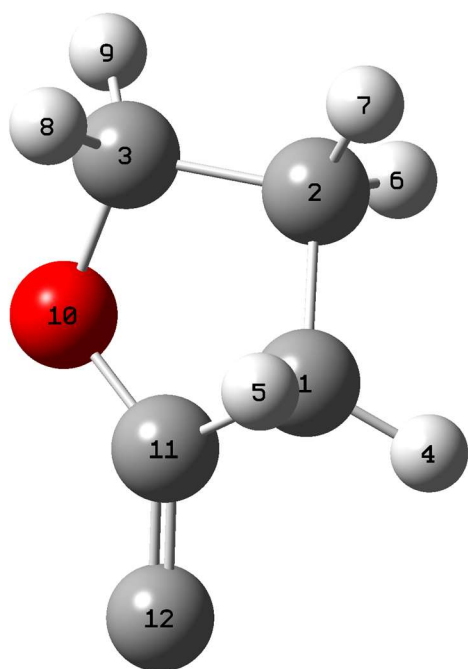

Summary of Natural Population Analysis:

| Atom | No | Natural<br>Charge | Natural Population |         |         |         |
|------|----|-------------------|--------------------|---------|---------|---------|
|      |    |                   | Core               | Valence | Rydberg | Total   |
| C    | 1  | -0.37788          | 1.99935            | 4.36165 | 0.01688 | 6.37788 |
| C    | 2  | -0.36625          | 1.99941            | 4.35111 | 0.01573 | 6.36625 |
| C    | 3  | 0.05505           | 1.99931            | 3.92312 | 0.02252 | 5.94495 |
| H    | 4  | 0.21180           | 0.00000            | 0.78671 | 0.00149 | 0.78820 |
| H    | 5  | 0.19363           | 0.00000            | 0.80453 | 0.00183 | 0.80637 |
| H    | 6  | 0.18585           | 0.00000            | 0.81228 | 0.00187 | 0.81415 |
| H    | 7  | 0.19386           | 0.00000            | 0.80444 | 0.00170 | 0.80614 |

|           |    |          |          |          |         |          |
|-----------|----|----------|----------|----------|---------|----------|
| H         | 8  | 0.14917  | 0.00000  | 0.84885  | 0.00198 | 0.85083  |
| H         | 9  | 0.17096  | 0.00000  | 0.82742  | 0.00162 | 0.82904  |
| O         | 10 | -0.61973 | 1.99975  | 6.59634  | 0.02364 | 8.61973  |
| C         | 11 | 0.05911  | 1.99916  | 3.89858  | 0.04316 | 5.94089  |
| C         | 12 | 0.14443  | 1.99956  | 3.84070  | 0.01530 | 5.85557  |
| <hr/>     |    |          |          |          |         |          |
| * Total * |    | -0.00000 | 11.99654 | 31.85574 | 0.14771 | 44.00000 |

# 1-oxacyclohex-2-yne (21)

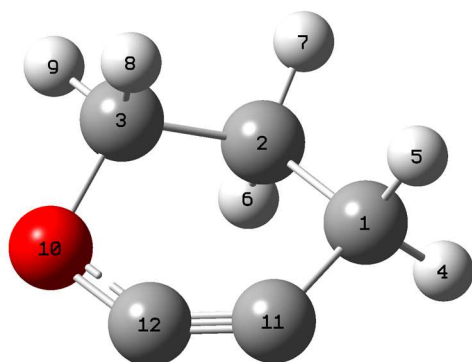

## Summary of Natural Population Analysis:

| Atom      | No | Natural Charge | Natural Population |          |         |          |
|-----------|----|----------------|--------------------|----------|---------|----------|
|           |    |                | Core               | Valence  | Rydberg | Total    |
| C         | 1  | -0.34883       | 1.99930            | 4.32801  | 0.02152 | 6.34883  |
| C         | 2  | -0.37076       | 1.99939            | 4.35485  | 0.01652 | 6.37076  |
| C         | 3  | 0.05583        | 1.99924            | 3.92155  | 0.02338 | 5.94417  |
| H         | 4  | 0.19841        | 0.00000            | 0.79951  | 0.00208 | 0.80159  |
| H         | 5  | 0.18901        | 0.00000            | 0.80875  | 0.00224 | 0.81099  |
| H         | 6  | 0.18523        | 0.00000            | 0.81261  | 0.00216 | 0.81477  |
| H         | 7  | 0.19168        | 0.00000            | 0.80662  | 0.00171 | 0.80832  |
| H         | 8  | 0.15909        | 0.00000            | 0.83894  | 0.00197 | 0.84091  |
| H         | 9  | 0.17528        | 0.00000            | 0.82311  | 0.00161 | 0.82472  |
| O         | 10 | -0.60875       | 1.99975            | 6.58510  | 0.02390 | 8.60875  |
| C         | 11 | -0.21336       | 1.99789            | 4.18181  | 0.03366 | 6.21336  |
| C         | 12 | 0.38717        | 1.99761            | 3.57961  | 0.03561 | 5.61283  |
| <hr/>     |    |                |                    |          |         |          |
| * Total * |    | 0.00000        | 11.99318           | 31.84047 | 0.16635 | 44.00000 |

TS from singlet 20 to 21 by C shift

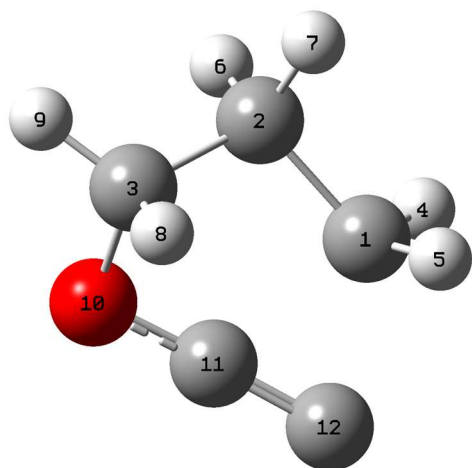

Summary of Natural Population Analysis:

| Atom | No | Natural<br>Charge | Natural Population |         |         |         |
|------|----|-------------------|--------------------|---------|---------|---------|
|      |    |                   | Core               | Valence | Rydberg | Total   |
| C    | 1  | -0.29500          | 1.99928            | 4.26960 | 0.02612 | 6.29500 |
| C    | 2  | -0.38305          | 1.99937            | 4.36298 | 0.02070 | 6.38305 |
| C    | 3  | 0.05363           | 1.99927            | 3.92044 | 0.02666 | 5.94637 |
| H    | 4  | 0.20565           | 0.00000            | 0.79265 | 0.00170 | 0.79435 |
| H    | 5  | 0.19748           | 0.00000            | 0.80063 | 0.00189 | 0.80252 |
| H    | 6  | 0.19156           | 0.00000            | 0.80670 | 0.00173 | 0.80844 |
| H    | 7  | 0.20224           | 0.00000            | 0.79650 | 0.00127 | 0.79776 |
| H    | 8  | 0.16187           | 0.00000            | 0.83648 | 0.00165 | 0.83813 |
| H    | 9  | 0.17832           | 0.00000            | 0.82062 | 0.00106 | 0.82168 |
| O    | 10 | -0.59710          | 1.99970            | 6.57619 | 0.02121 | 8.59710 |
| C    | 11 | 0.26309           | 1.99862            | 3.70269 | 0.03560 | 5.73691 |
| C    | 12 | -0.17869          | 1.99906            | 4.14851 | 0.03112 | 6.17869 |

\* Total \*      0.00000      11.99530      31.83399      0.17070      44.00000

TS from singlet 20 to 21 by O shift

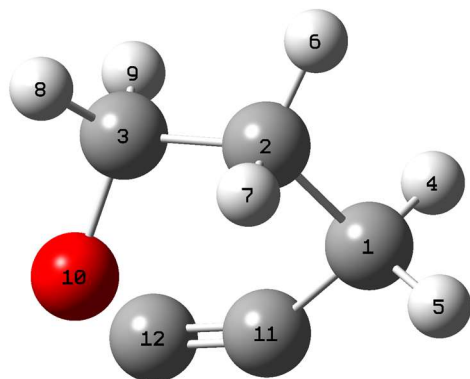

Summary of Natural Population Analysis:

|           |    | Natural Population |          |          |         |          |
|-----------|----|--------------------|----------|----------|---------|----------|
| Atom      | No | Natural Charge     | Core     | Valence  | Rydberg | Total    |
| C         | 1  | -0.44473           | 1.99923  | 4.42103  | 0.02447 | 6.44473  |
| C         | 2  | -0.33836           | 1.99940  | 4.32346  | 0.01550 | 6.33836  |
| C         | 3  | 0.03688            | 1.99933  | 3.93429  | 0.02950 | 5.96312  |
| H         | 4  | 0.21477            | 0.00000  | 0.78324  | 0.00199 | 0.78523  |
| H         | 5  | 0.20351            | 0.00000  | 0.79493  | 0.00155 | 0.79649  |
| H         | 6  | 0.19200            | 0.00000  | 0.80616  | 0.00184 | 0.80800  |
| H         | 7  | 0.18860            | 0.00000  | 0.80923  | 0.00217 | 0.81140  |
| H         | 8  | 0.17932            | 0.00000  | 0.81960  | 0.00109 | 0.82068  |
| H         | 9  | 0.15574            | 0.00000  | 0.84224  | 0.00203 | 0.84426  |
| O         | 10 | -0.63149           | 1.99984  | 6.61009  | 0.02156 | 8.63149  |
| C         | 11 | 0.17628            | 1.99914  | 3.79979  | 0.02480 | 5.82372  |
| C         | 12 | 0.06748            | 1.99871  | 3.89456  | 0.03925 | 5.93252  |
| * Total * |    | 0.00000            | 11.99563 | 31.83861 | 0.16575 | 44.00000 |

2-(1-thiocyclopentylidene)carbene (singlet 22)

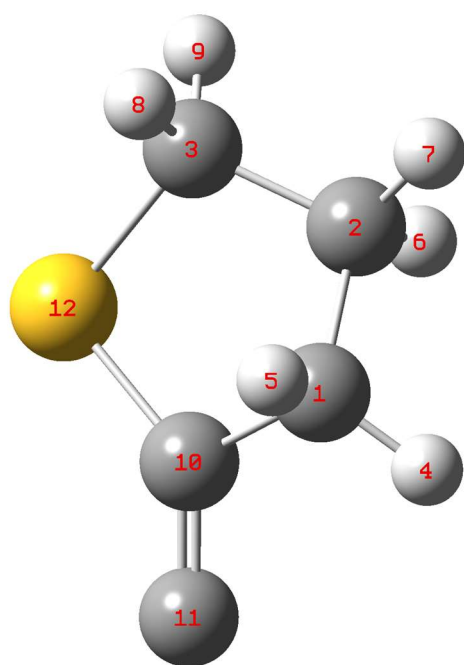

Summary of Natural Population Analysis:

| Atom | No | Natural<br>Charge | Natural Population |         |         |         |
|------|----|-------------------|--------------------|---------|---------|---------|
|      |    |                   | Core               | Valence | Rydberg | Total   |
| C    | 1  | -0.33964          | 1.99931            | 4.31667 | 0.02366 | 6.33964 |
| C    | 2  | -0.34383          | 1.99939            | 4.32216 | 0.02228 | 6.34383 |
| C    | 3  | -0.44538          | 1.99933            | 4.42570 | 0.02036 | 6.44538 |
| H    | 4  | 0.20815           | 0.00000            | 0.79040 | 0.00145 | 0.79185 |
| H    | 5  | 0.19323           | 0.00000            | 0.80523 | 0.00154 | 0.80677 |



|           |    |          |          |          |         |          |
|-----------|----|----------|----------|----------|---------|----------|
| H         | 6  | 0.18787  | 0.00000  | 0.81052  | 0.00162 | 0.81213  |
| H         | 7  | 0.19260  | 0.00000  | 0.80601  | 0.00139 | 0.80740  |
| H         | 8  | 0.18489  | 0.00000  | 0.81258  | 0.00253 | 0.81511  |
| H         | 9  | 0.20153  | 0.00000  | 0.79661  | 0.00186 | 0.79847  |
| C         | 10 | -0.51341 | 1.99916  | 4.47080  | 0.04345 | 6.51341  |
| C         | 11 | 0.21621  | 1.99953  | 3.76222  | 0.02204 | 5.78379  |
| S         | 12 | 0.25780  | 9.99916  | 5.69968  | 0.04336 | 15.74220 |
| =====     |    |          |          |          |         |          |
| * Total * |    | -0.00000 | 19.99588 | 31.81857 | 0.18555 | 52.00000 |

1-thiocyclohex-2-yne (23)

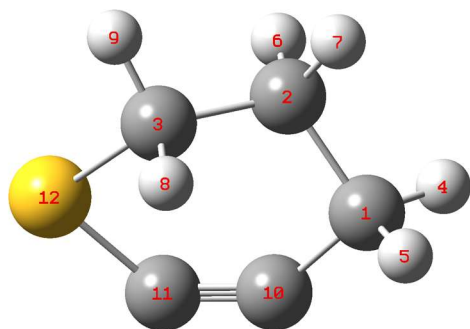

Summary of Natural Population Analysis:

| Atom | No | Natural Charge | Natural Population |         |         |          |
|------|----|----------------|--------------------|---------|---------|----------|
|      |    |                | Core               | Valence | Rydberg | Total    |
| C    | 1  | -0.38775       | 1.99927            | 4.36358 | 0.02490 | 6.38775  |
| C    | 2  | -0.33230       | 1.99937            | 4.31493 | 0.01799 | 6.33230  |
| C    | 3  | -0.45426       | 1.99928            | 4.43270 | 0.02228 | 6.45426  |
| H    | 4  | 0.20638        | 0.00000            | 0.79203 | 0.00159 | 0.79362  |
| H    | 5  | 0.19414        | 0.00000            | 0.80404 | 0.00183 | 0.80586  |
| H    | 6  | 0.18726        | 0.00000            | 0.81062 | 0.00212 | 0.81274  |
| H    | 7  | 0.19018        | 0.00000            | 0.80810 | 0.00172 | 0.80982  |
| H    | 8  | 0.18730        | 0.00000            | 0.81016 | 0.00255 | 0.81270  |
| H    | 9  | 0.19934        | 0.00000            | 0.79887 | 0.00179 | 0.80066  |
| C    | 10 | 0.00983        | 1.99808            | 3.96519 | 0.02689 | 5.99017  |
| C    | 11 | -0.28796       | 1.99777            | 4.25648 | 0.03371 | 6.28796  |
| S    | 12 | 0.28785        | 9.99902            | 5.66120 | 0.05193 | 15.71215 |



|           |    |          |          |          |         |          |
|-----------|----|----------|----------|----------|---------|----------|
| H         | 8  | 0.19453  | 0.00000  | 0.80274  | 0.00272 | 0.80547  |
| H         | 9  | 0.20332  | 0.00000  | 0.79501  | 0.00167 | 0.79668  |
| C         | 10 | -0.33682 | 1.99868  | 4.30061  | 0.03752 | 6.33682  |
| C         | 11 | -0.09309 | 1.99912  | 4.06144  | 0.03252 | 6.09309  |
| S         | 12 | 0.30846  | 9.99889  | 5.64602  | 0.04663 | 15.69154 |
| <hr/>     |    |          |          |          |         |          |
| * Total * |    | -0.00000 | 19.99460 | 31.80441 | 0.20099 | 52.00000 |

TS from singlet 22 to 23 by S shift

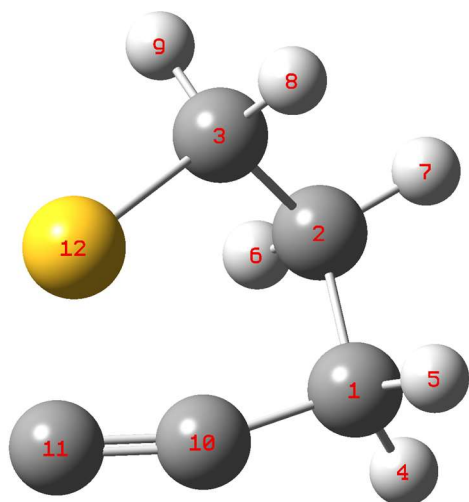

Summary of Natural Population Analysis:

| Atom | No | Natural Charge | Natural Population |         |         |         |
|------|----|----------------|--------------------|---------|---------|---------|
|      |    |                | Core               | Valence | Rydberg | Total   |
| C    | 1  | -0.42710       | 1.99918            | 4.40268 | 0.02523 | 6.42710 |
| C    | 2  | -0.33231       | 1.99938            | 4.31534 | 0.01758 | 6.33231 |
| C    | 3  | -0.45789       | 1.99929            | 4.43770 | 0.02090 | 6.45789 |
| H    | 4  | 0.23355        | 0.00000            | 0.76504 | 0.00140 | 0.76645 |

|           |    |          |          |          |         |          |
|-----------|----|----------|----------|----------|---------|----------|
| H         | 5  | 0.20887  | 0.00000  | 0.78934  | 0.00179 | 0.79113  |
| H         | 6  | 0.18897  | 0.00000  | 0.80919  | 0.00185 | 0.81103  |
| H         | 7  | 0.18973  | 0.00000  | 0.80840  | 0.00187 | 0.81027  |
| H         | 8  | 0.18937  | 0.00000  | 0.80834  | 0.00229 | 0.81063  |
| H         | 9  | 0.19938  | 0.00000  | 0.79874  | 0.00188 | 0.80062  |
| C         | 10 | -0.00565 | 1.99901  | 3.97209  | 0.03455 | 6.00565  |
| C         | 11 | -0.24785 | 1.99875  | 4.20854  | 0.04055 | 6.24785  |
| S         | 12 | 0.26091  | 9.99936  | 5.69456  | 0.04517 | 15.73909 |
| =====     |    |          |          |          |         |          |
| * Total * |    | 0.00000  | 19.99498 | 31.80996 | 0.19506 | 52.00000 |

2-(1-azacyclohexylidene)carbene (singlet 24)

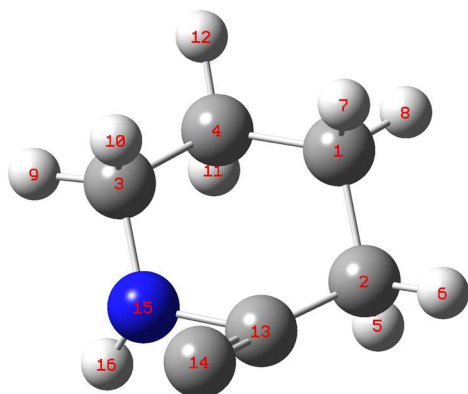

Summary of Natural Population Analysis:

| Atom | No | Natural Charge | Natural Population |         |         |         |
|------|----|----------------|--------------------|---------|---------|---------|
|      |    |                | Core               | Valence | Rydberg | Total   |
| C    | 1  | -0.32565       | 1.99940            | 4.30860 | 0.01766 | 6.32565 |
| C    | 2  | -0.37010       | 1.99932            | 4.35178 | 0.01900 | 6.37010 |
| C    | 3  | -0.10636       | 1.99939            | 4.07869 | 0.02829 | 6.10636 |
| C    | 4  | -0.35070       | 1.99940            | 4.33437 | 0.01694 | 6.35070 |
| H    | 5  | 0.18380        | 0.00000            | 0.81364 | 0.00256 | 0.81620 |
| H    | 6  | 0.20227        | 0.00000            | 0.79600 | 0.00173 | 0.79773 |
| H    | 7  | 0.17534        | 0.00000            | 0.82240 | 0.00226 | 0.82466 |

|           |    |          |          |          |         |          |
|-----------|----|----------|----------|----------|---------|----------|
| H         | 8  | 0.17812  | 0.00000  | 0.82030  | 0.00158 | 0.82188  |
| H         | 9  | 0.17418  | 0.00000  | 0.82452  | 0.00131 | 0.82582  |
| H         | 10 | 0.17855  | 0.00000  | 0.81966  | 0.00179 | 0.82145  |
| H         | 11 | 0.16522  | 0.00000  | 0.83206  | 0.00272 | 0.83478  |
| H         | 12 | 0.18206  | 0.00000  | 0.81625  | 0.00169 | 0.81794  |
| C         | 13 | -0.09567 | 1.99912  | 4.05392  | 0.04264 | 6.09567  |
| C         | 14 | 0.07108  | 1.99936  | 3.91118  | 0.01838 | 5.92892  |
| N         | 15 | -0.63637 | 1.99949  | 5.61288  | 0.02400 | 7.63637  |
| H         | 16 | 0.37422  | 0.00000  | 0.62335  | 0.00243 | 0.62578  |
| =====     |    |          |          |          |         |          |
| * Total * |    | -0.00000 | 13.99547 | 37.81957 | 0.18497 | 52.00000 |

# 1-azacyclohepty-2-yne (25)

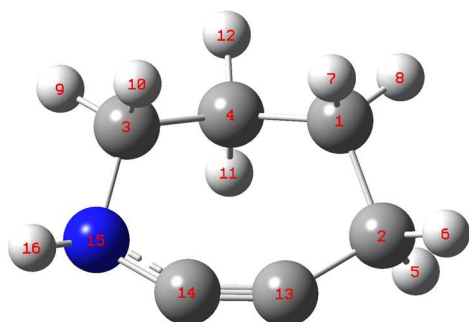

## Summary of Natural Population Analysis:

| Atom | No | Natural Charge | Natural Population |         |         |         |
|------|----|----------------|--------------------|---------|---------|---------|
|      |    |                | Core               | Valence | Rydberg | Total   |
| C    | 1  | -0.31385       | 1.99939            | 4.29590 | 0.01856 | 6.31385 |
| C    | 2  | -0.37931       | 1.99928            | 4.35882 | 0.02120 | 6.37931 |
| C    | 3  | -0.09058       | 1.99936            | 4.06909 | 0.02213 | 6.09058 |
| C    | 4  | -0.35741       | 1.99938            | 4.33912 | 0.01891 | 6.35741 |
| H    | 5  | 0.18722        | 0.00000            | 0.81023 | 0.00255 | 0.81278 |
| H    | 6  | 0.19377        | 0.00000            | 0.80431 | 0.00192 | 0.80623 |
| H    | 7  | 0.17103        | 0.00000            | 0.82669 | 0.00227 | 0.82897 |
| H    | 8  | 0.17443        | 0.00000            | 0.82394 | 0.00164 | 0.82557 |

|           |    |          |          |          |         |          |
|-----------|----|----------|----------|----------|---------|----------|
| H         | 9  | 0.16757  | 0.00000  | 0.83087  | 0.00155 | 0.83243  |
| H         | 10 | 0.14680  | 0.00000  | 0.85073  | 0.00247 | 0.85320  |
| H         | 11 | 0.18677  | 0.00000  | 0.81071  | 0.00252 | 0.81323  |
| H         | 12 | 0.18071  | 0.00000  | 0.81781  | 0.00148 | 0.81929  |
| C         | 13 | -0.09514 | 1.99815  | 4.07575  | 0.02124 | 6.09514  |
| C         | 14 | 0.16538  | 1.99805  | 3.81121  | 0.02536 | 5.83462  |
| N         | 15 | -0.70774 | 1.99945  | 5.68134  | 0.02695 | 7.70774  |
| H         | 16 | 0.37036  | 0.00000  | 0.62702  | 0.00262 | 0.62964  |
| <hr/>     |    |          |          |          |         |          |
| * Total * |    | 0.00000  | 13.99307 | 37.83354 | 0.17339 | 52.00000 |

TS from singlet 24 to 25 by C shift

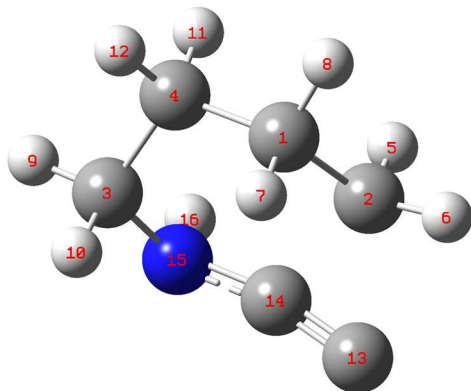

Summary of Natural Population Analysis:

| Atom | No | Natural Charge | Natural Population |         |         |         |
|------|----|----------------|--------------------|---------|---------|---------|
|      |    |                | Core               | Valence | Rydberg | Total   |
| C    | 1  | -0.35285       | 1.99935            | 4.33006 | 0.02344 | 6.35285 |
| C    | 2  | -0.32440       | 1.99925            | 4.30156 | 0.02359 | 6.32440 |
| C    | 3  | -0.10114       | 1.99936            | 4.07930 | 0.02248 | 6.10114 |

|           |    |          |          |          |         |          |
|-----------|----|----------|----------|----------|---------|----------|
| C         | 4  | -0.35251 | 1.99940  | 4.33575  | 0.01737 | 6.35251  |
| H         | 5  | 0.17715  | 0.00000  | 0.82024  | 0.00261 | 0.82285  |
| H         | 6  | 0.24164  | 0.00000  | 0.75656  | 0.00180 | 0.75836  |
| H         | 7  | 0.18554  | 0.00000  | 0.81250  | 0.00196 | 0.81446  |
| H         | 8  | 0.18382  | 0.00000  | 0.81476  | 0.00141 | 0.81618  |
| H         | 9  | 0.17380  | 0.00000  | 0.82466  | 0.00154 | 0.82620  |
| H         | 10 | 0.17334  | 0.00000  | 0.82449  | 0.00217 | 0.82666  |
| H         | 11 | 0.16455  | 0.00000  | 0.83297  | 0.00248 | 0.83545  |
| H         | 12 | 0.18353  | 0.00000  | 0.81477  | 0.00170 | 0.81647  |
| C         | 13 | -0.06812 | 1.99924  | 4.04302  | 0.02586 | 6.06812  |
| C         | 14 | 0.04056  | 1.99892  | 3.92315  | 0.03737 | 5.95944  |
| N         | 15 | -0.69763 | 1.99938  | 5.67105  | 0.02720 | 7.69763  |
| H         | 16 | 0.37272  | 0.00000  | 0.62434  | 0.00294 | 0.62728  |
| =====     |    |          |          |          |         |          |
| * Total * |    | 0.00000  | 13.99490 | 37.80918 | 0.19592 | 52.00000 |

TS from singlet 24 to 25 by N shift

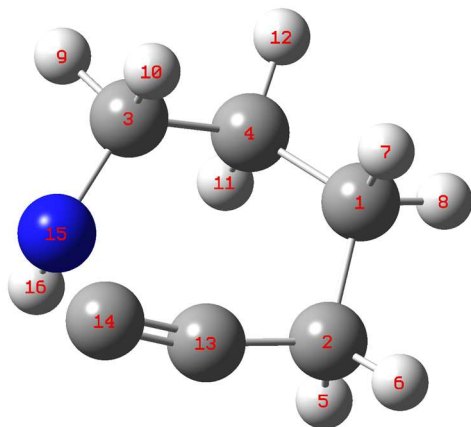

Summary of Natural Population Analysis:

| Atom | No | Natural Charge | Natural Population |         |         |         |
|------|----|----------------|--------------------|---------|---------|---------|
|      |    |                | Core               | Valence | Rydberg | Total   |
| C    | 1  | -0.31989       | 1.99938            | 4.30273 | 0.01777 | 6.31989 |
| C    | 2  | -0.44485       | 1.99922            | 4.42045 | 0.02518 | 6.44485 |

|           |    |          |          |          |         |          |
|-----------|----|----------|----------|----------|---------|----------|
| C         | 3  | -0.12284 | 1.99937  | 4.09260  | 0.03086 | 6.12284  |
| C         | 4  | -0.35731 | 1.99939  | 4.34030  | 0.01762 | 6.35731  |
| H         | 5  | 0.19800  | 0.00000  | 0.79980  | 0.00220 | 0.80200  |
| H         | 6  | 0.23450  | 0.00000  | 0.76412  | 0.00137 | 0.76550  |
| H         | 7  | 0.17988  | 0.00000  | 0.81795  | 0.00217 | 0.82012  |
| H         | 8  | 0.18154  | 0.00000  | 0.81683  | 0.00163 | 0.81846  |
| H         | 9  | 0.17462  | 0.00000  | 0.82419  | 0.00120 | 0.82538  |
| H         | 10 | 0.17663  | 0.00000  | 0.82143  | 0.00194 | 0.82337  |
| H         | 11 | 0.16333  | 0.00000  | 0.83398  | 0.00269 | 0.83667  |
| H         | 12 | 0.18422  | 0.00000  | 0.81395  | 0.00183 | 0.81578  |
| C         | 13 | 0.14471  | 1.99909  | 3.83436  | 0.02183 | 5.85529  |
| C         | 14 | -0.09288 | 1.99877  | 4.04825  | 0.04586 | 6.09288  |
| N         | 15 | -0.65354 | 1.99958  | 5.62901  | 0.02496 | 7.65354  |
| H         | 16 | 0.35388  | 0.00000  | 0.64292  | 0.00320 | 0.64612  |
| =====     |    |          |          |          |         |          |
| * Total * |    | -0.00000 | 13.99480 | 37.80289 | 0.20231 | 52.00000 |

2-(1-oxacyclohexylidene)carbene (singlet 26)

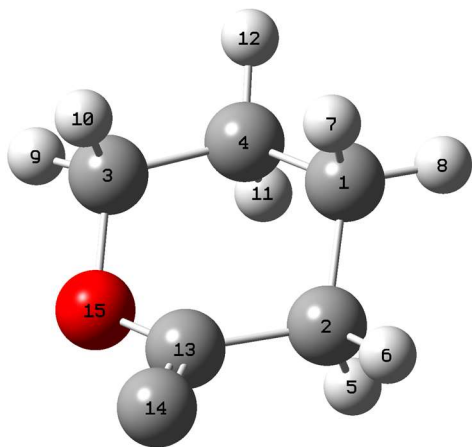

Summary of Natural Population Analysis:

| Atom | No | Natural Charge | Natural Population |         |         |         |
|------|----|----------------|--------------------|---------|---------|---------|
|      |    |                | Core               | Valence | Rydberg | Total   |
| C    | 1  | -0.33343       | 1.99939            | 4.31646 | 0.01758 | 6.33343 |
| C    | 2  | -0.38321       | 1.99932            | 4.36061 | 0.02327 | 6.38321 |



|           |    |          |          |          |         |          |
|-----------|----|----------|----------|----------|---------|----------|
| C         | 3  | 0.05869  | 1.99926  | 3.91864  | 0.02341 | 5.94131  |
| C         | 4  | -0.36839 | 1.99940  | 4.35253  | 0.01646 | 6.36839  |
| H         | 5  | 0.19217  | 0.00000  | 0.80586  | 0.00197 | 0.80783  |
| H         | 6  | 0.20352  | 0.00000  | 0.79512  | 0.00137 | 0.79648  |
| H         | 7  | 0.17570  | 0.00000  | 0.82210  | 0.00221 | 0.82430  |
| H         | 8  | 0.18313  | 0.00000  | 0.81518  | 0.00169 | 0.81687  |
| H         | 9  | 0.16927  | 0.00000  | 0.82918  | 0.00156 | 0.83073  |
| H         | 10 | 0.14733  | 0.00000  | 0.85051  | 0.00216 | 0.85267  |
| H         | 11 | 0.17723  | 0.00000  | 0.82057  | 0.00220 | 0.82277  |
| H         | 12 | 0.18623  | 0.00000  | 0.81211  | 0.00166 | 0.81377  |
| C         | 13 | 0.04757  | 1.99908  | 3.90712  | 0.04624 | 5.95243  |
| C         | 14 | 0.18157  | 1.99956  | 3.80429  | 0.01458 | 5.81843  |
| O         | 15 | -0.63740 | 1.99975  | 6.60912  | 0.02853 | 8.63740  |
| =====     |    |          |          |          |         |          |
| * Total * |    | 0.00000  | 13.99575 | 37.81938 | 0.18486 | 52.00000 |

# 1-oxacyclohepty-2-yne (27)

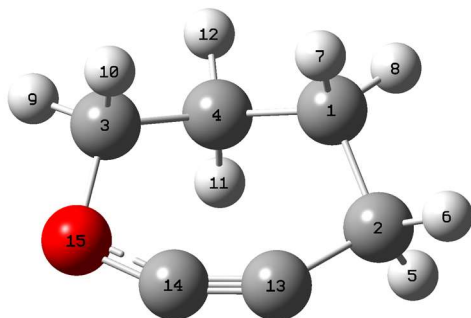

## Summary of Natural Population Analysis:

| Atom | No | Natural Charge | Natural Population |         |         |         |
|------|----|----------------|--------------------|---------|---------|---------|
|      |    |                | Core               | Valence | Rydberg | Total   |
| C    | 1  | -0.31815       | 1.99940            | 4.29991 | 0.01884 | 6.31815 |
| C    | 2  | -0.36768       | 1.99929            | 4.34698 | 0.02141 | 6.36768 |
| C    | 3  | 0.06675        | 1.99922            | 3.91006 | 0.02396 | 5.93325 |

|           |    |          |          |          |         |          |
|-----------|----|----------|----------|----------|---------|----------|
| C         | 4  | -0.38010 | 1.99937  | 4.36329  | 0.01743 | 6.38010  |
| H         | 5  | 0.18893  | 0.00000  | 0.80855  | 0.00252 | 0.81107  |
| H         | 6  | 0.19015  | 0.00000  | 0.80788  | 0.00197 | 0.80985  |
| H         | 7  | 0.17232  | 0.00000  | 0.82544  | 0.00224 | 0.82768  |
| H         | 8  | 0.17612  | 0.00000  | 0.82223  | 0.00165 | 0.82388  |
| H         | 9  | 0.16752  | 0.00000  | 0.83088  | 0.00160 | 0.83248  |
| H         | 10 | 0.15463  | 0.00000  | 0.84319  | 0.00217 | 0.84537  |
| H         | 11 | 0.18813  | 0.00000  | 0.80950  | 0.00237 | 0.81187  |
| H         | 12 | 0.18800  | 0.00000  | 0.81047  | 0.00153 | 0.81200  |
| C         | 13 | -0.19148 | 1.99805  | 4.17199  | 0.02144 | 6.19148  |
| C         | 14 | 0.37022  | 1.99773  | 3.59980  | 0.03225 | 5.62978  |
| O         | 15 | -0.60537 | 1.99974  | 6.58248  | 0.02315 | 8.60537  |
| =====     |    |          |          |          |         |          |
| * Total * |    | 0.00000  | 13.99279 | 37.83266 | 0.17455 | 52.00000 |

TS from singlet 26 to 27 by C shift

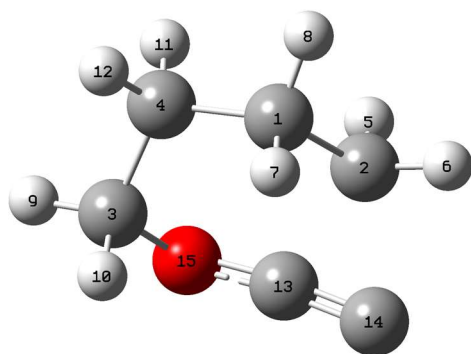

Summary of Natural Population Analysis:

| Atom | No | Natural Charge | Natural Population |         |         |         |
|------|----|----------------|--------------------|---------|---------|---------|
|      |    |                | Core               | Valence | Rydberg | Total   |
| C    | 1  | -0.35667       | 1.99935            | 4.33426 | 0.02306 | 6.35667 |
| C    | 2  | -0.32392       | 1.99924            | 4.29621 | 0.02847 | 6.32392 |

|           |    |          |          |          |         |          |
|-----------|----|----------|----------|----------|---------|----------|
| C         | 3  | 0.06052  | 1.99922  | 3.91746  | 0.02280 | 5.93948  |
| C         | 4  | -0.37046 | 1.99939  | 4.35359  | 0.01748 | 6.37046  |
| H         | 5  | 0.18659  | 0.00000  | 0.81115  | 0.00226 | 0.81341  |
| H         | 6  | 0.24264  | 0.00000  | 0.75596  | 0.00140 | 0.75736  |
| H         | 7  | 0.18778  | 0.00000  | 0.81030  | 0.00192 | 0.81222  |
| H         | 8  | 0.18664  | 0.00000  | 0.81190  | 0.00146 | 0.81336  |
| H         | 9  | 0.17261  | 0.00000  | 0.82585  | 0.00154 | 0.82739  |
| H         | 10 | 0.16155  | 0.00000  | 0.83622  | 0.00223 | 0.83845  |
| H         | 11 | 0.17915  | 0.00000  | 0.81849  | 0.00236 | 0.82085  |
| H         | 12 | 0.18929  | 0.00000  | 0.80901  | 0.00170 | 0.81071  |
| C         | 13 | 0.26316  | 1.99863  | 3.70021  | 0.03800 | 5.73684  |
| C         | 14 | -0.17701 | 1.99911  | 4.14796  | 0.02994 | 6.17701  |
| O         | 15 | -0.60186 | 1.99969  | 6.57727  | 0.02490 | 8.60186  |
| =====     |    |          |          |          |         |          |
| * Total * |    | -0.00000 | 13.99463 | 37.80585 | 0.19952 | 52.00000 |

TS from singlet 26 to 27 by O shift

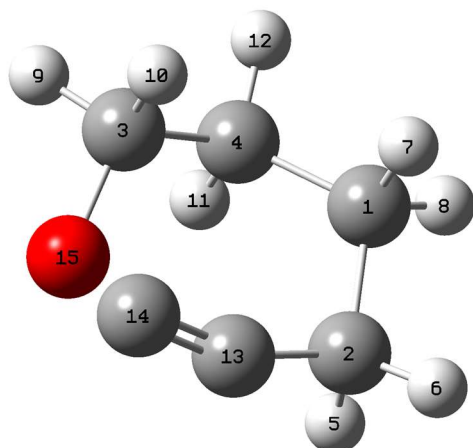

Summary of Natural Population Analysis:

Natural Population

| Atom      | No | Natural Charge | Core     | Valence  | Rydberg | Total    |
|-----------|----|----------------|----------|----------|---------|----------|
| C         | 1  | -0.31963       | 1.99939  | 4.30307  | 0.01717 | 6.31963  |
| C         | 2  | -0.46222       | 1.99922  | 4.43843  | 0.02457 | 6.46222  |
| C         | 3  | 0.04823        | 1.99931  | 3.92586  | 0.02661 | 5.95177  |
| C         | 4  | -0.36933       | 1.99939  | 4.35278  | 0.01716 | 6.36933  |
| H         | 5  | 0.20936        | 0.00000  | 0.78850  | 0.00214 | 0.79064  |
| H         | 6  | 0.23976        | 0.00000  | 0.75888  | 0.00136 | 0.76024  |
| H         | 7  | 0.17872        | 0.00000  | 0.81913  | 0.00216 | 0.82128  |
| H         | 8  | 0.18240        | 0.00000  | 0.81594  | 0.00166 | 0.81760  |
| H         | 9  | 0.16684        | 0.00000  | 0.83157  | 0.00158 | 0.83316  |
| H         | 10 | 0.15374        | 0.00000  | 0.84357  | 0.00270 | 0.84626  |
| H         | 11 | 0.17786        | 0.00000  | 0.81979  | 0.00236 | 0.82214  |
| H         | 12 | 0.18453        | 0.00000  | 0.81380  | 0.00167 | 0.81547  |
| C         | 13 | 0.22192        | 1.99916  | 3.75563  | 0.02329 | 5.77808  |
| C         | 14 | 0.02203        | 1.99865  | 3.93911  | 0.04021 | 5.97797  |
| O         | 15 | -0.63419       | 1.99983  | 6.61157  | 0.02279 | 8.63419  |
| * Total * |    | 0.00000        | 13.99494 | 37.81763 | 0.18743 | 52.00000 |

## 2-(1-thiocyclohexylidene)carbene (singlet 28)

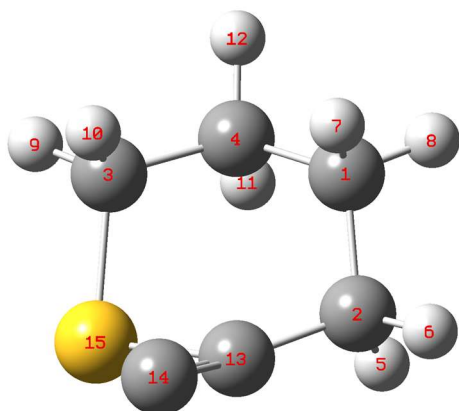

### Summary of Natural Population Analysis:

| Natural | Natural Population |
|---------|--------------------|
|         | -----              |

| Atom      | No | Charge   | Core     | Valence  | Rydberg | Total    |
|-----------|----|----------|----------|----------|---------|----------|
| C         | 1  | -0.32367 | 1.99939  | 4.30563  | 0.01866 | 6.32367  |
| C         | 2  | -0.36698 | 1.99926  | 4.34180  | 0.02593 | 6.36698  |
| C         | 3  | -0.46822 | 1.99932  | 4.44607  | 0.02283 | 6.46822  |
| C         | 4  | -0.34785 | 1.99938  | 4.32889  | 0.01957 | 6.34785  |
| H         | 5  | 0.19729  | 0.00000  | 0.80075  | 0.00196 | 0.80271  |
| H         | 6  | 0.20545  | 0.00000  | 0.79292  | 0.00164 | 0.79455  |
| H         | 7  | 0.17636  | 0.00000  | 0.82139  | 0.00225 | 0.82364  |
| H         | 8  | 0.18043  | 0.00000  | 0.81799  | 0.00158 | 0.81957  |
| H         | 9  | 0.19681  | 0.00000  | 0.80135  | 0.00183 | 0.80319  |
| H         | 10 | 0.19837  | 0.00000  | 0.79880  | 0.00283 | 0.80163  |
| H         | 11 | 0.17594  | 0.00000  | 0.82160  | 0.00246 | 0.82406  |
| H         | 12 | 0.18321  | 0.00000  | 0.81505  | 0.00174 | 0.81679  |
| C         | 13 | -0.38364 | 1.99906  | 4.33464  | 0.04994 | 6.38364  |
| C         | 14 | 0.00810  | 1.99939  | 3.96606  | 0.02644 | 5.99190  |
| S         | 15 | 0.36838  | 9.99914  | 5.58615  | 0.04633 | 15.63162 |
| * Total * |    | -0.00000 | 21.99493 | 37.77908 | 0.22598 | 60.00000 |

### 1-thiocyclohepty-2-yne (29)

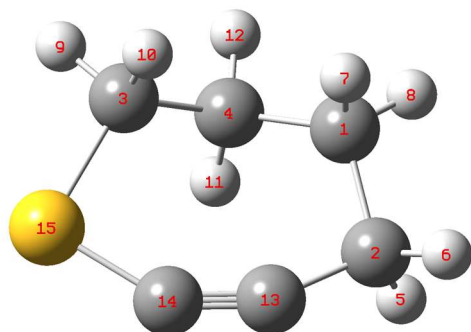

### Summary of Natural Population Analysis:

#### Natural Population

| Atom      | No | Natural Charge | Core     | Valence  | Rydberg | Total    |
|-----------|----|----------------|----------|----------|---------|----------|
| C         | 1  | -0.31293       | 1.99939  | 4.29456  | 0.01898 | 6.31293  |
| C         | 2  | -0.39173       | 1.99927  | 4.37242  | 0.02003 | 6.39173  |
| C         | 3  | -0.44057       | 1.99928  | 4.41893  | 0.02236 | 6.44057  |
| C         | 4  | -0.35685       | 1.99937  | 4.33750  | 0.01998 | 6.35685  |
| H         | 5  | 0.19496        | 0.00000  | 0.80260  | 0.00244 | 0.80504  |
| H         | 6  | 0.19870        | 0.00000  | 0.79944  | 0.00186 | 0.80130  |
| H         | 7  | 0.17431        | 0.00000  | 0.82356  | 0.00213 | 0.82569  |
| H         | 8  | 0.17930        | 0.00000  | 0.81916  | 0.00155 | 0.82070  |
| H         | 9  | 0.19074        | 0.00000  | 0.80752  | 0.00174 | 0.80926  |
| H         | 10 | 0.18475        | 0.00000  | 0.81244  | 0.00280 | 0.81525  |
| H         | 11 | 0.18924        | 0.00000  | 0.80846  | 0.00230 | 0.81076  |
| H         | 12 | 0.18401        | 0.00000  | 0.81447  | 0.00152 | 0.81599  |
| C         | 13 | -0.00363       | 1.99827  | 3.98385  | 0.02150 | 6.00363  |
| C         | 14 | -0.27353       | 1.99794  | 4.25251  | 0.02307 | 6.27353  |
| S         | 15 | 0.28323        | 9.99897  | 5.66365  | 0.05415 | 15.71677 |
| * Total * |    | -0.00000       | 21.99250 | 37.81109 | 0.19641 | 60.00000 |

TS from singlet 28 to 29 by C shift

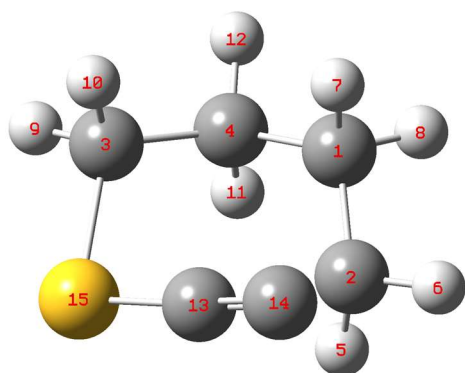

Summary of Natural Population Analysis:

Natural Population

| Atom      | No | Natural Charge | Core     | Valence  | Rydberg | Total    |
|-----------|----|----------------|----------|----------|---------|----------|
| C         | 1  | -0.36065       | 1.99934  | 4.33660  | 0.02471 | 6.36065  |
| C         | 2  | -0.28569       | 1.99922  | 4.25767  | 0.02880 | 6.28569  |
| C         | 3  | -0.43191       | 1.99927  | 4.41036  | 0.02228 | 6.43191  |
| C         | 4  | -0.34840       | 1.99937  | 4.32504  | 0.02398 | 6.34840  |
| H         | 5  | 0.19479        | 0.00000  | 0.80303  | 0.00218 | 0.80521  |
| H         | 6  | 0.23908        | 0.00000  | 0.75960  | 0.00133 | 0.76092  |
| H         | 7  | 0.18979        | 0.00000  | 0.80832  | 0.00189 | 0.81021  |
| H         | 8  | 0.18635        | 0.00000  | 0.81231  | 0.00135 | 0.81365  |
| H         | 9  | 0.19667        | 0.00000  | 0.80171  | 0.00162 | 0.80333  |
| H         | 10 | 0.19460        | 0.00000  | 0.80269  | 0.00271 | 0.80540  |
| H         | 11 | 0.17830        | 0.00000  | 0.81965  | 0.00204 | 0.82170  |
| H         | 12 | 0.18519        | 0.00000  | 0.81340  | 0.00141 | 0.81481  |
| C         | 13 | -0.39221       | 1.99870  | 4.35172  | 0.04180 | 6.39221  |
| C         | 14 | -0.06009       | 1.99920  | 4.03062  | 0.03027 | 6.06009  |
| S         | 15 | 0.31419        | 9.99885  | 5.64031  | 0.04666 | 15.68581 |
| * Total * |    | -0.00000       | 21.99394 | 37.77303 | 0.23303 | 60.00000 |

TS from singlet 28 to 29 by S shift

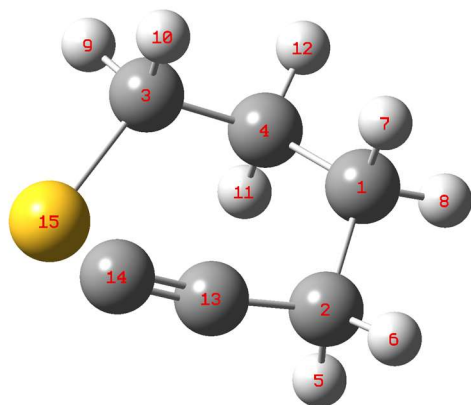

Summary of Natural Population Analysis:

|           |    | Natural Population |          |          |         |          |
|-----------|----|--------------------|----------|----------|---------|----------|
| Atom      | No | Natural Charge     | Core     | Valence  | Rydberg | Total    |
| C         | 1  | -0.31756           | 1.99938  | 4.29973  | 0.01844 | 6.31756  |
| C         | 2  | -0.43862           | 1.99918  | 4.41387  | 0.02558 | 6.43862  |
| C         | 3  | -0.46562           | 1.99929  | 4.44196  | 0.02437 | 6.46562  |
| C         | 4  | -0.35107           | 1.99937  | 4.33149  | 0.02021 | 6.35107  |
| H         | 5  | 0.21025            | 0.00000  | 0.78733  | 0.00242 | 0.78975  |
| H         | 6  | 0.23294            | 0.00000  | 0.76556  | 0.00151 | 0.76706  |
| H         | 7  | 0.17735            | 0.00000  | 0.82045  | 0.00219 | 0.82265  |
| H         | 8  | 0.18233            | 0.00000  | 0.81610  | 0.00157 | 0.81767  |
| H         | 9  | 0.19951            | 0.00000  | 0.79877  | 0.00173 | 0.80049  |
| H         | 10 | 0.19454            | 0.00000  | 0.80258  | 0.00288 | 0.80546  |
| H         | 11 | 0.17853            | 0.00000  | 0.81890  | 0.00257 | 0.82147  |
| H         | 12 | 0.18246            | 0.00000  | 0.81574  | 0.00180 | 0.81754  |
| C         | 13 | 0.03163            | 1.99902  | 3.94063  | 0.02872 | 5.96837  |
| C         | 14 | -0.29280           | 1.99872  | 4.24988  | 0.04420 | 6.29280  |
| S         | 15 | 0.27614            | 9.99928  | 5.67676  | 0.04782 | 15.72386 |
| =====     |    |                    |          |          |         |          |
| * Total * |    | 0.00000            | 21.99423 | 37.77977 | 0.22600 | 60.00000 |
